# Supplementary material
Source: ML conference proceedings conference paper supplement (https://openaccess.thecvf.com/content/CVPR_2019/html/Lee_Deep_Defocus_Map_CVPR_2019_paper.html)
Supplement: Supplementary file 1 [file Lee_Deep_Defocus_Map_CVPR_2019_supplemental.zip]

Archive with 2 entries (2 files):
- 5571-more-result.pdf
- 5571-supp.pdf
