# Supplementary material
Source: ML conference proceedings conference paper supplement (https://openaccess.thecvf.com/content/CVPR_2019/html/Lee_Deep_Defocus_Map_CVPR_2019_paper.html)
Supplement: Supplementary file 1 [file Lee_Deep_Defocus_Map_CVPR_2019_supplemental.zip › 5571-more-result.pdf]

# Deep Defocus Map Estimation using Domain Adaptation

-Supplementary material-

Junyong Lee<sup>1</sup>

POSTECH

Sungkil Lee<sup>2</sup>

Sungkyunkwan University

Sunghyun Cho<sup>3</sup>

DGIST

Seungyong Lee<sup>1</sup>

POSTECH

<sup>1</sup>{junyonglee, leesy}@postech.ac.kr

<sup>2</sup>sungkil@skku.edu

<sup>3</sup>scho@dgist.ac.kr

**Closed-up views for Figures in the main paper**

Figure 3: Outputs generated with combined subnetworks in our network.

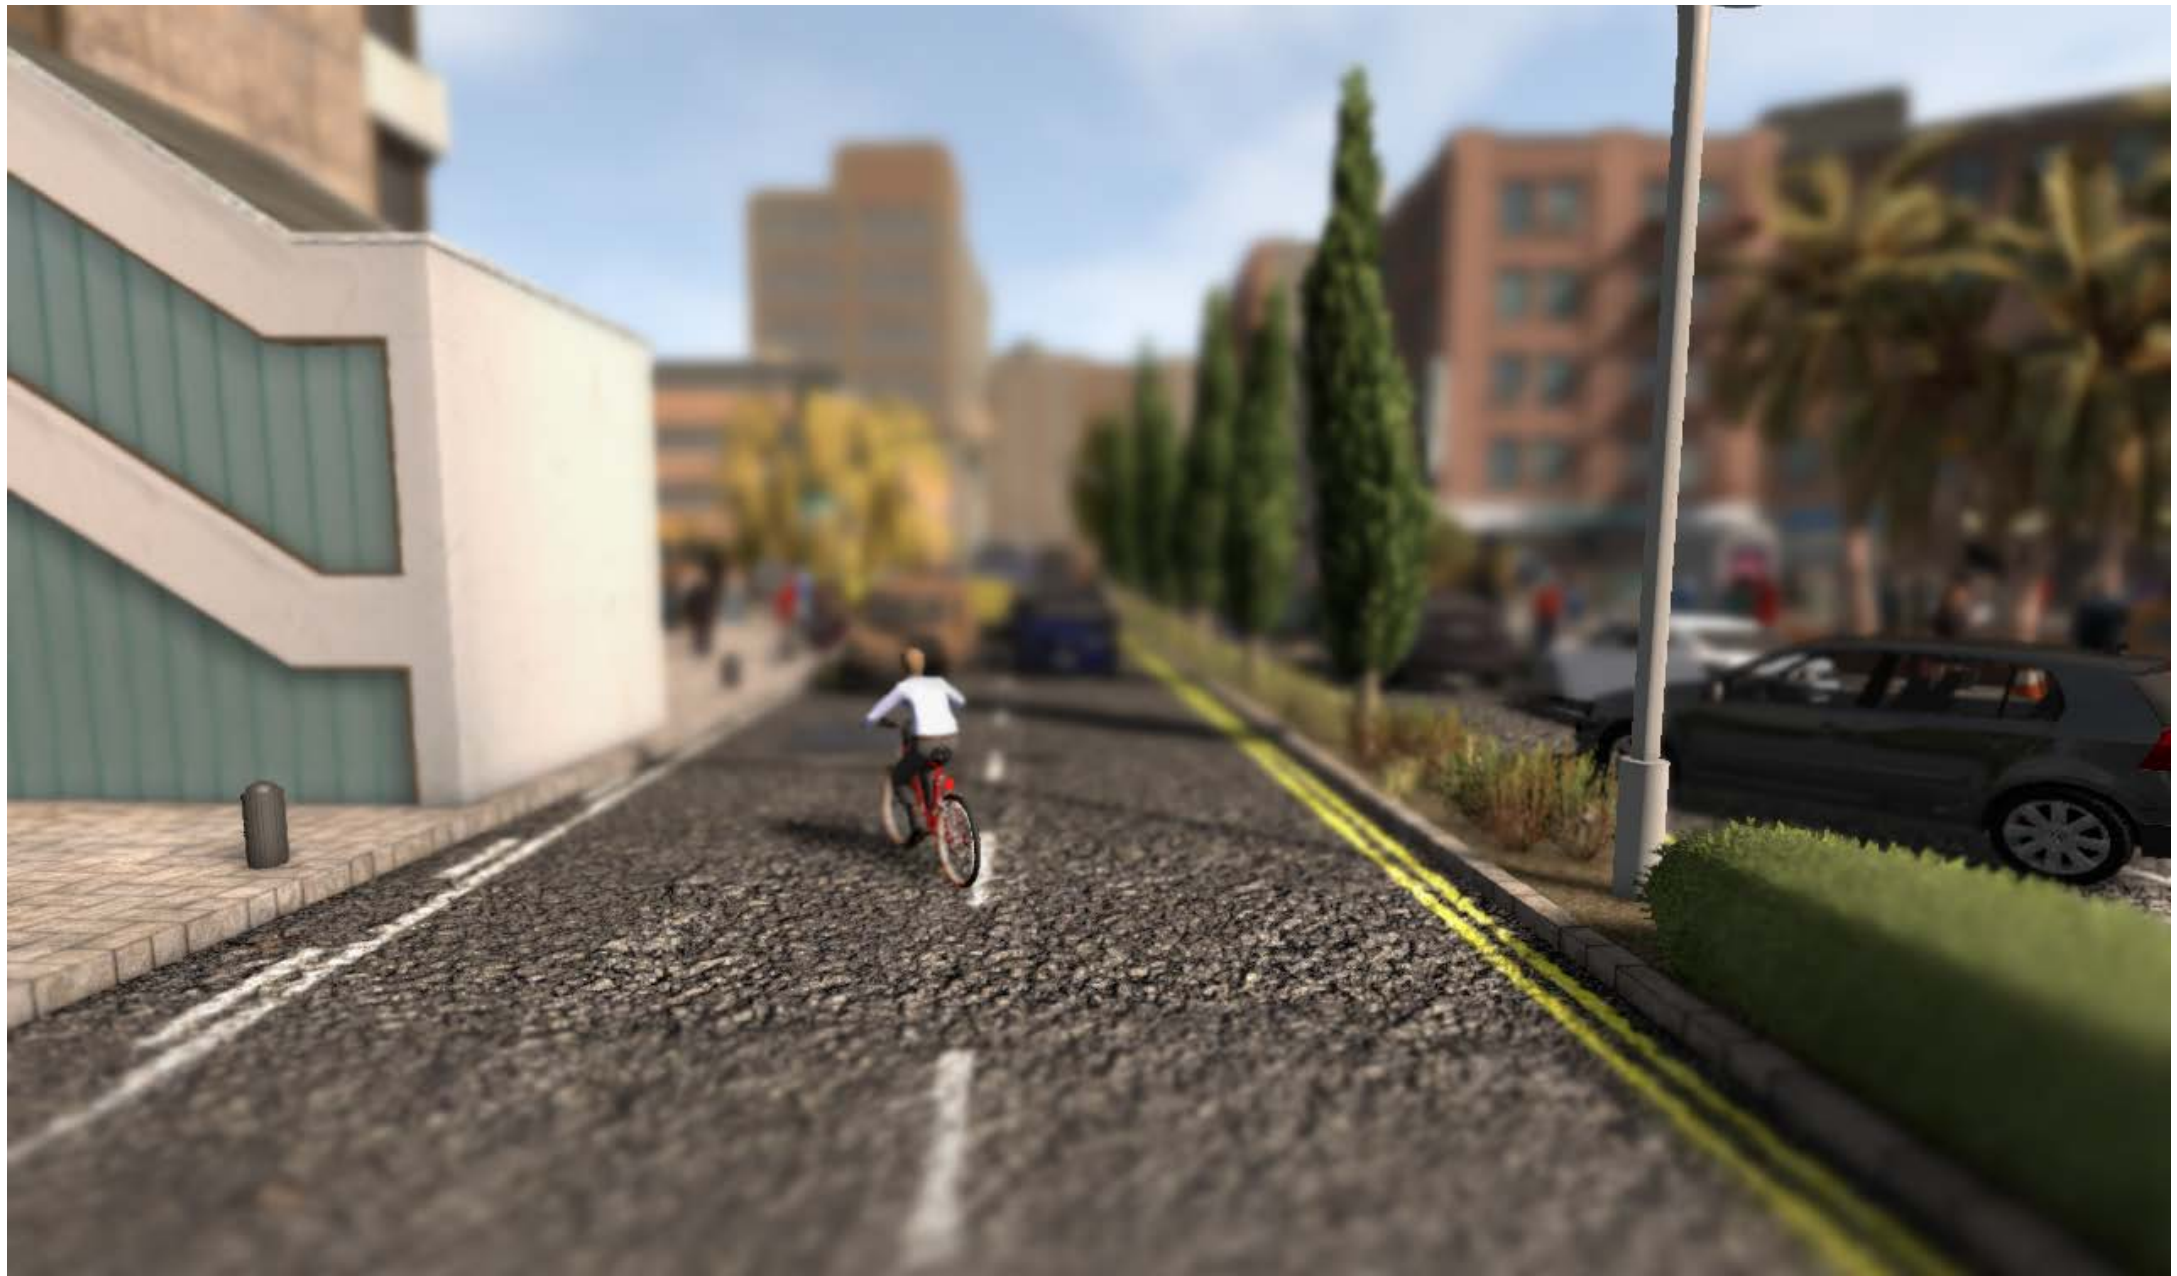

Input

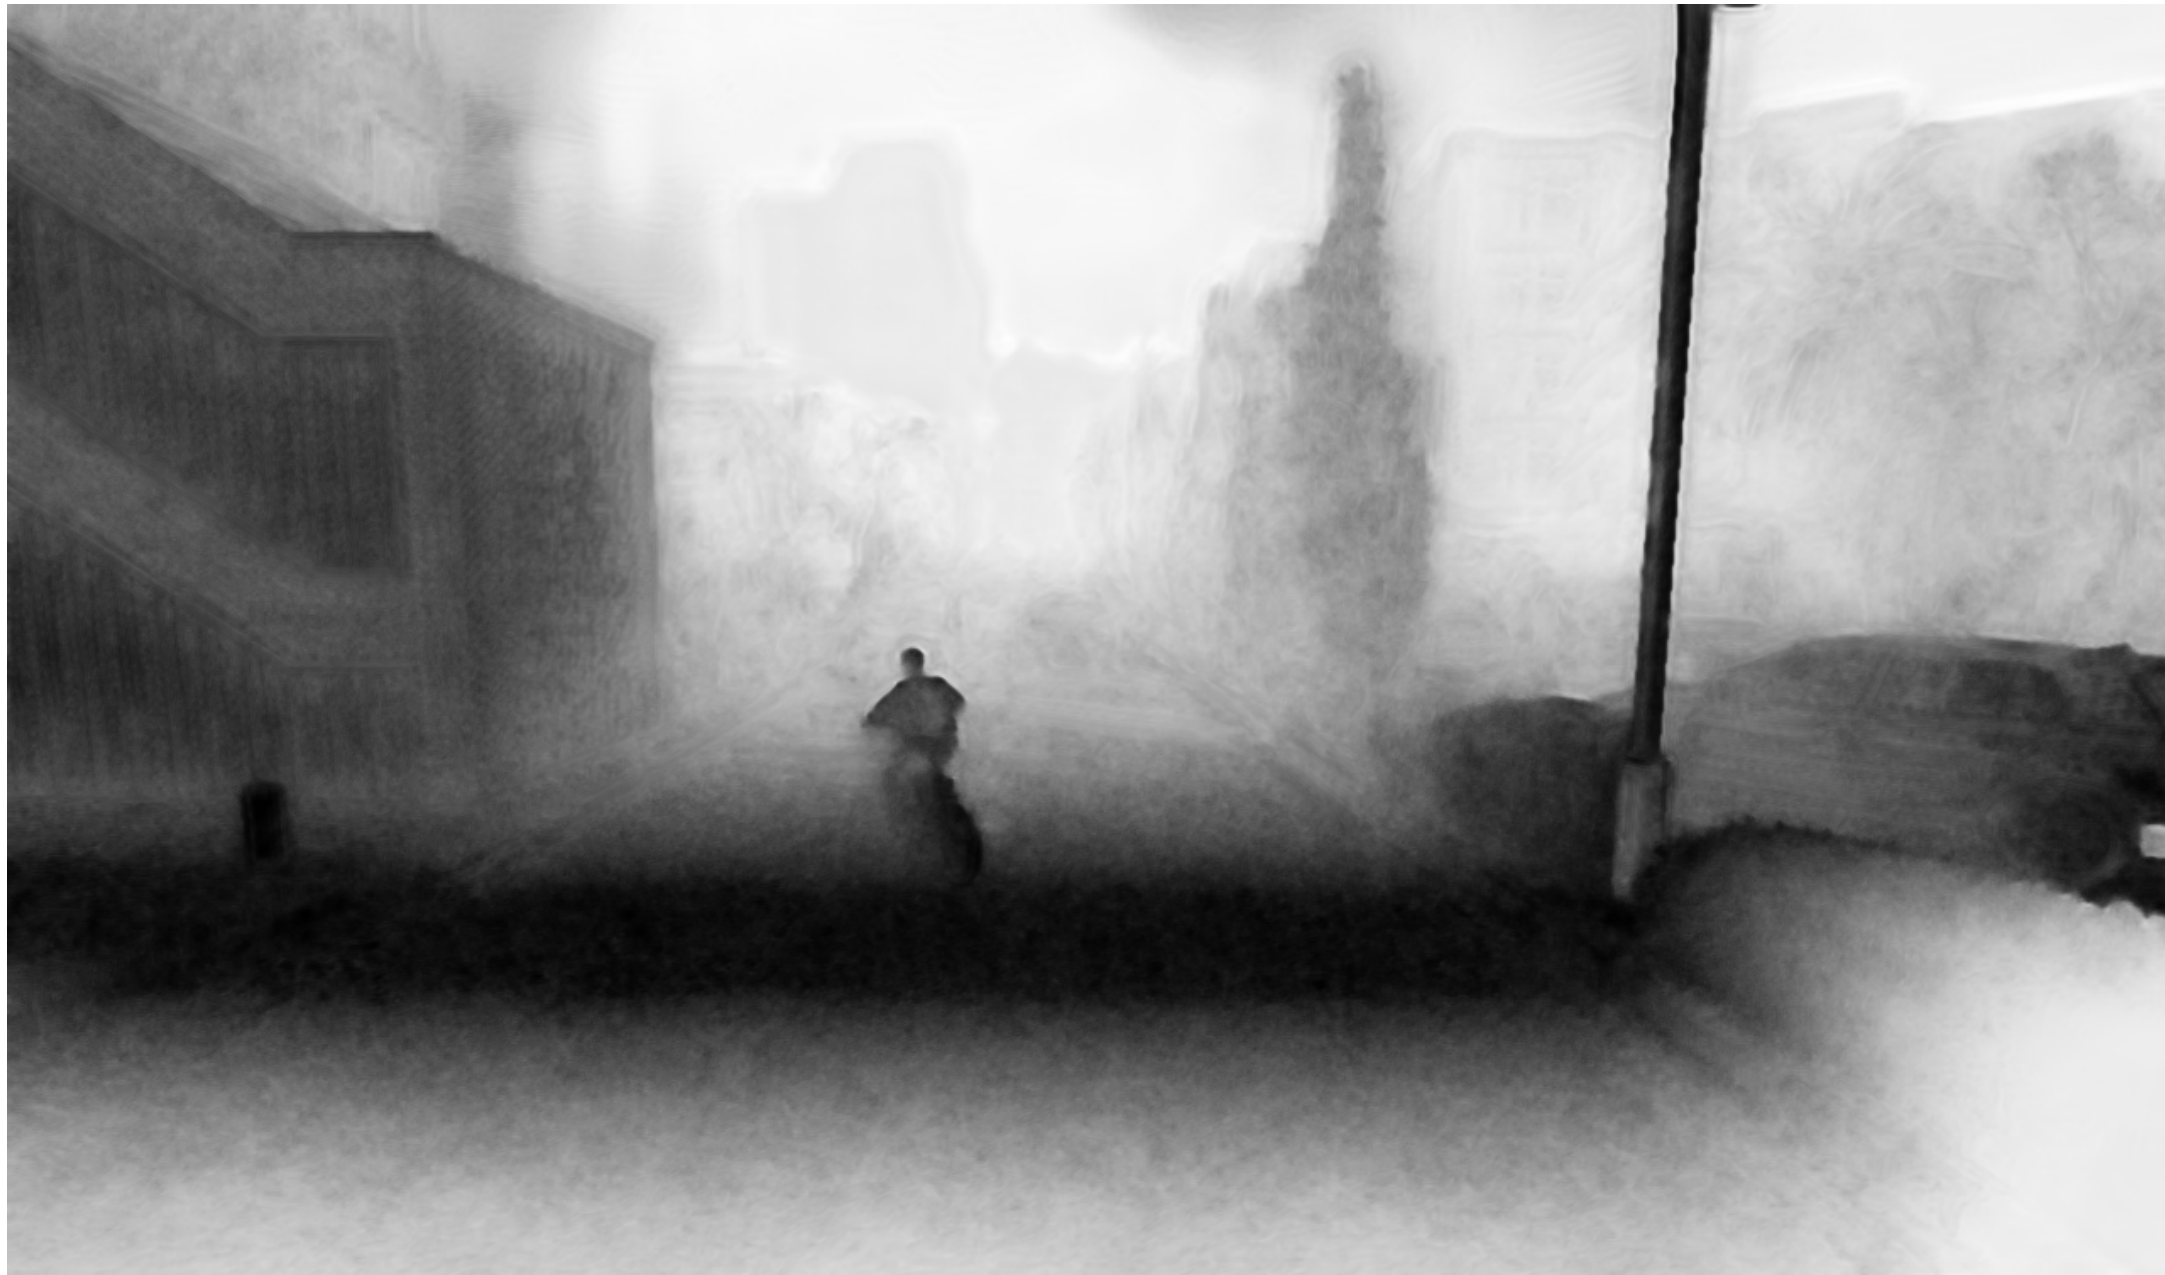

*DMENet<sub>B</sub>*

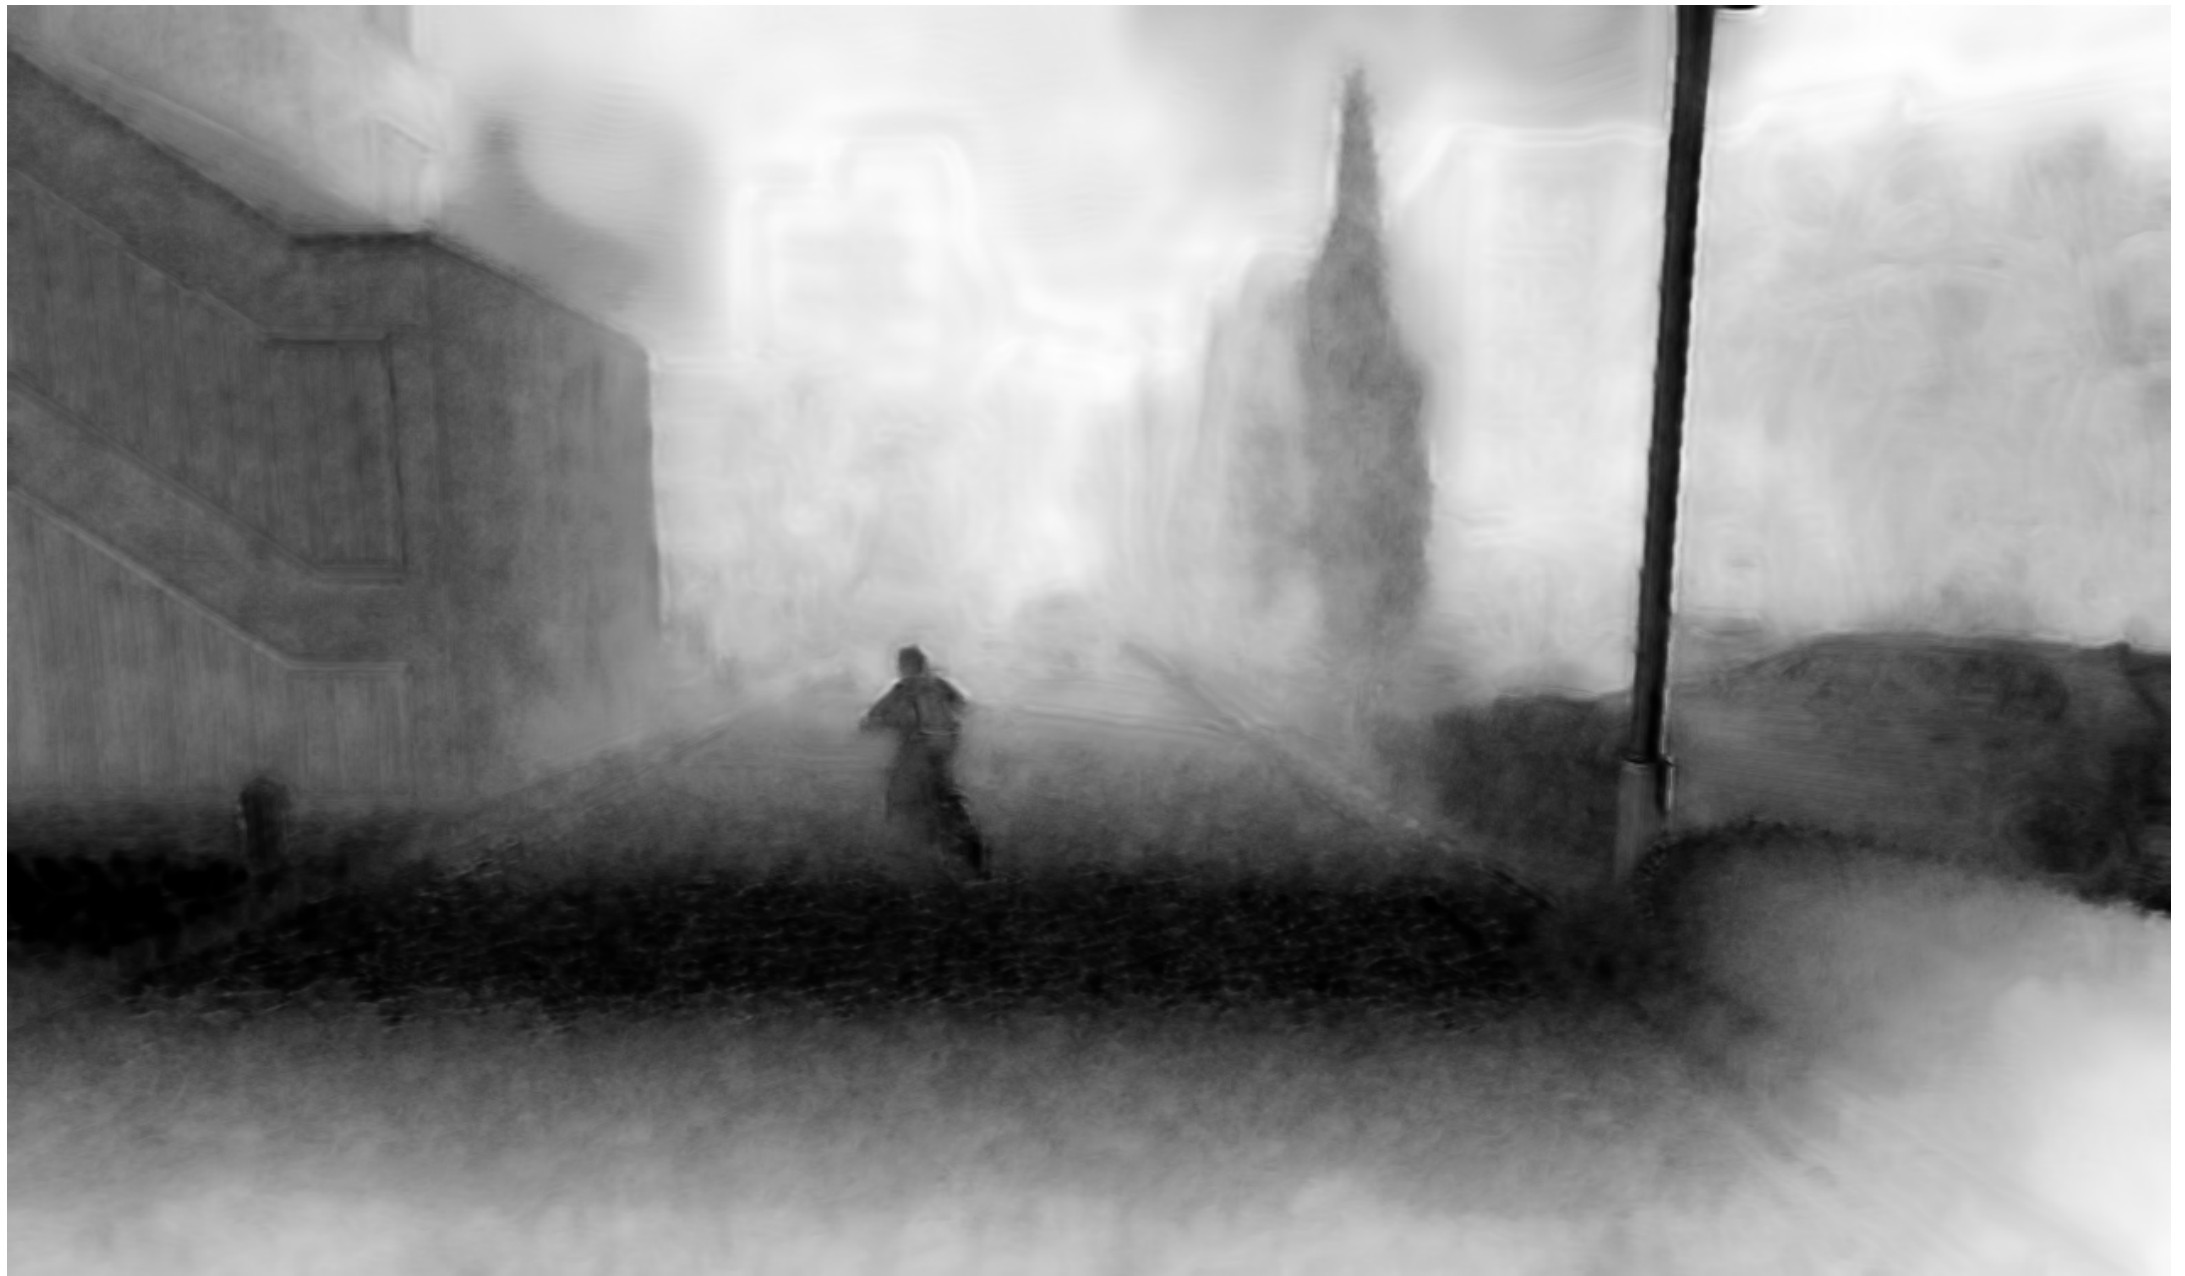

*DMENet<sub>BD</sub>*

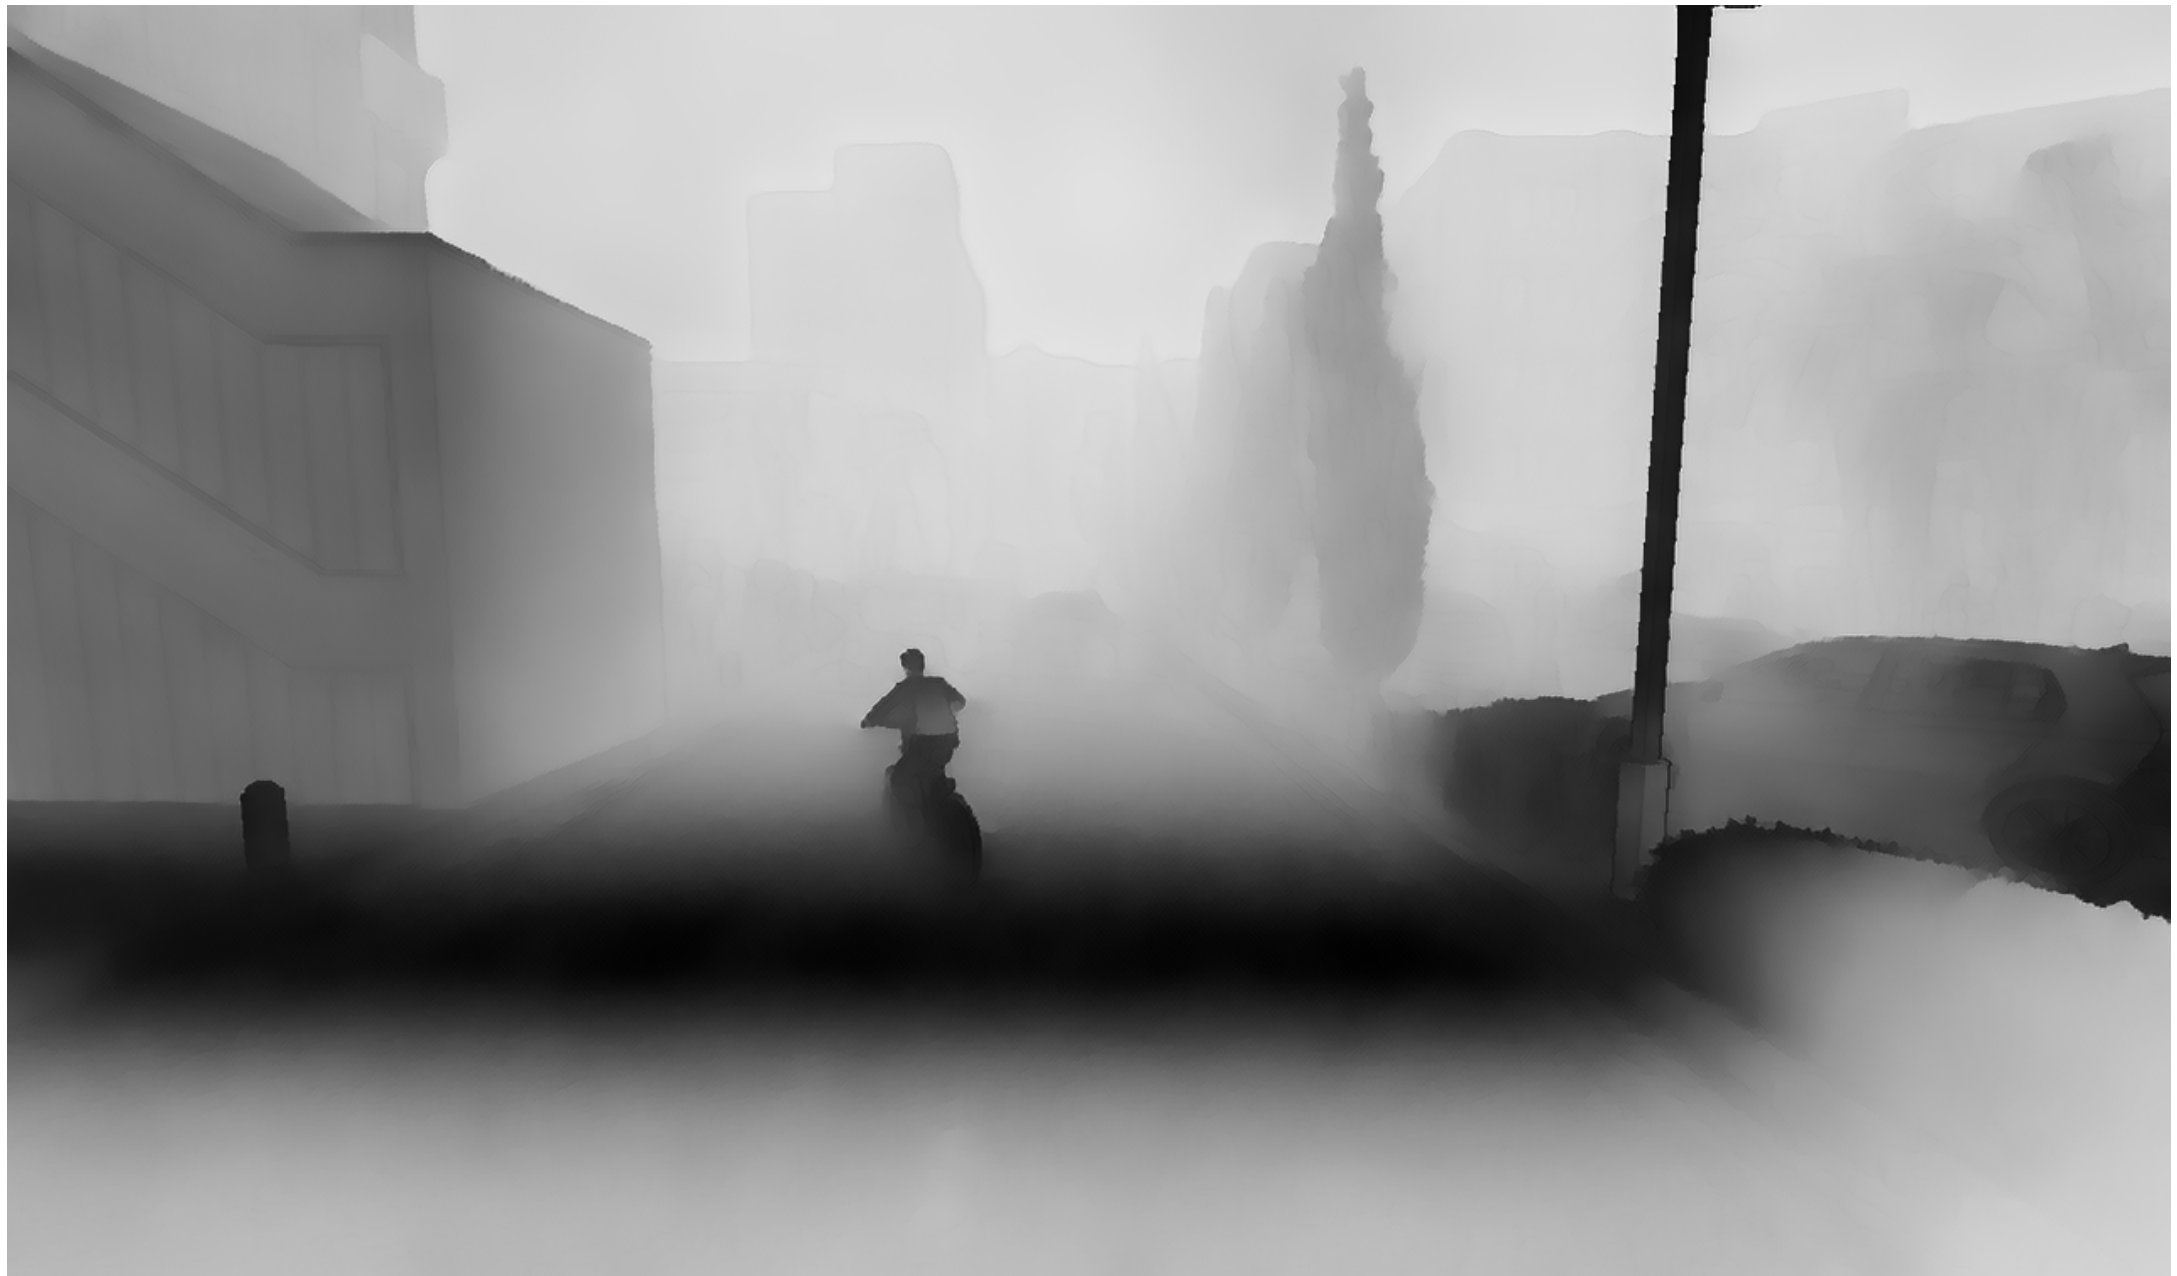

*DMENet<sub>BDC</sub>*

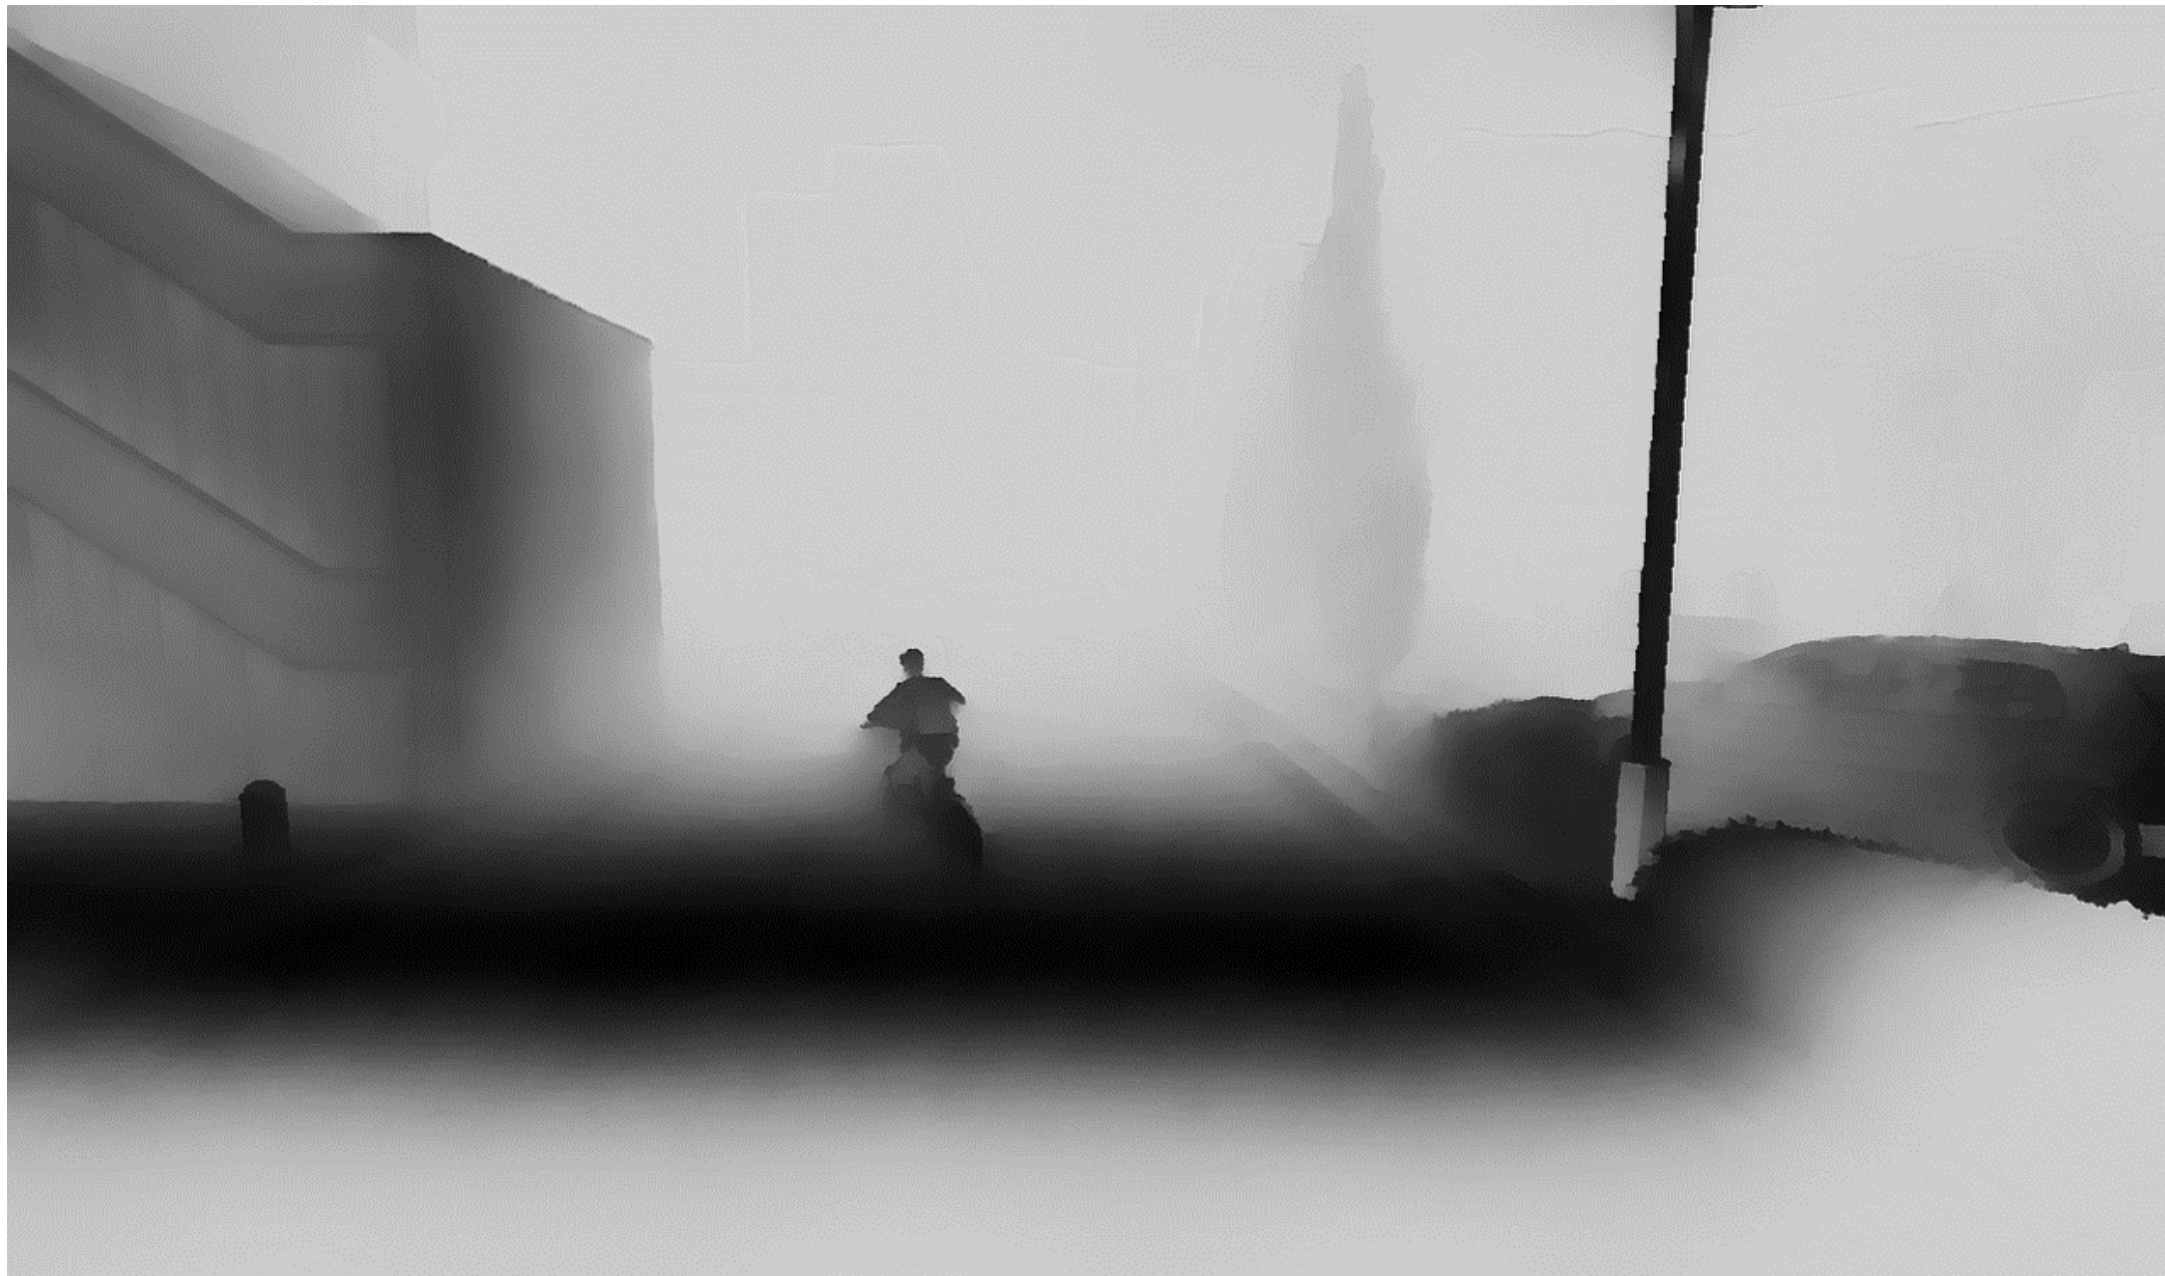

$DMENet_{BDCS}^{w/o L_{aux}}$

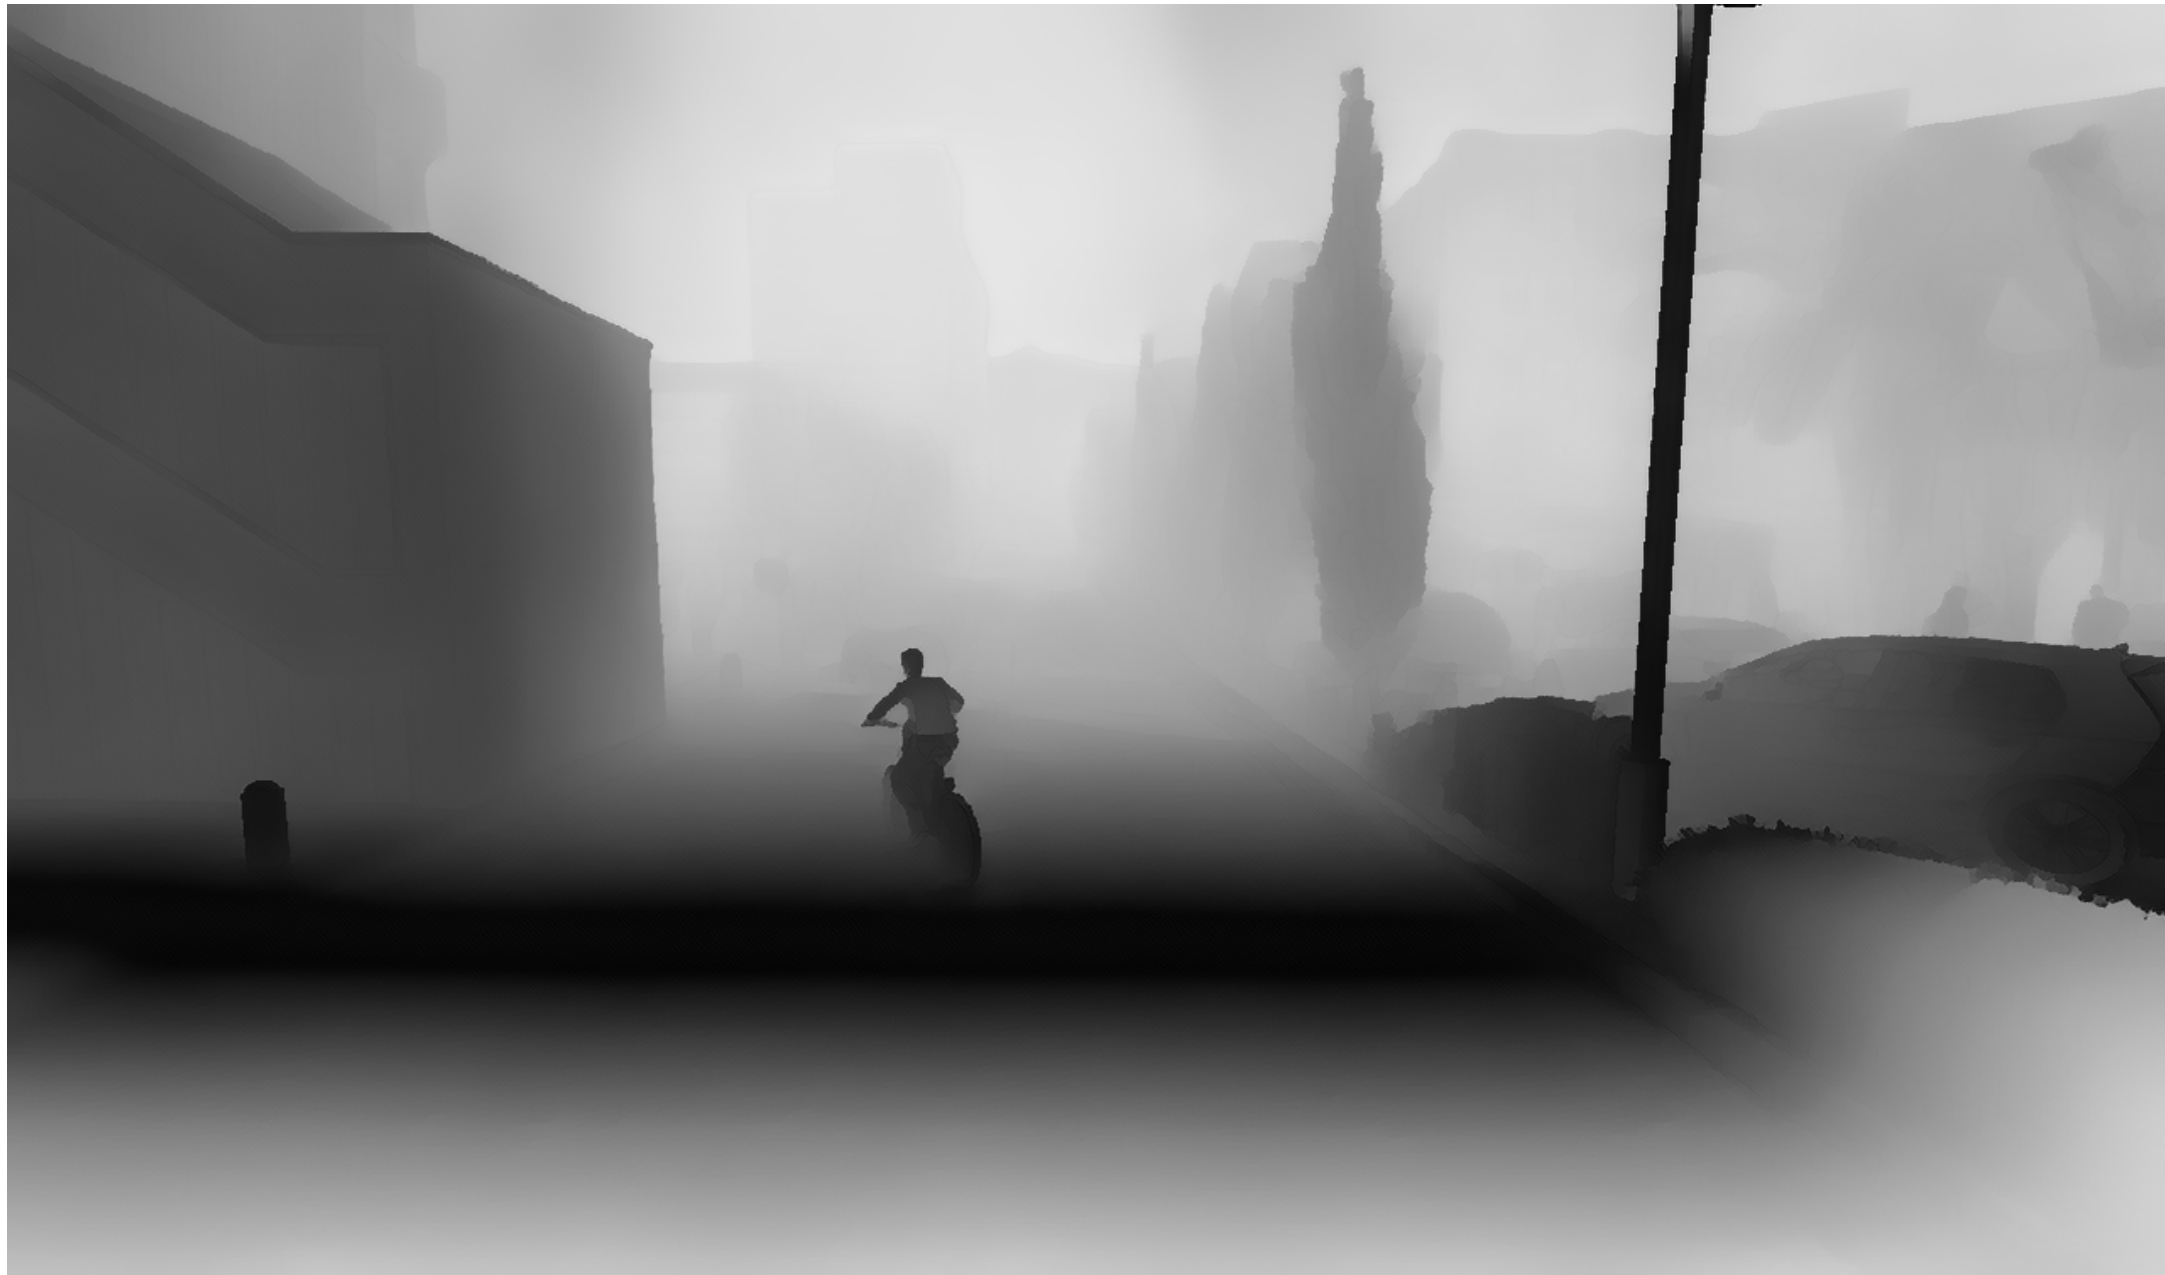

*DMENet<sub>BDCS</sub>*

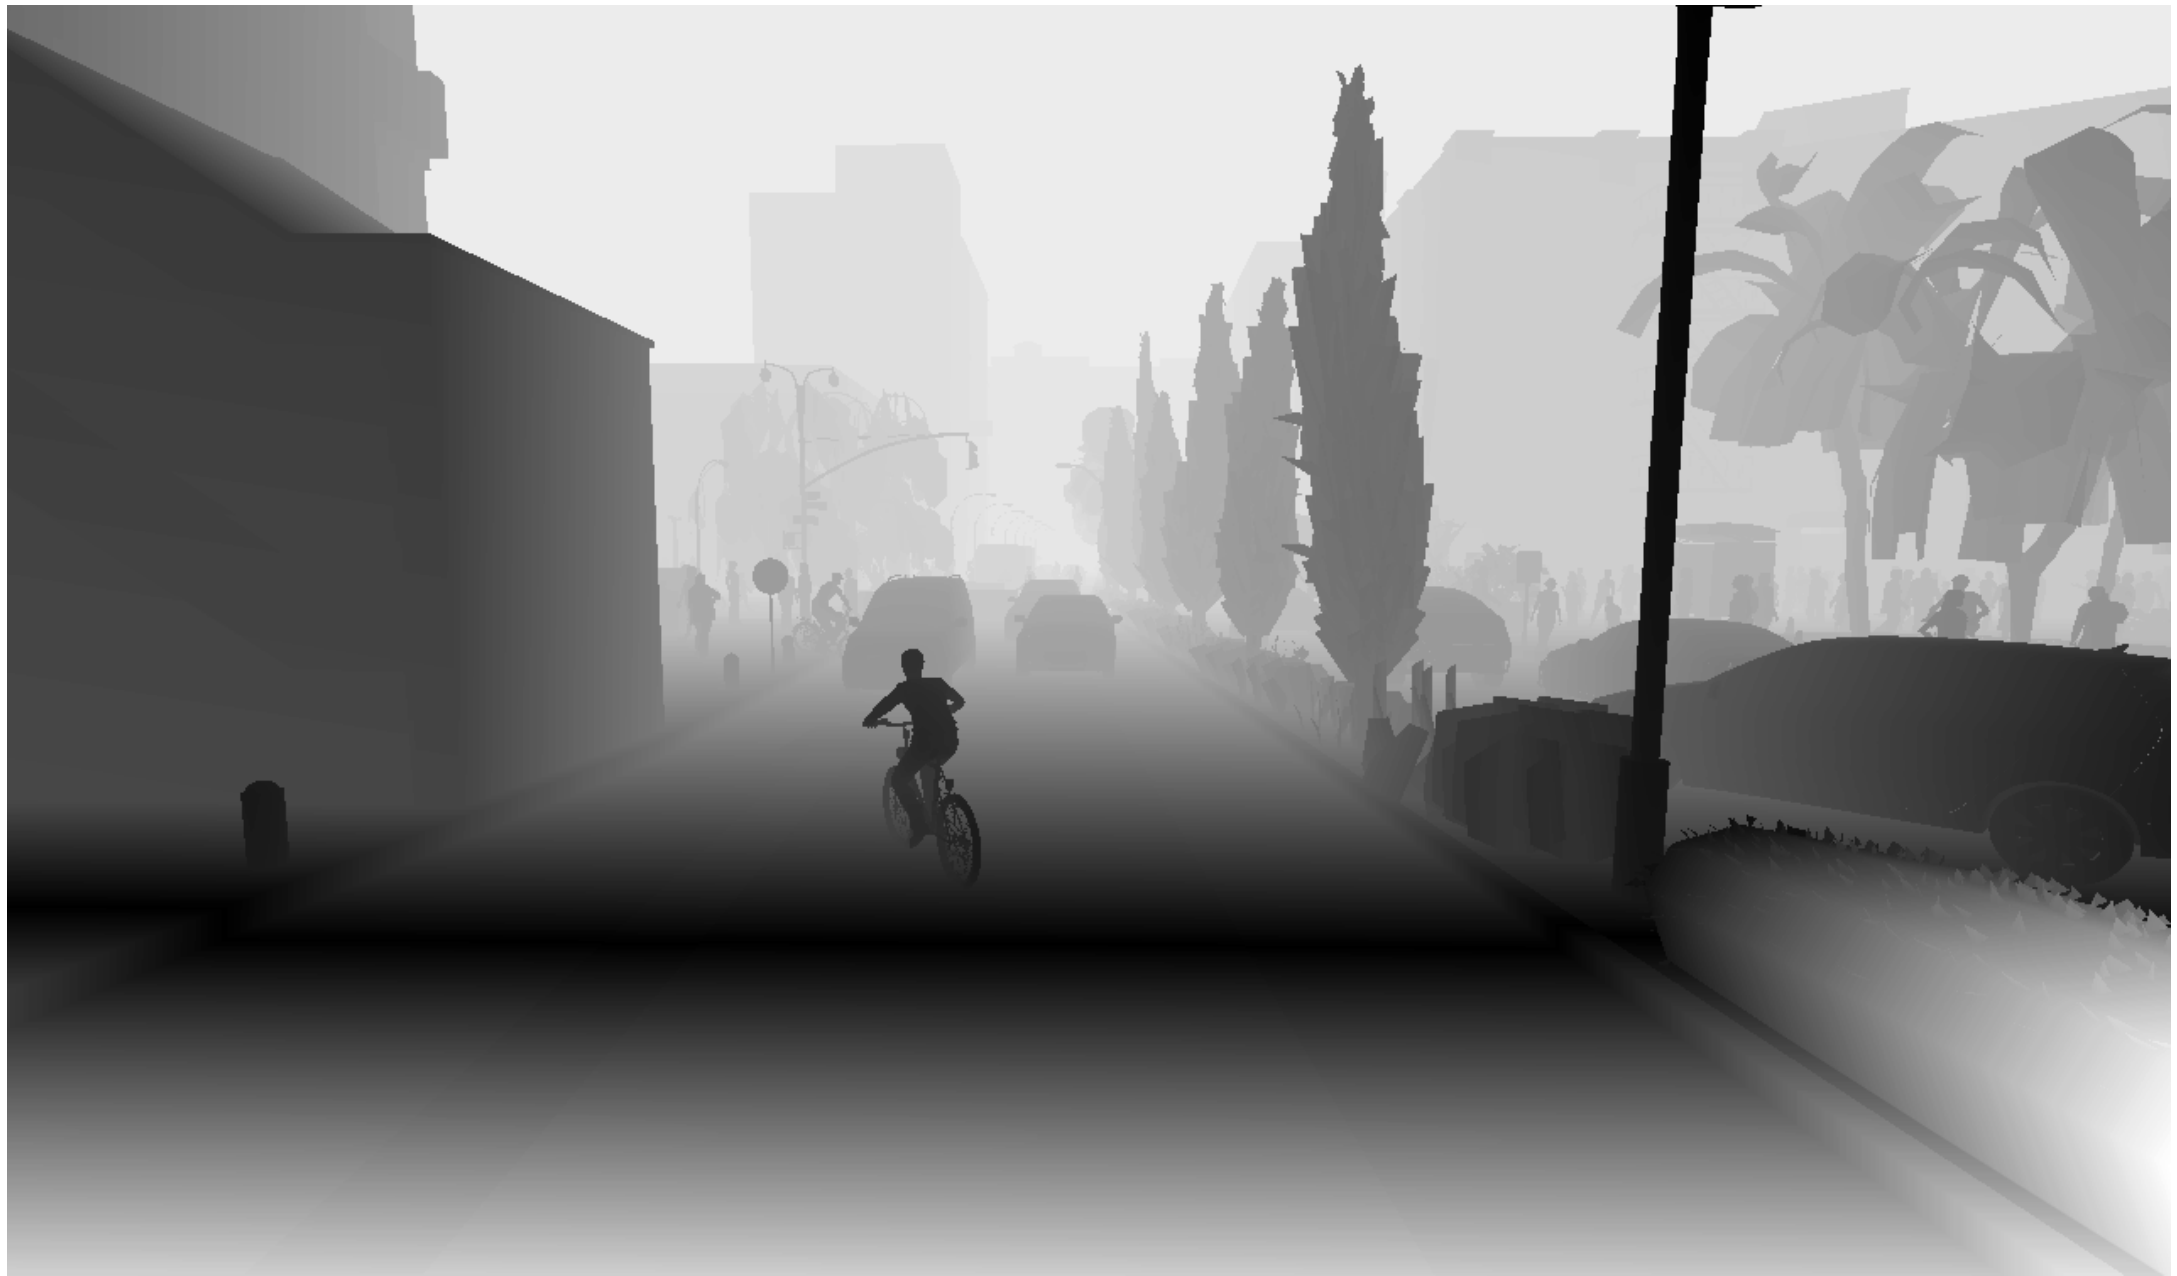

GT

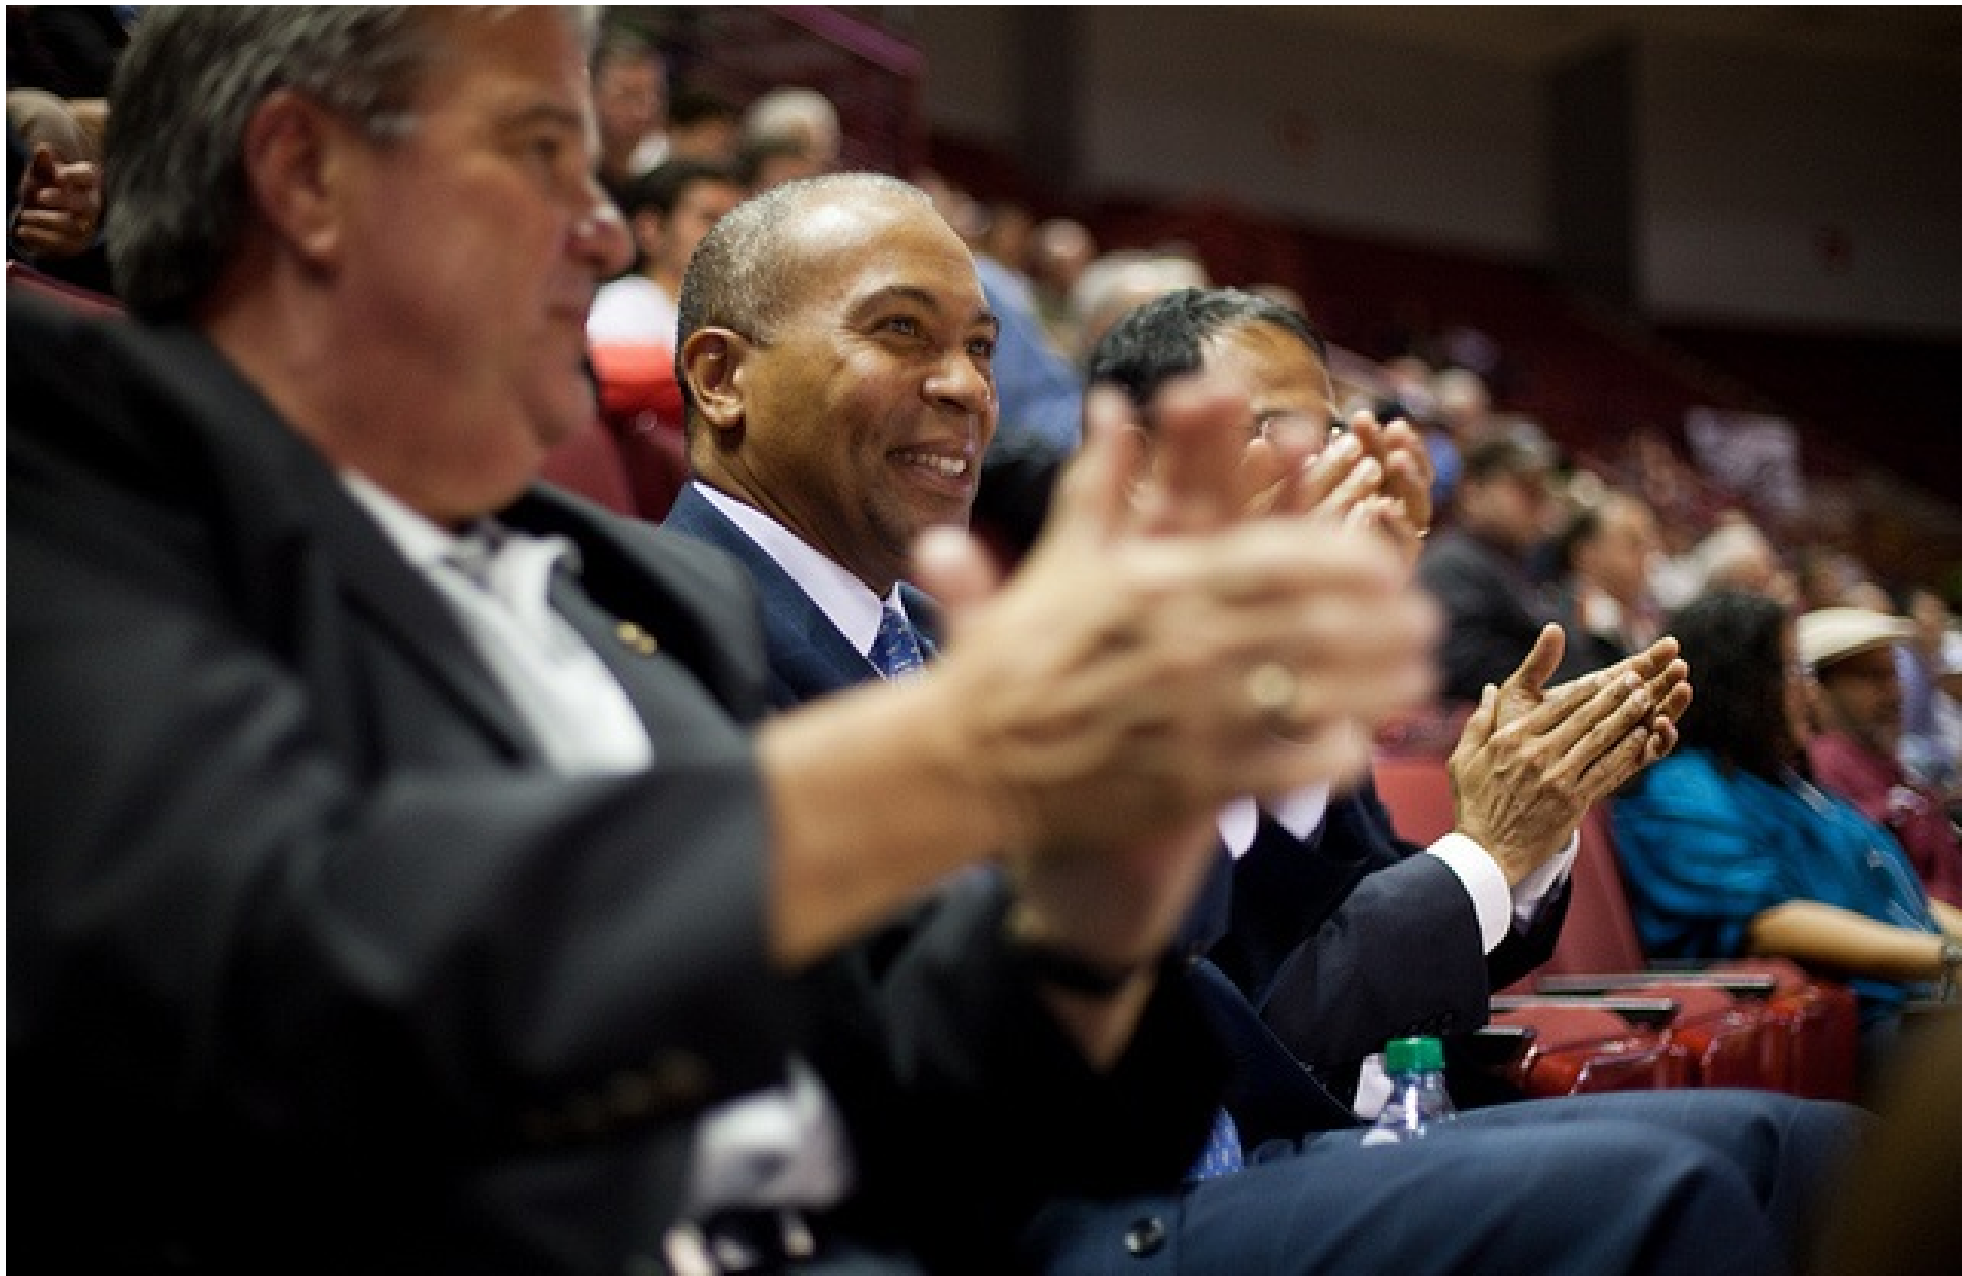

Input

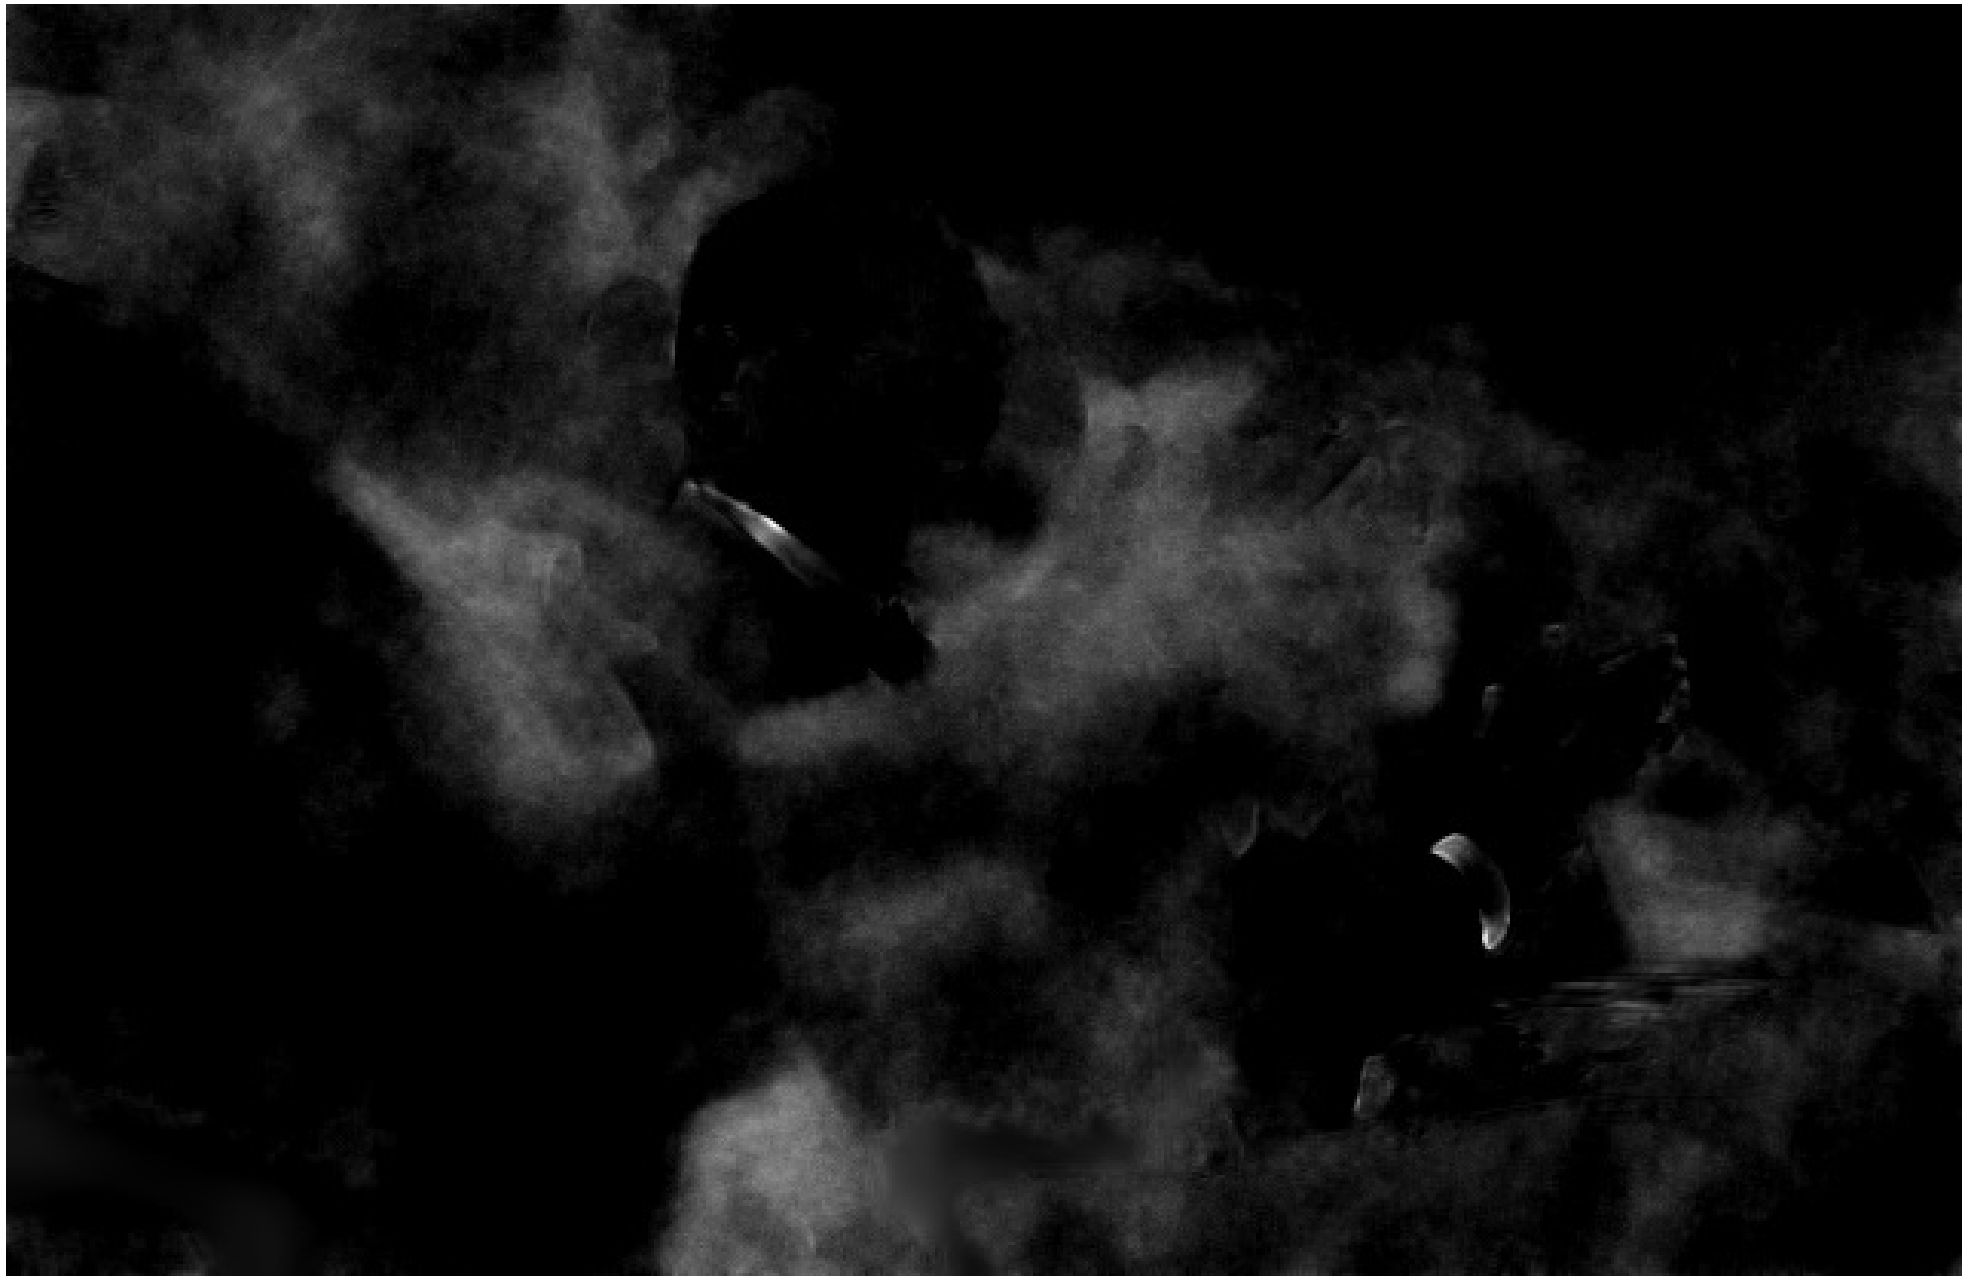

*DMENet<sub>B</sub>*

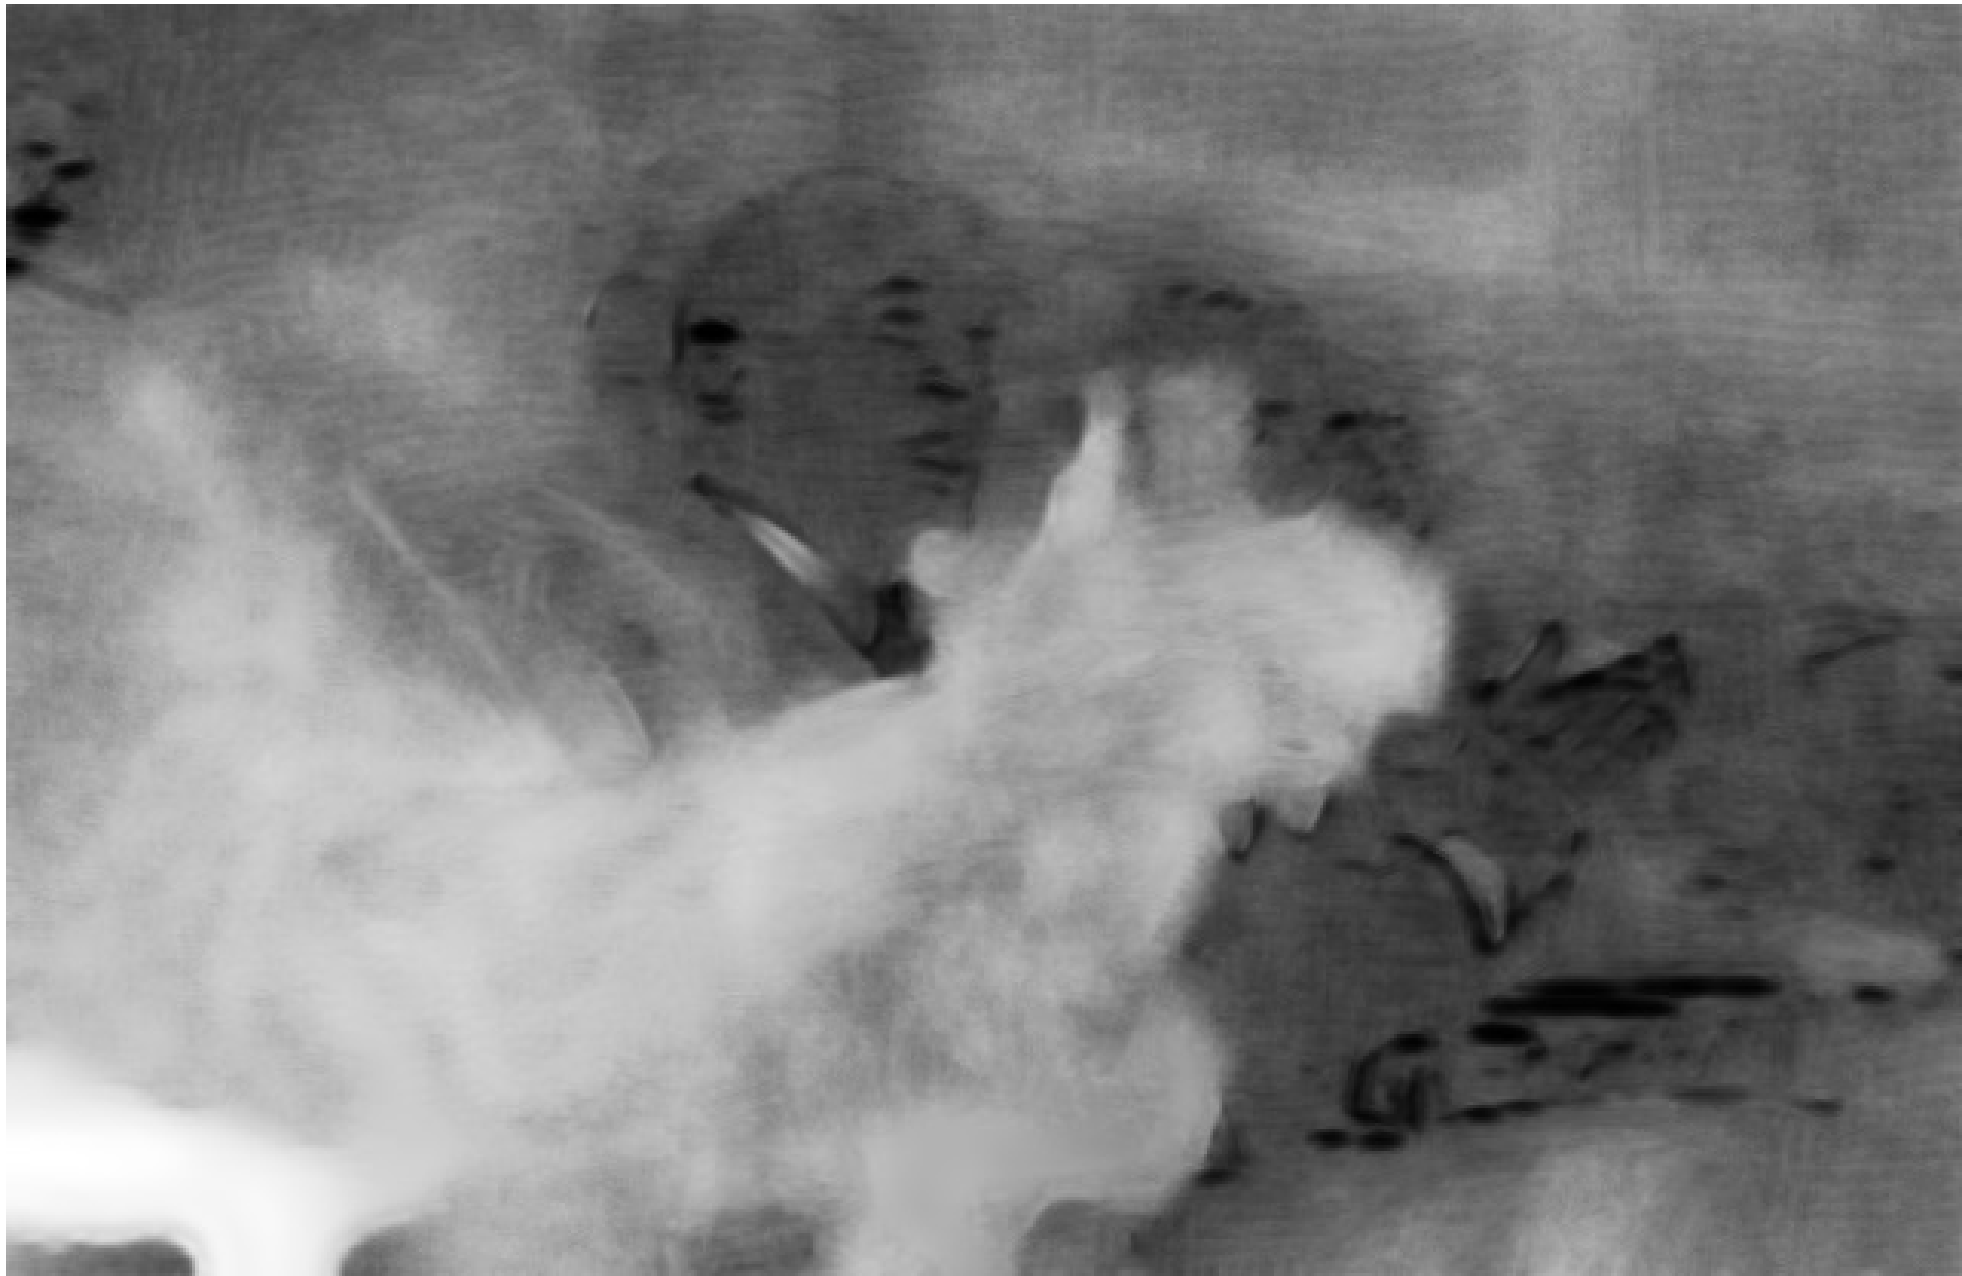

*DMENet<sub>BD</sub>*

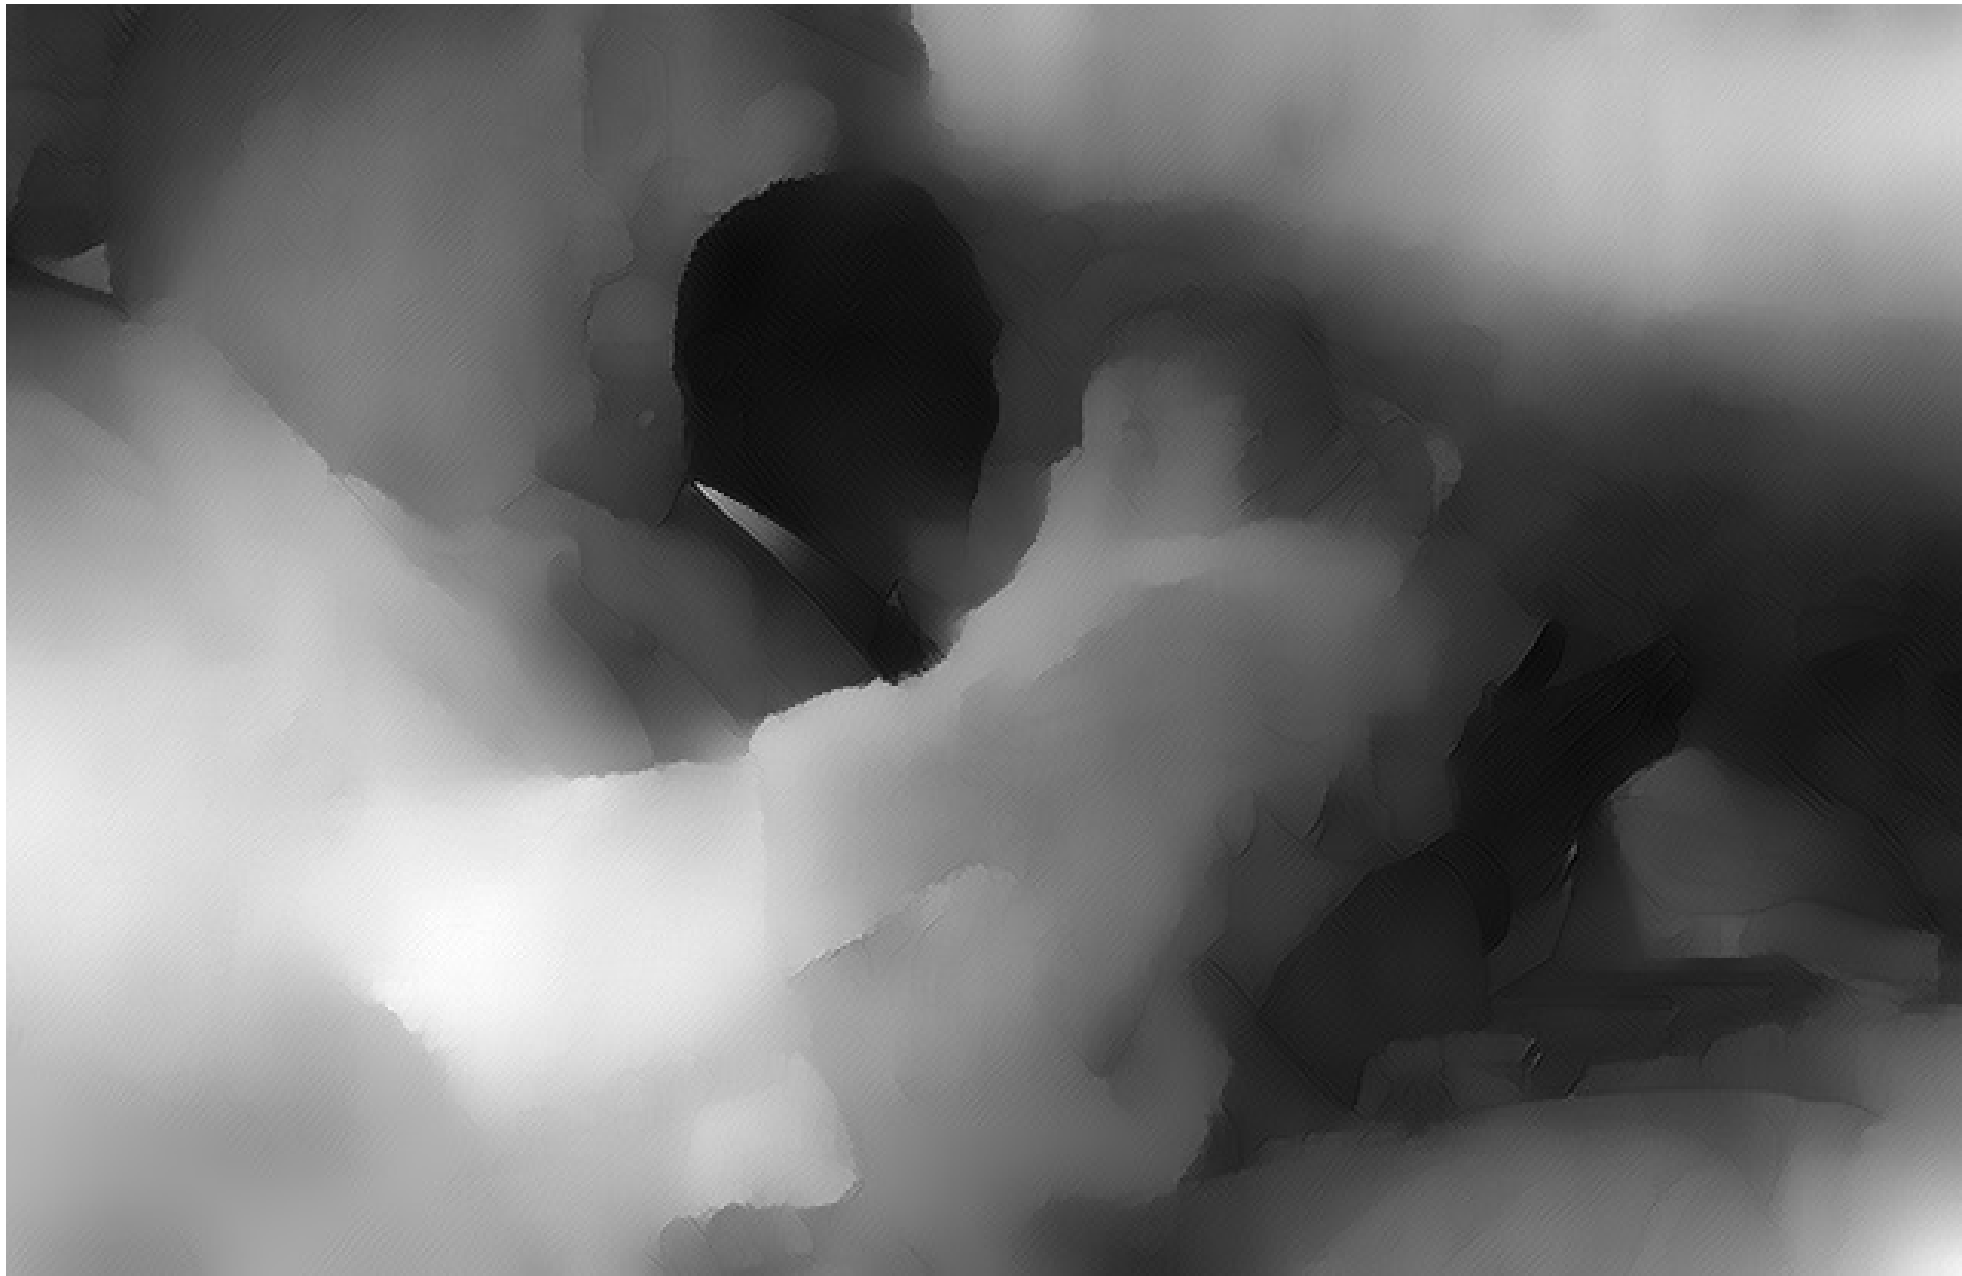

*DMENet<sub>BDC</sub>*

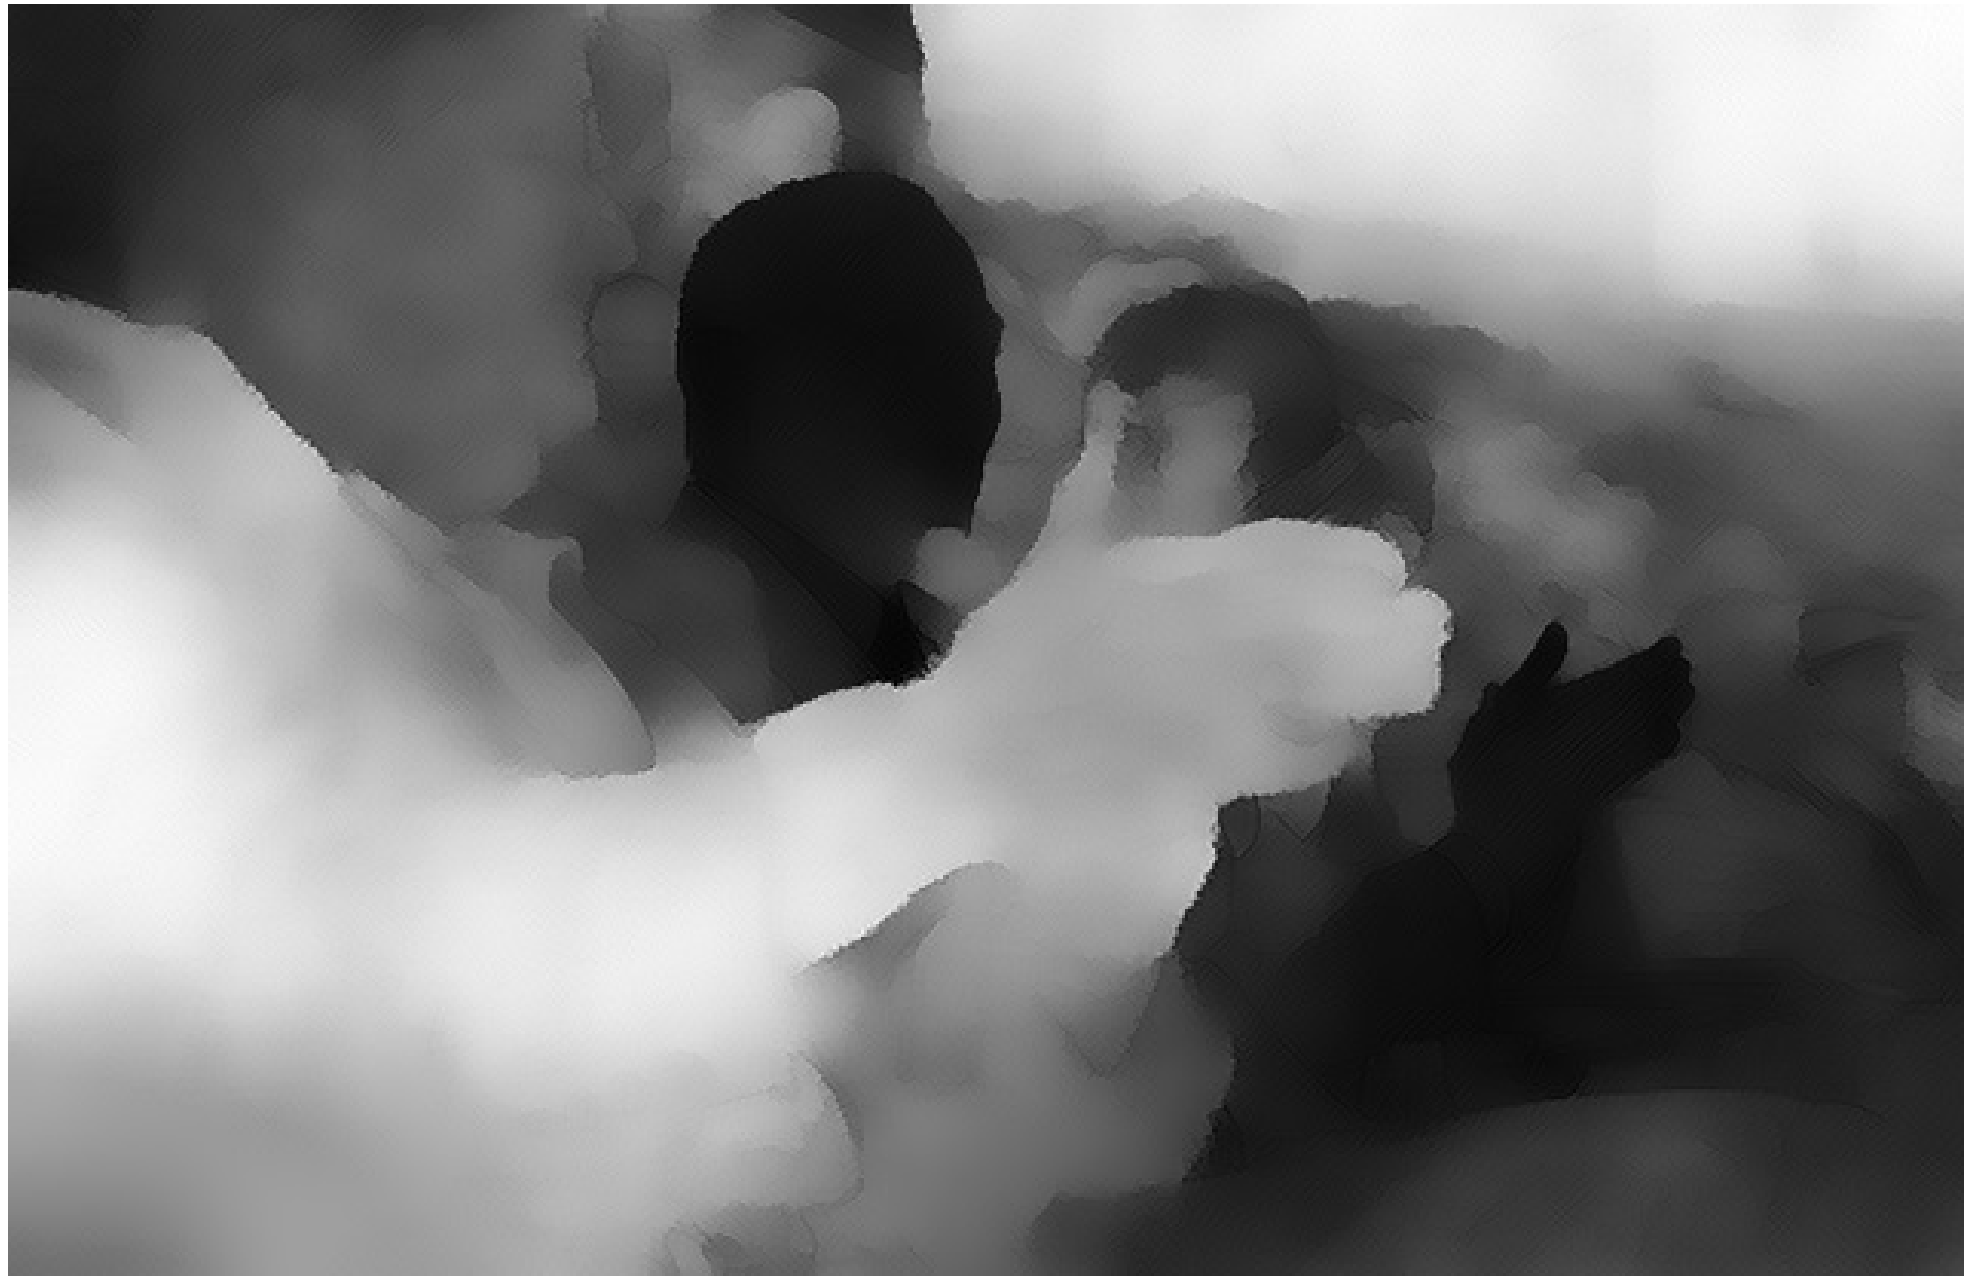

$DMENet_{BDCS}^{w/o L_{aux}}$

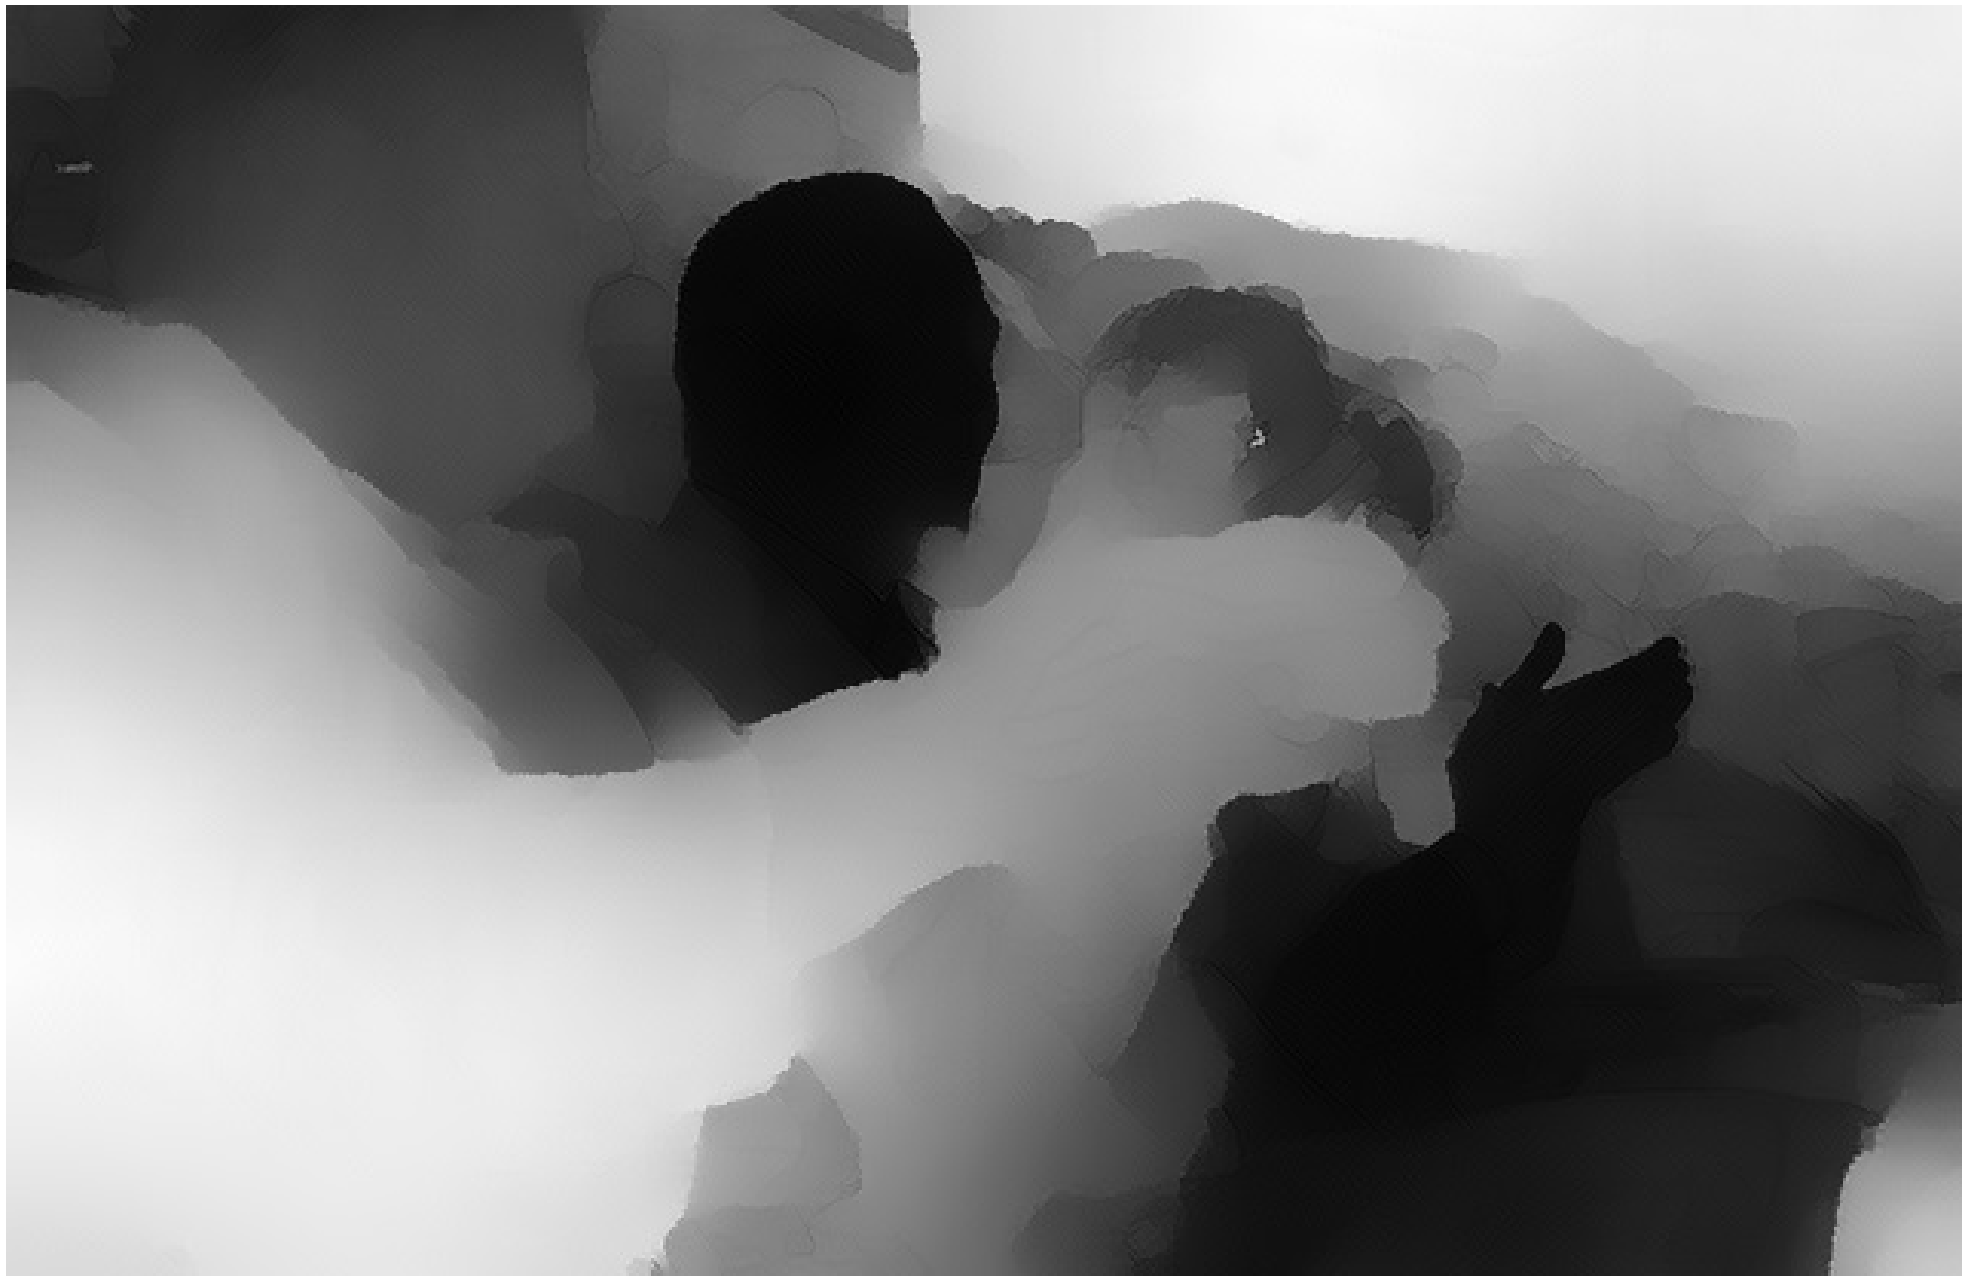

*DMENet<sub>BDCS</sub>*

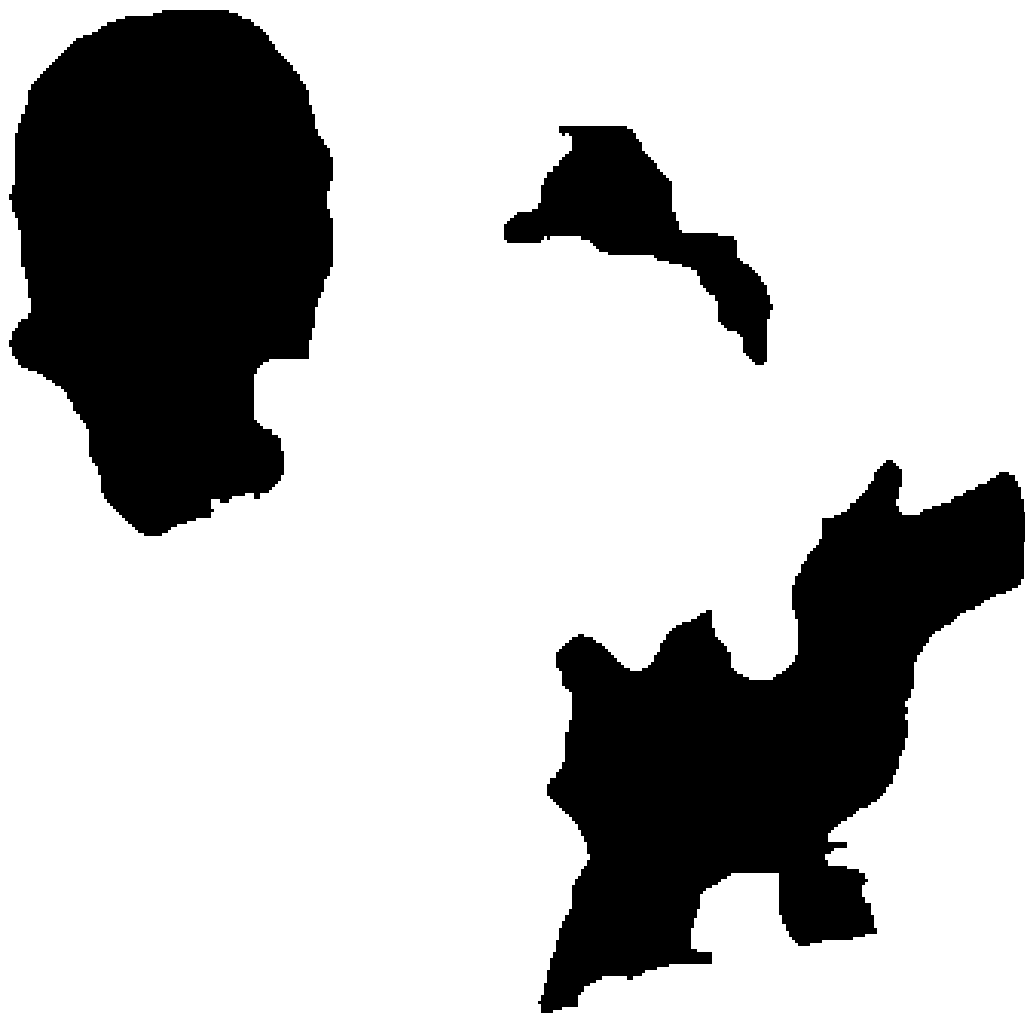

GT (Binary blur map)

Figure 6: Qualitative comparison with [7].

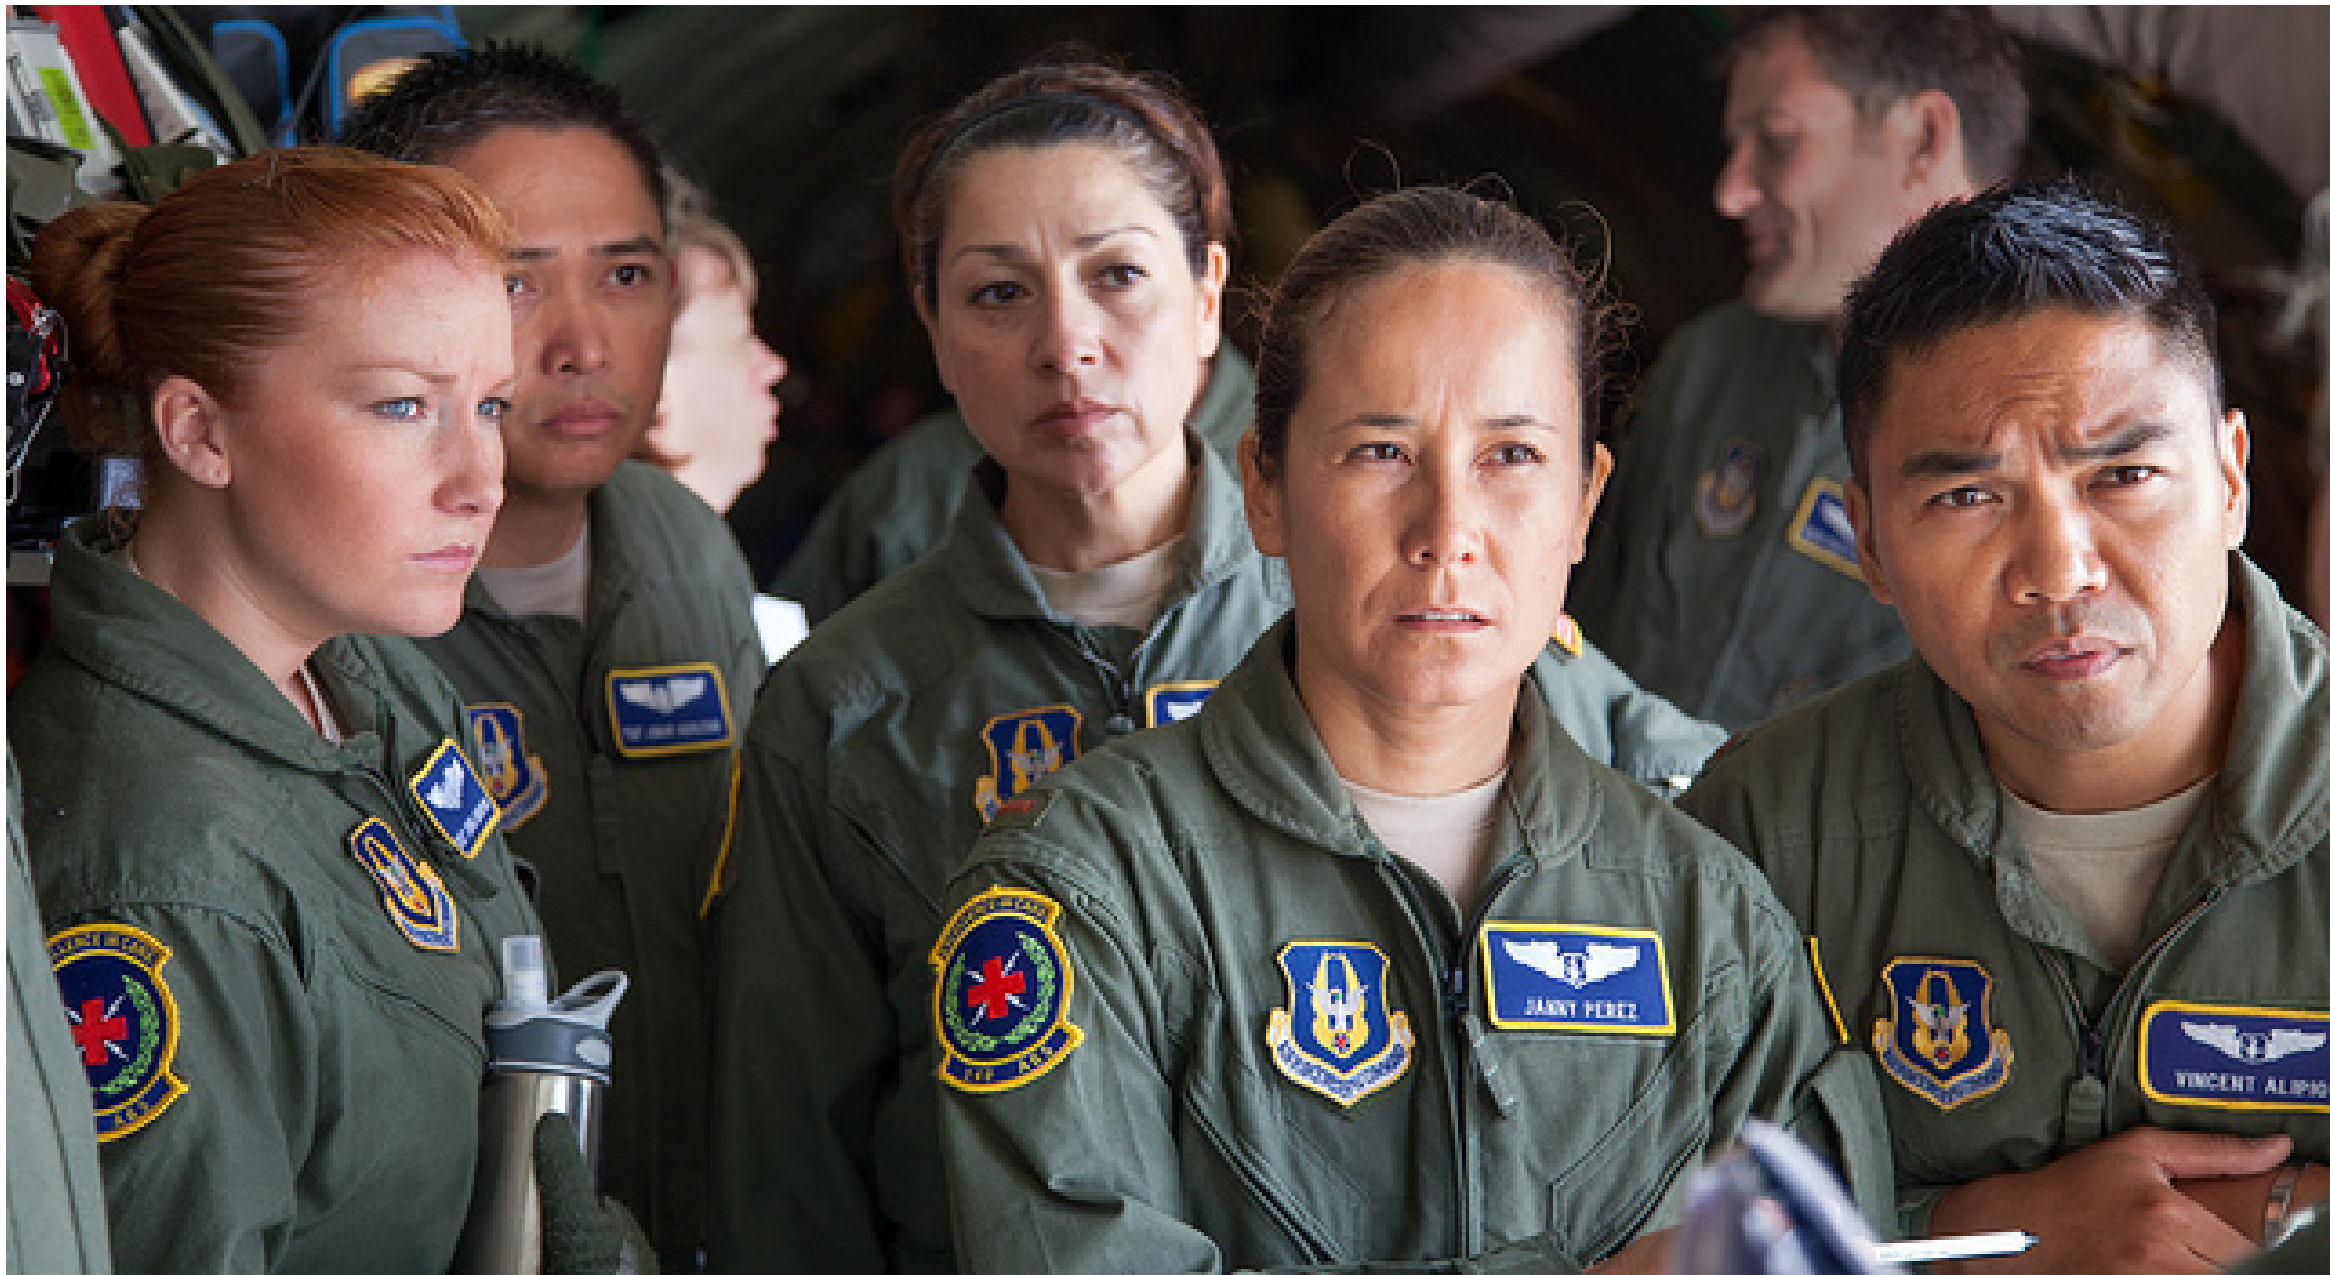

Input

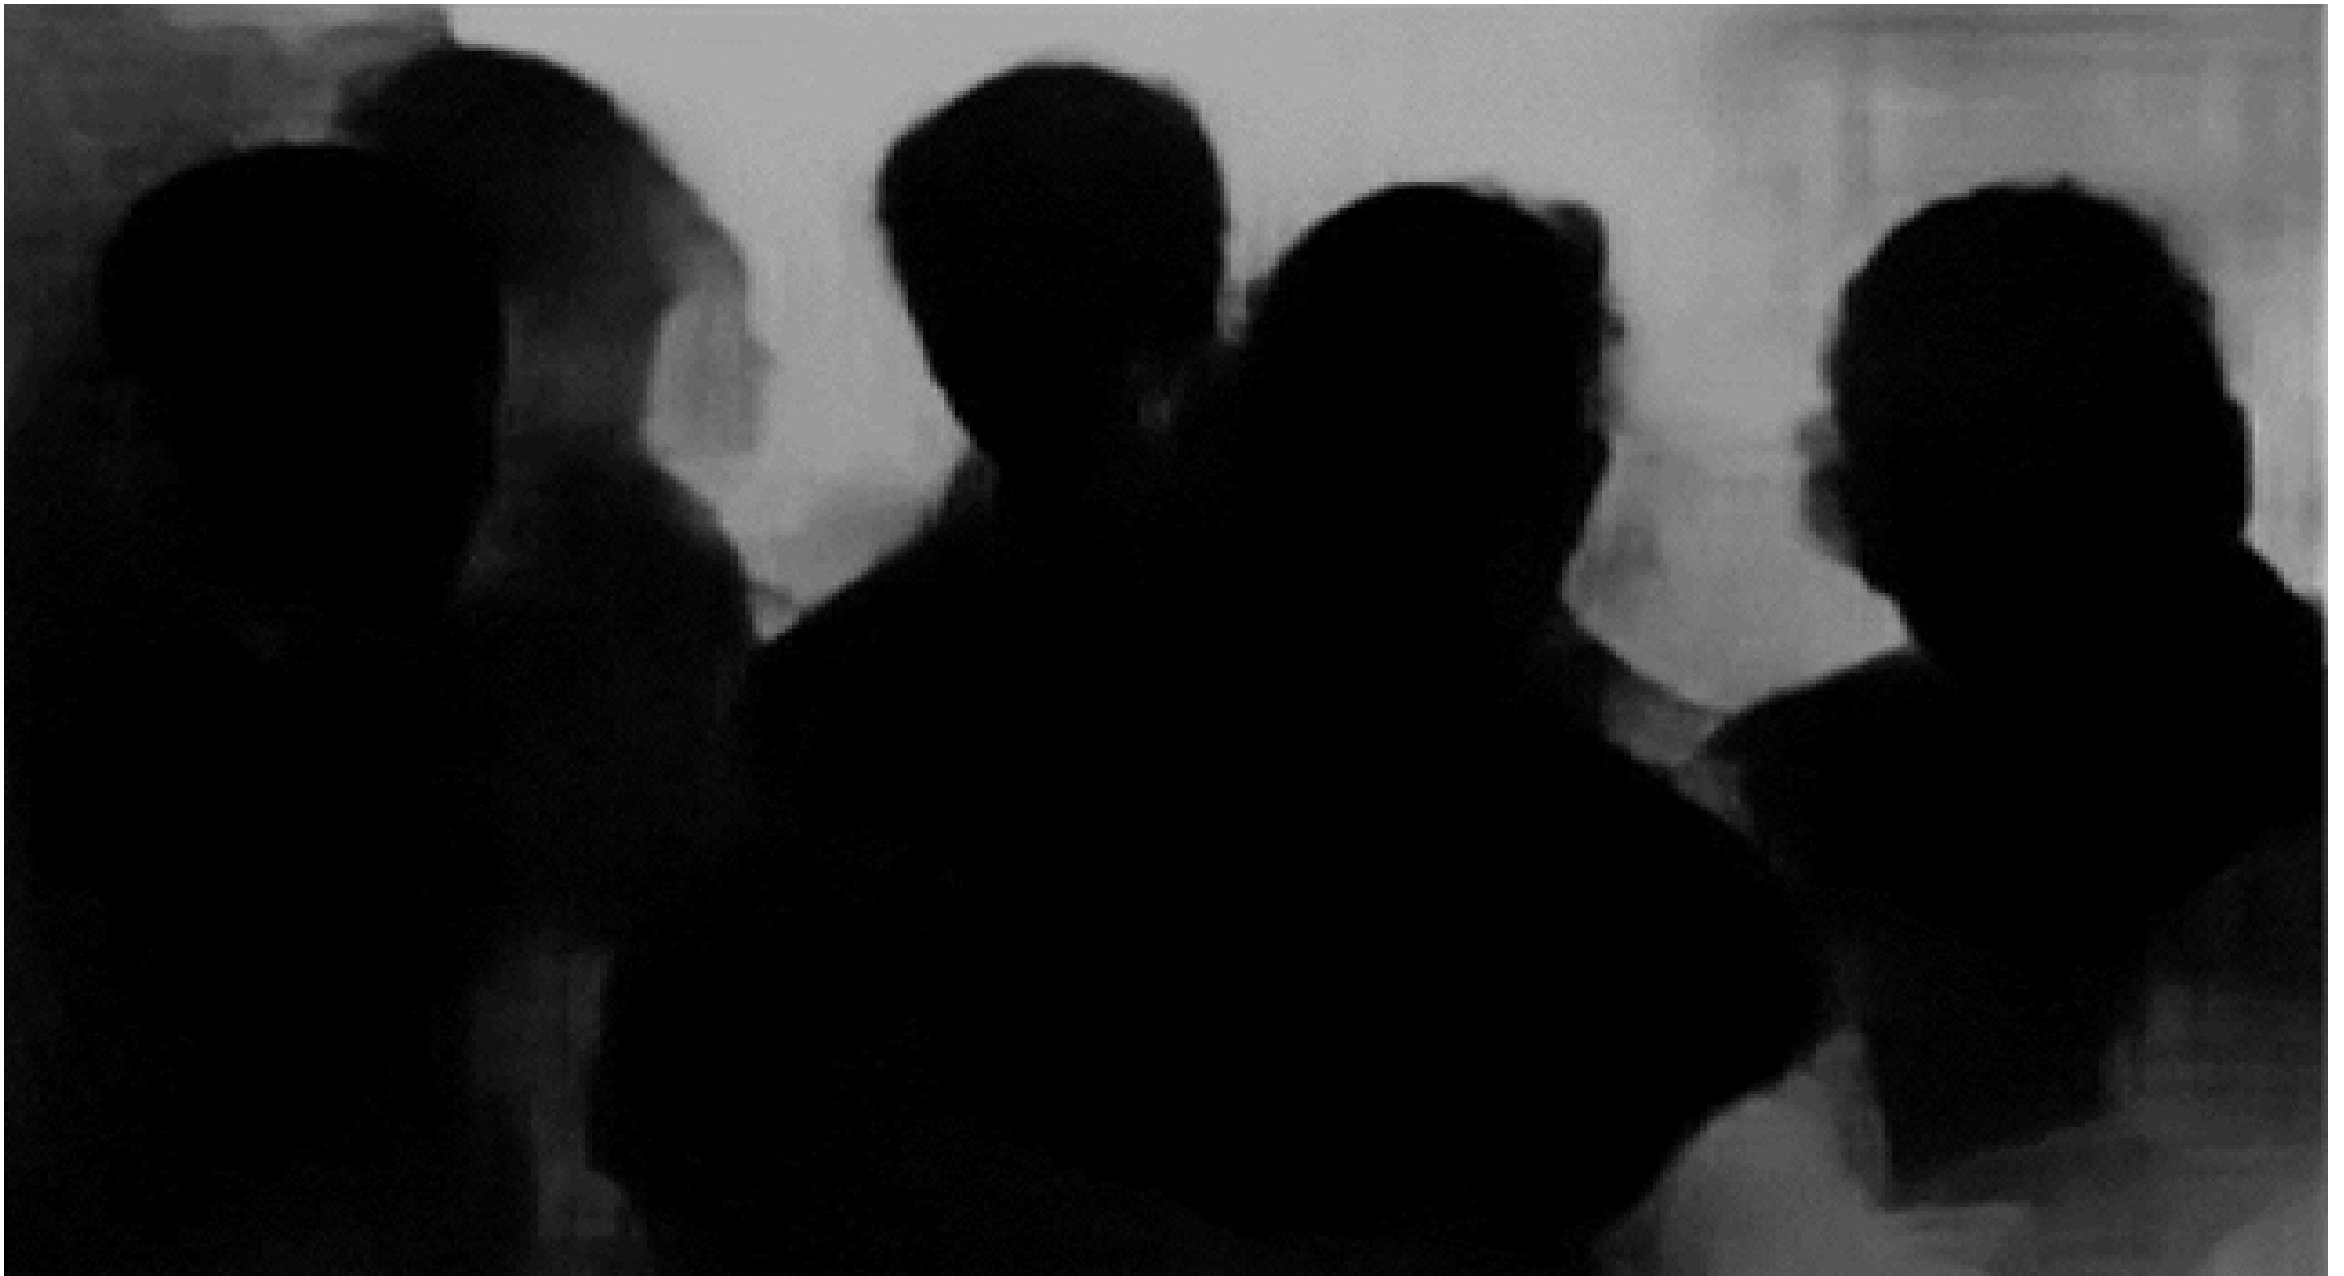

Defocus map estimated by [7]

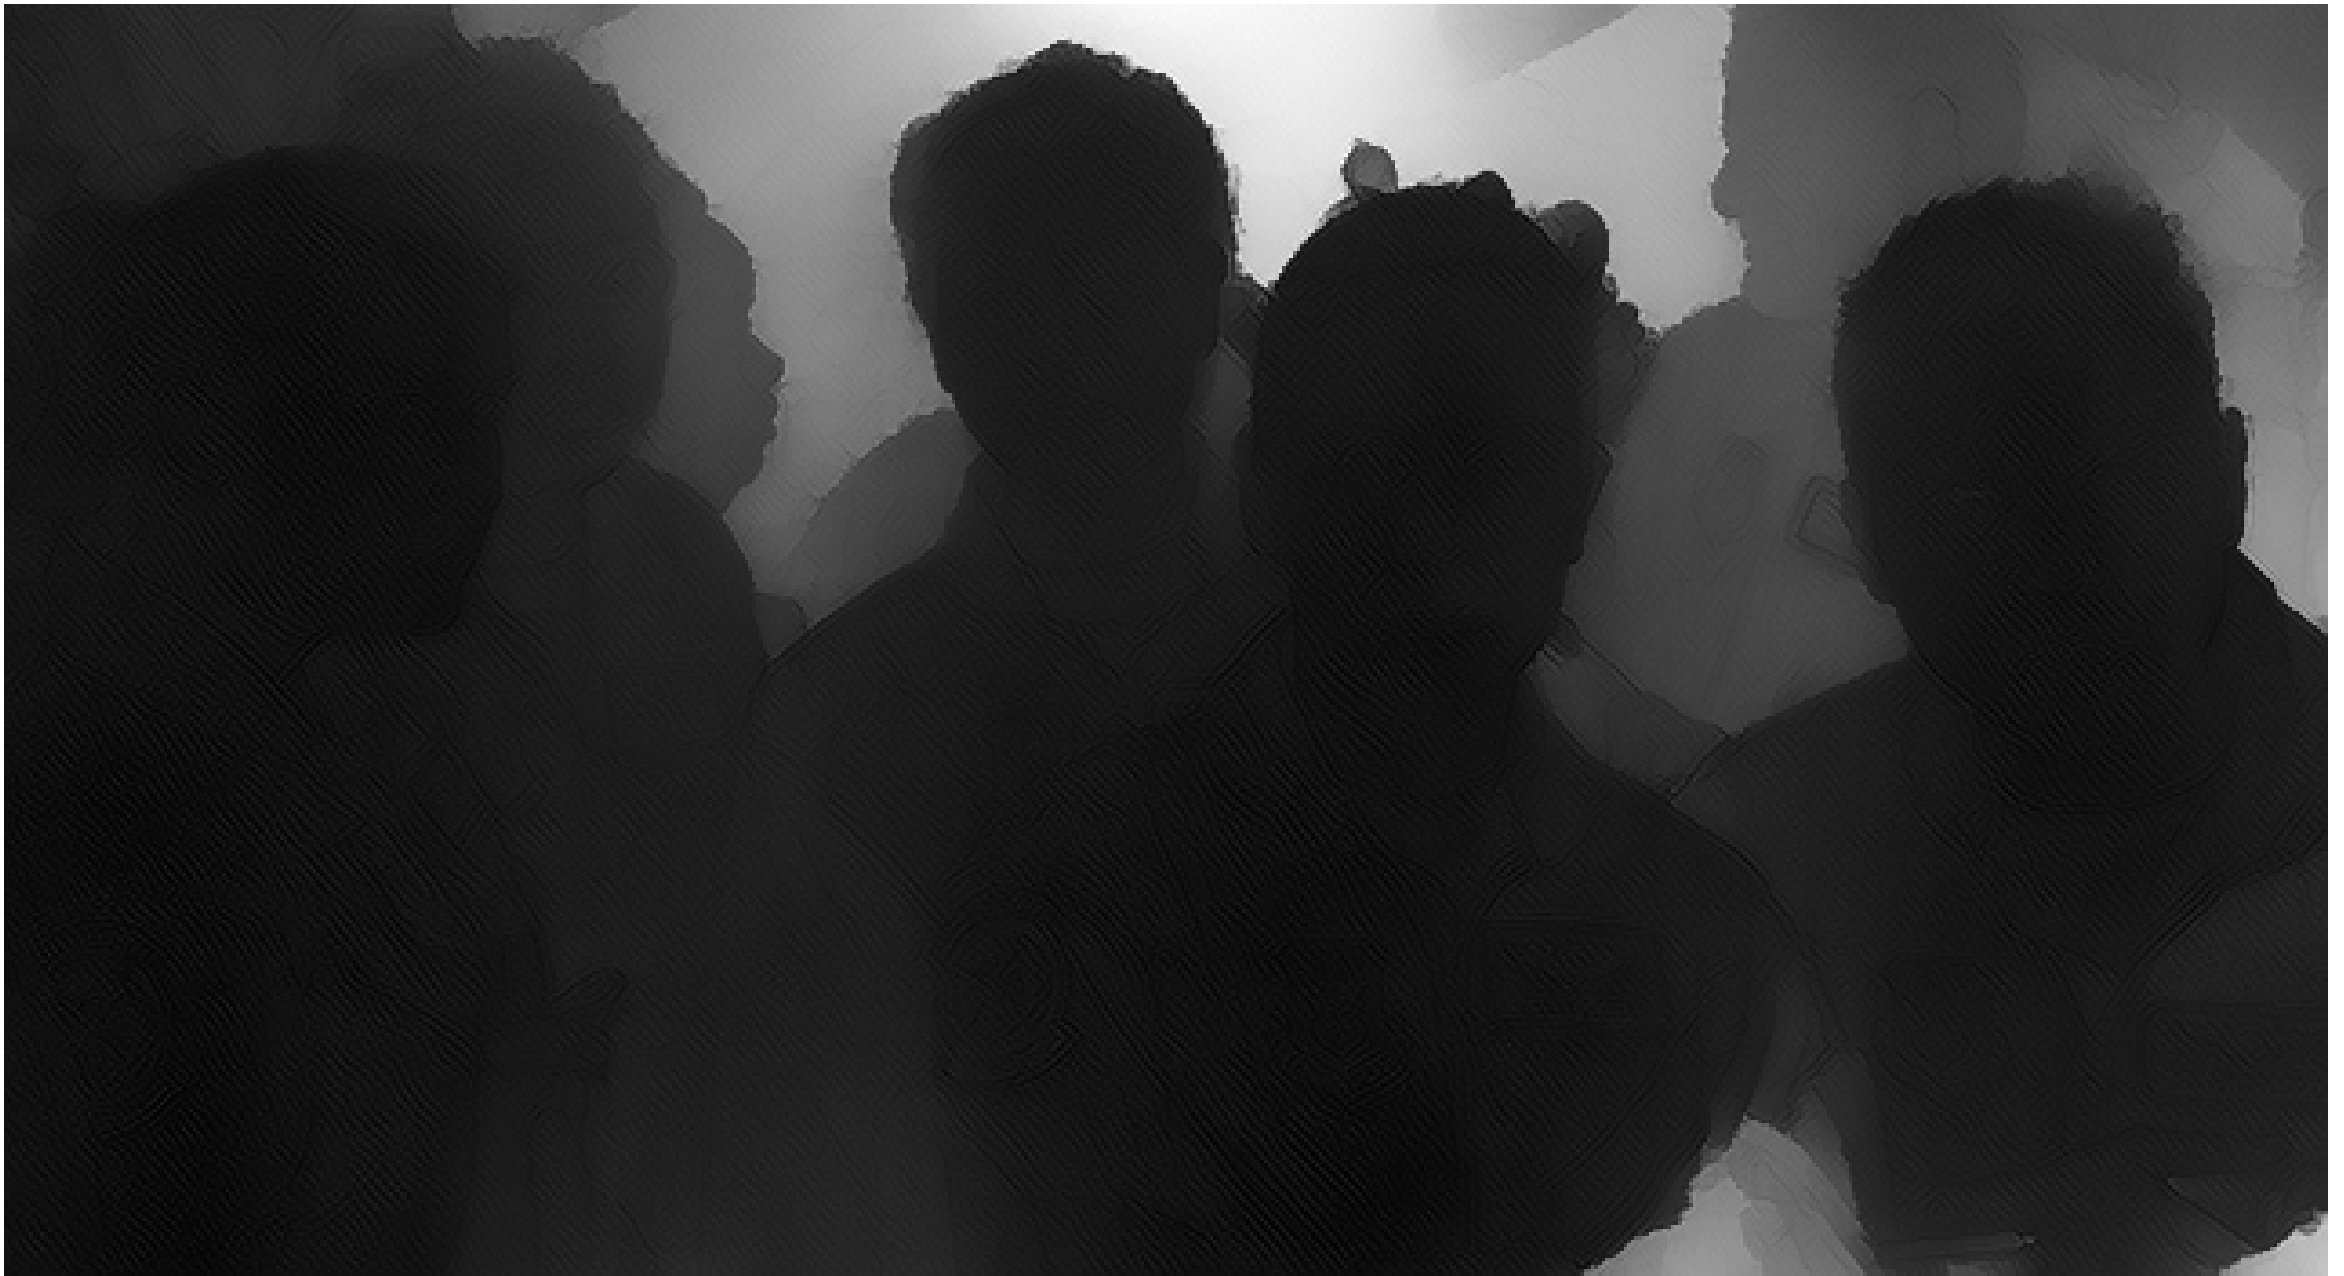

Defocus map estimated by ours

Figure 7: Qualitative comparison between  $DMENet_{BDCS}$  and other methods.

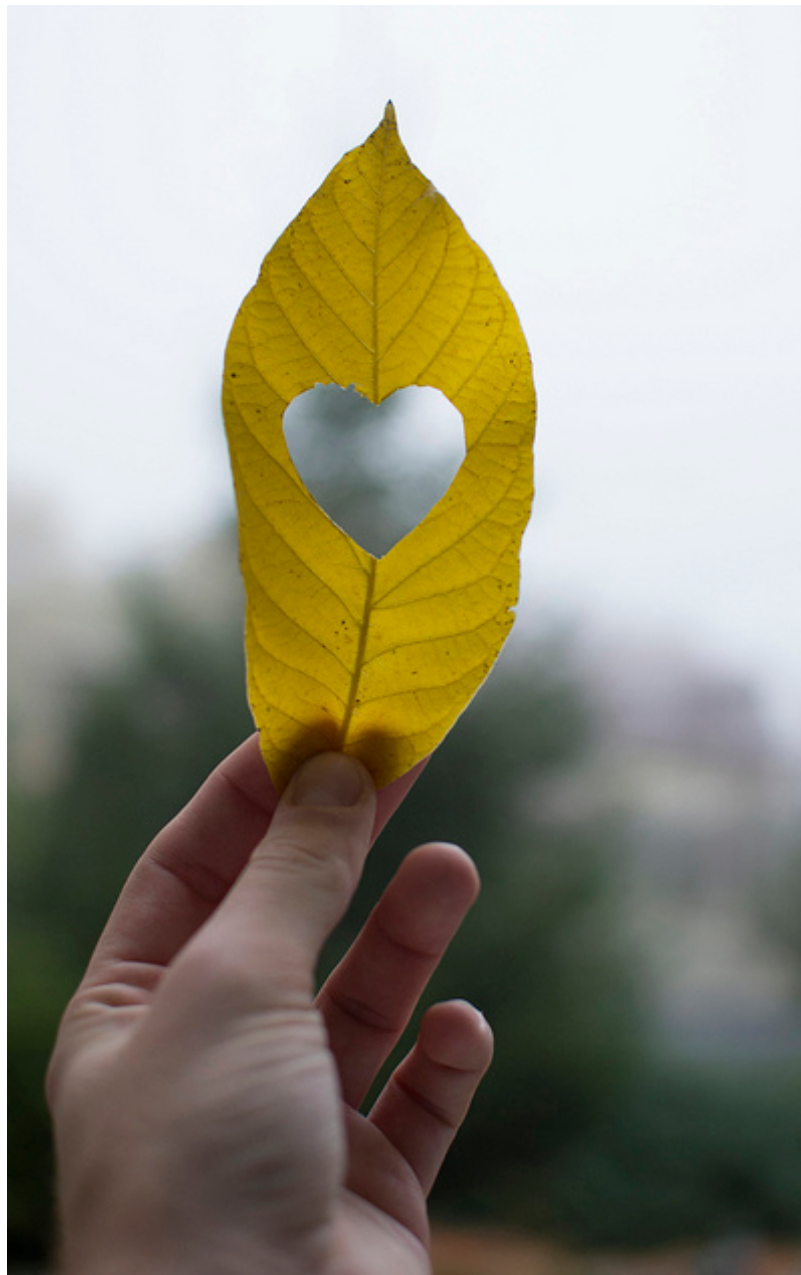

Input

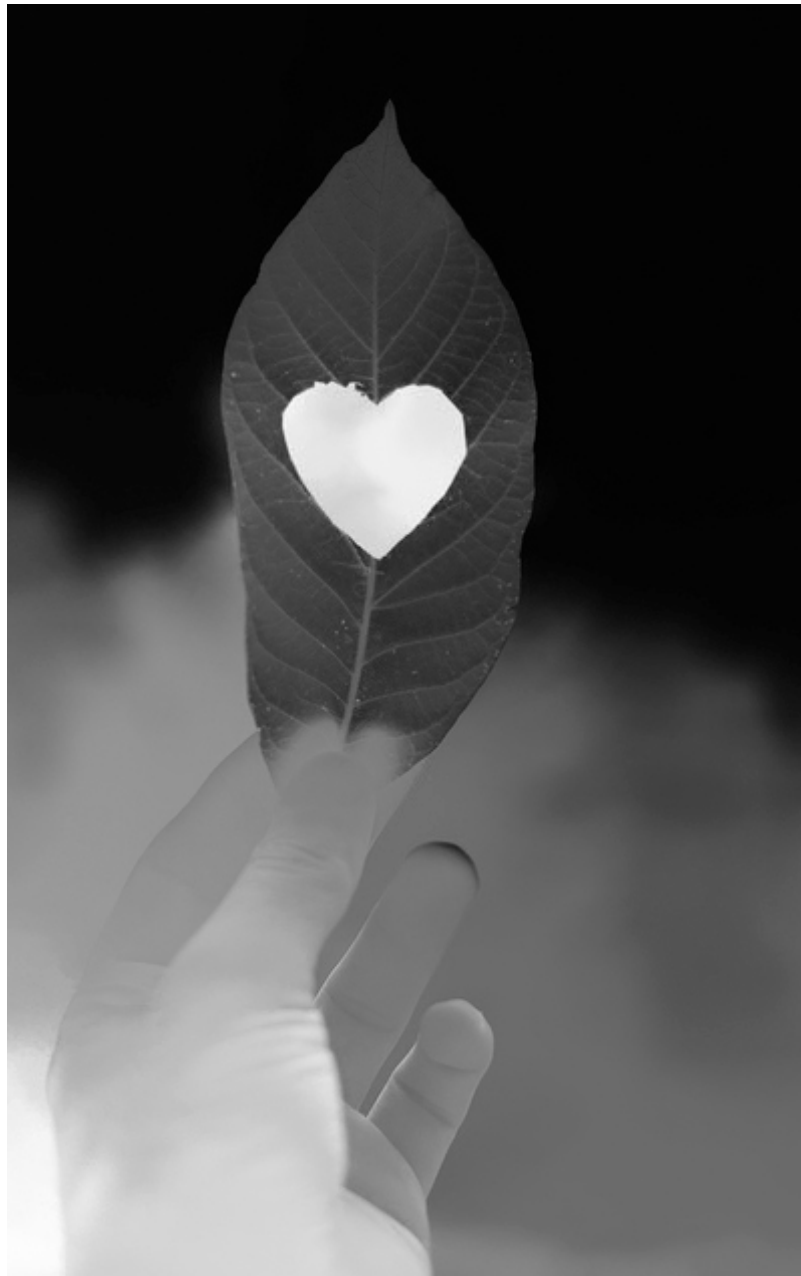

Zhou *et al.*[3]

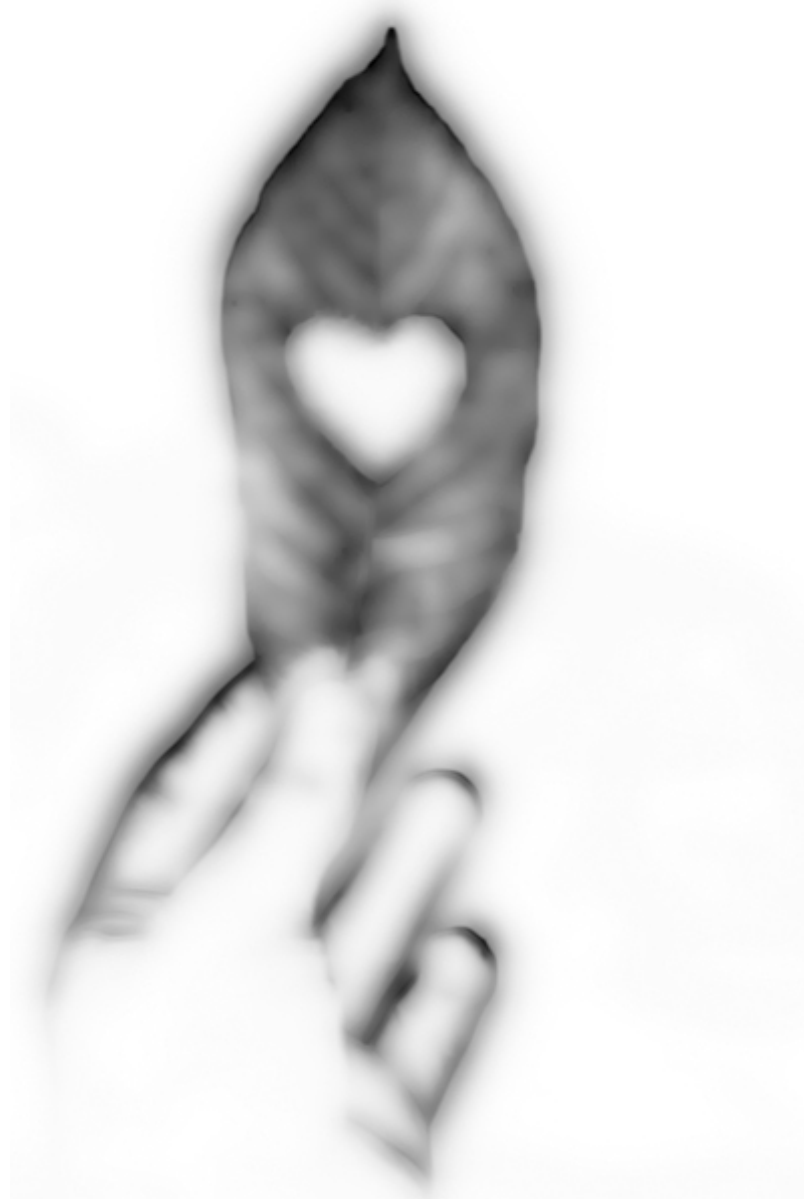

Shi *et al.* [4]

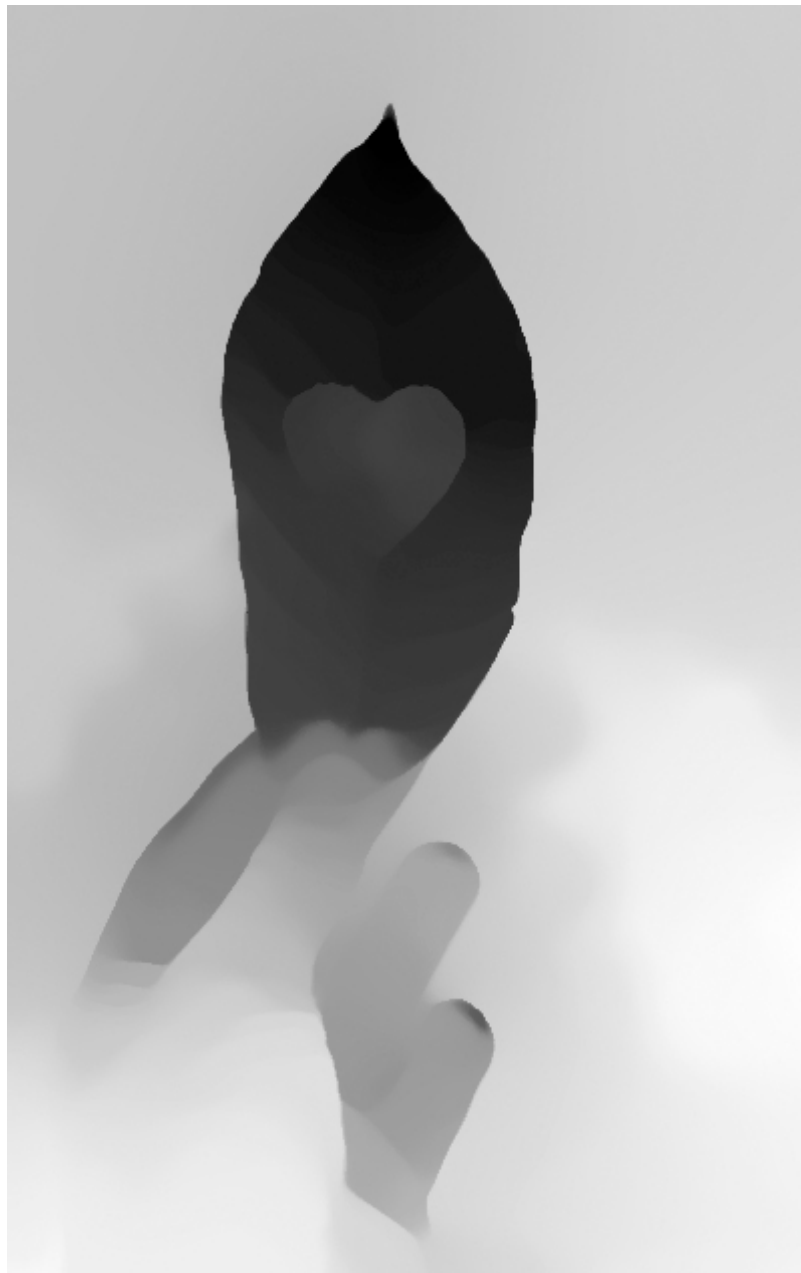

Park *et al.* [5]

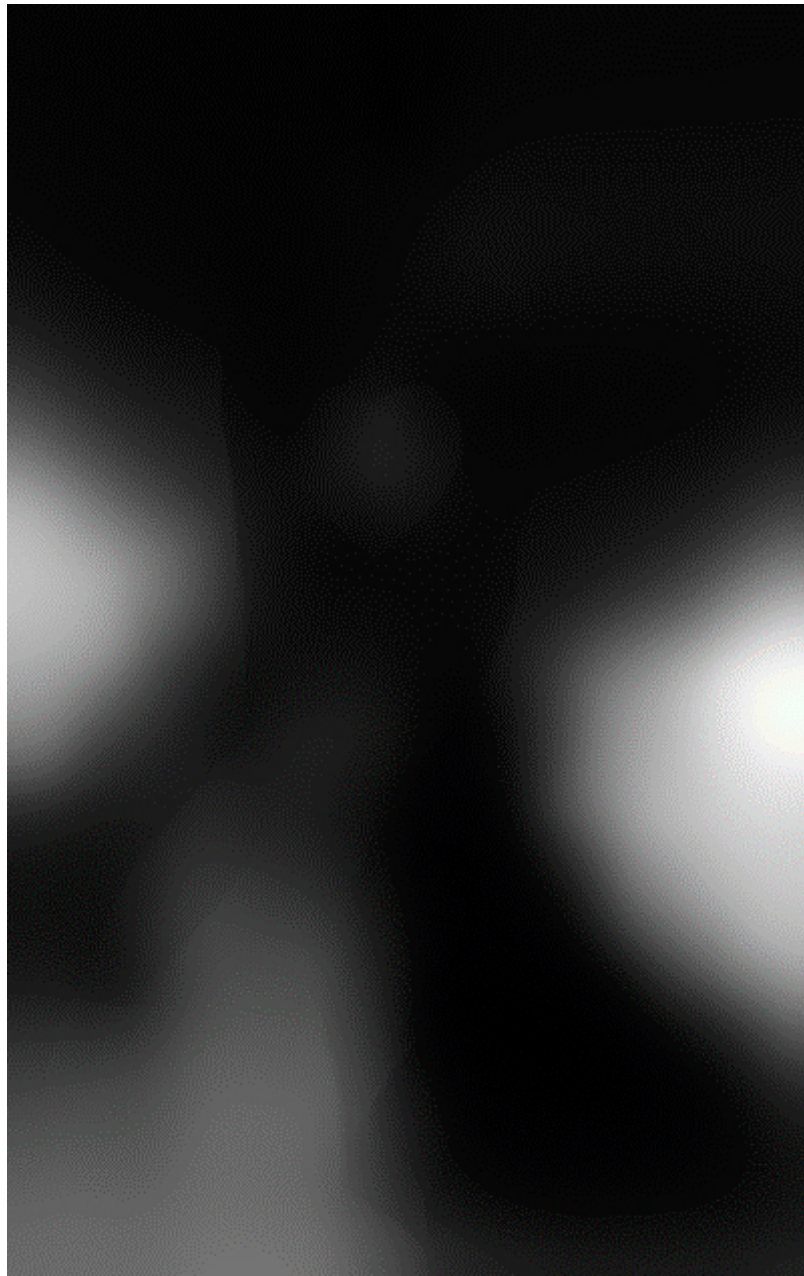

Karaali *et al.* [6]

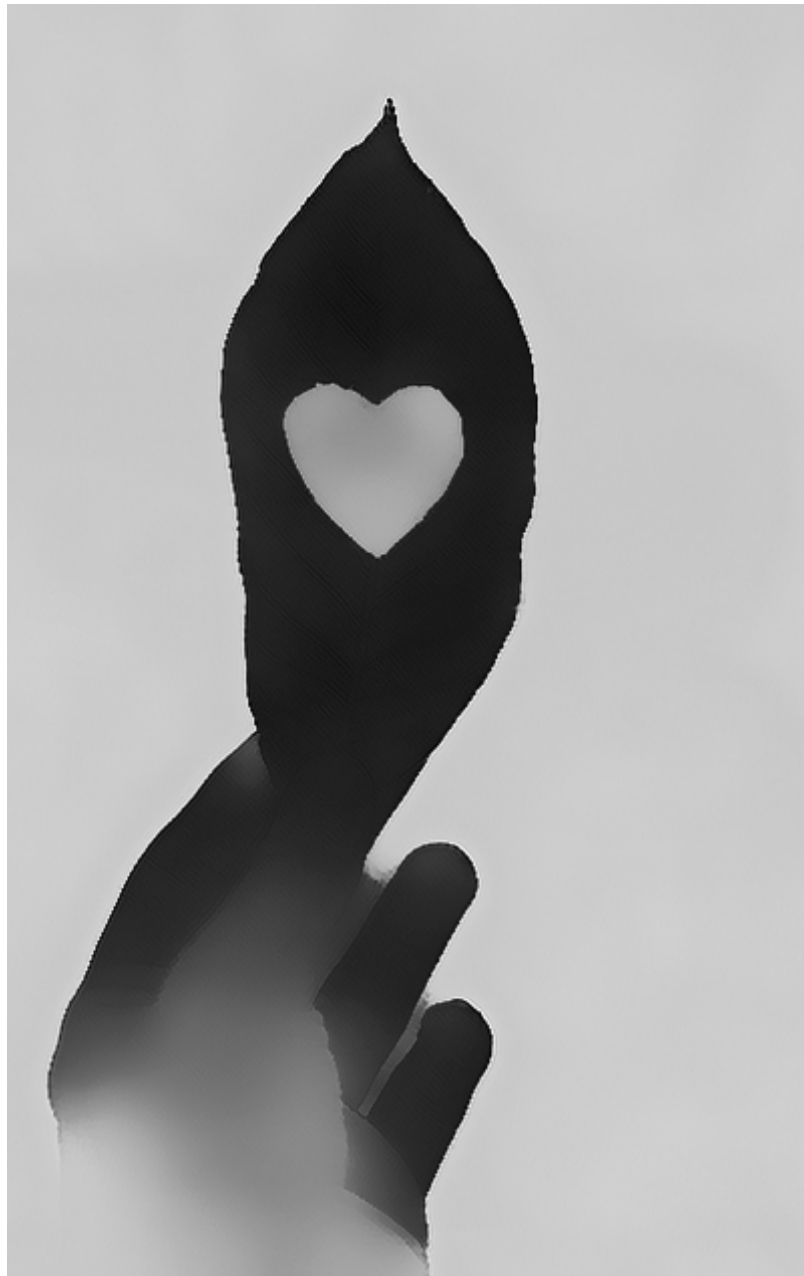

Ours

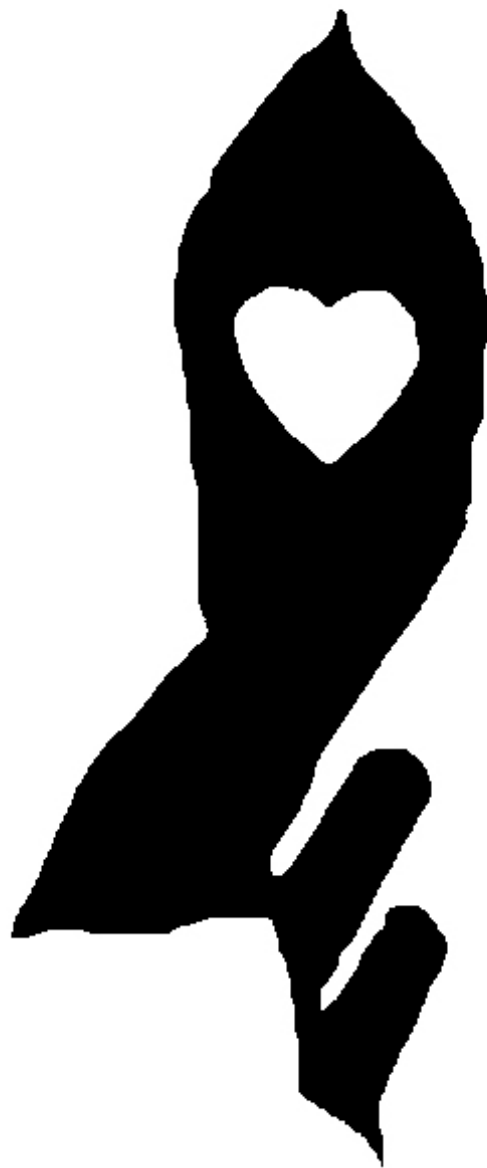

GT (Binary blur map)

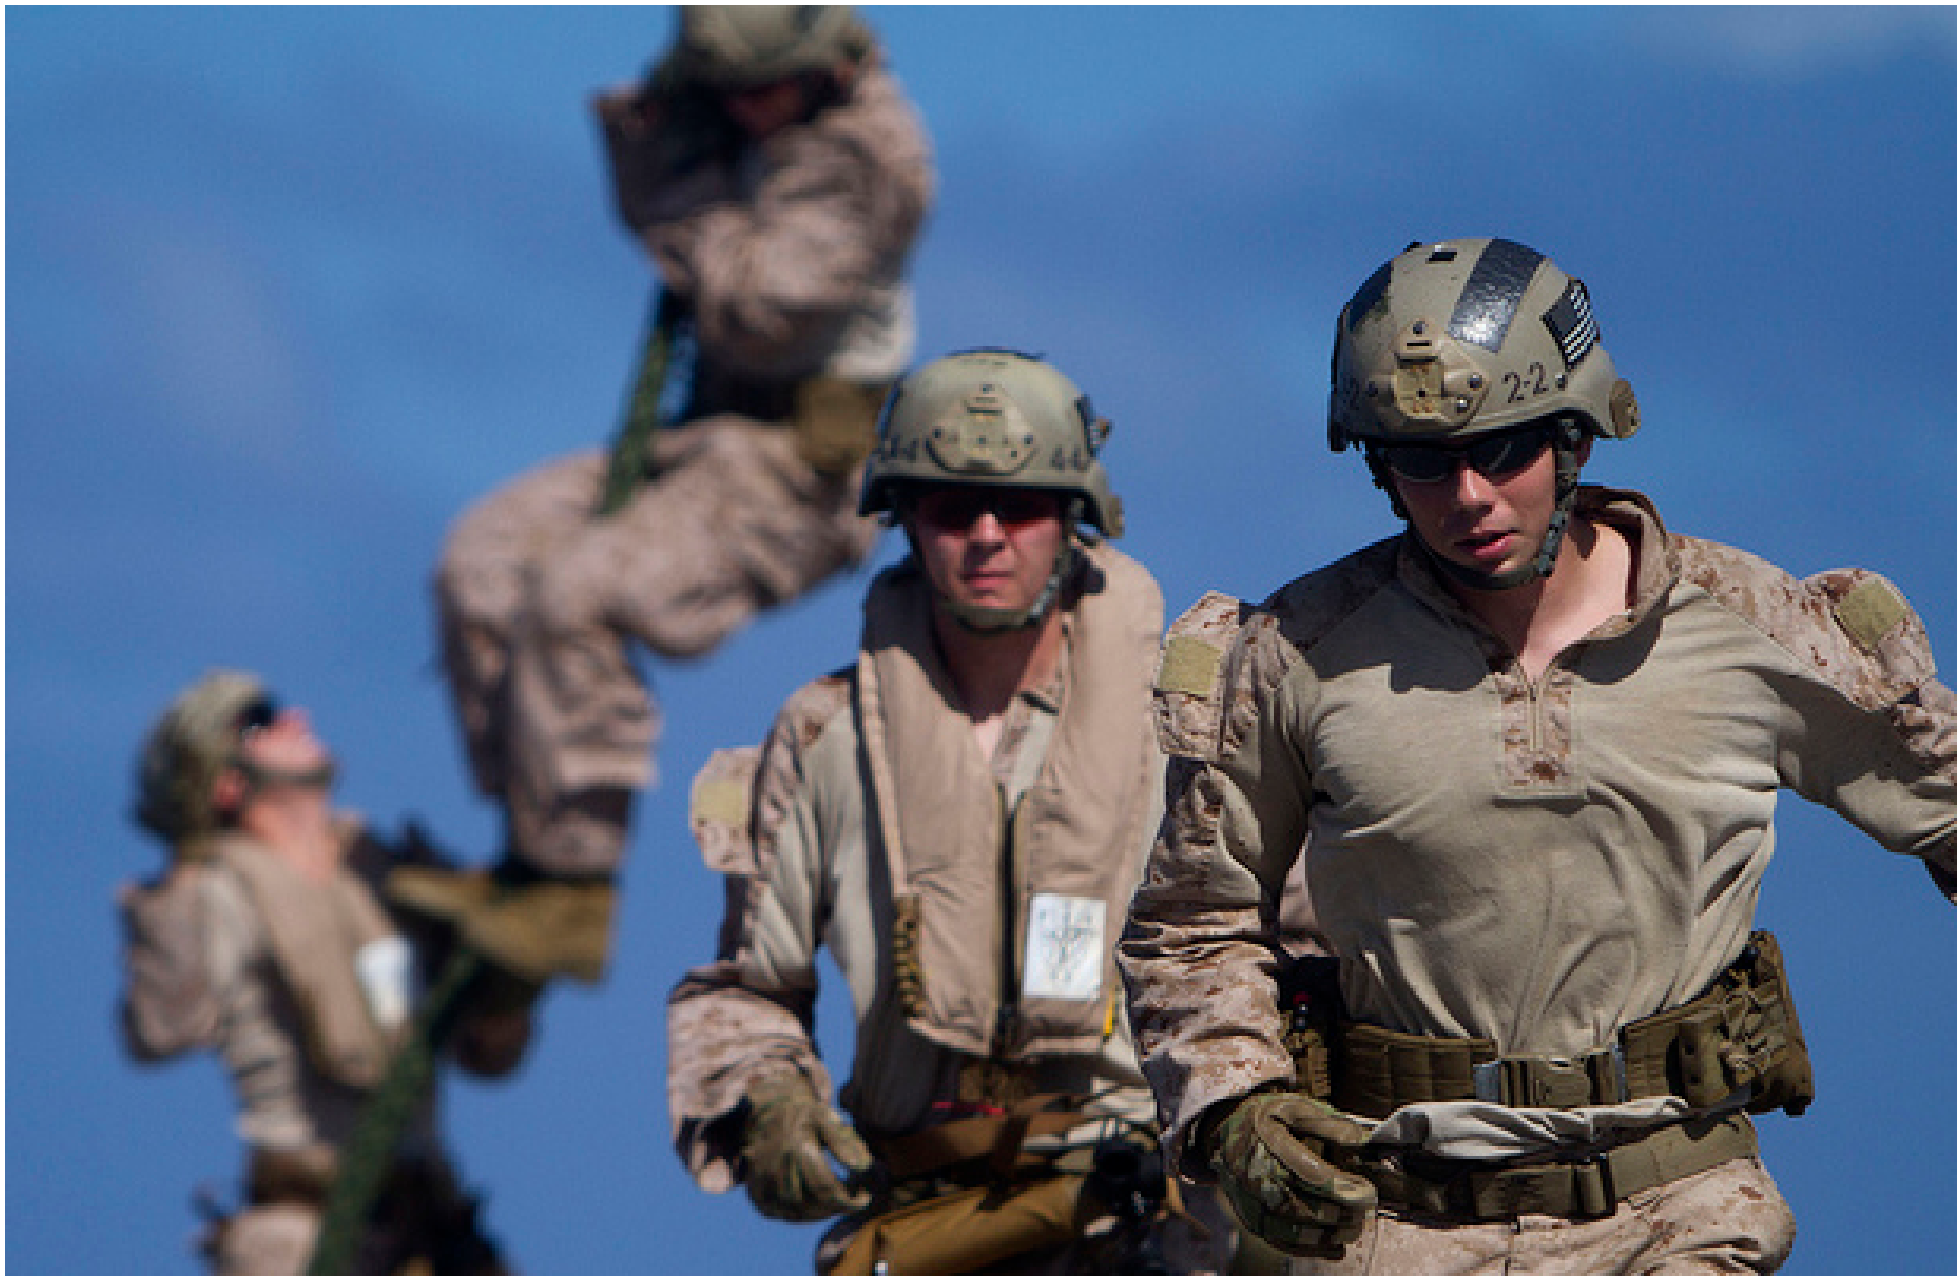

Input

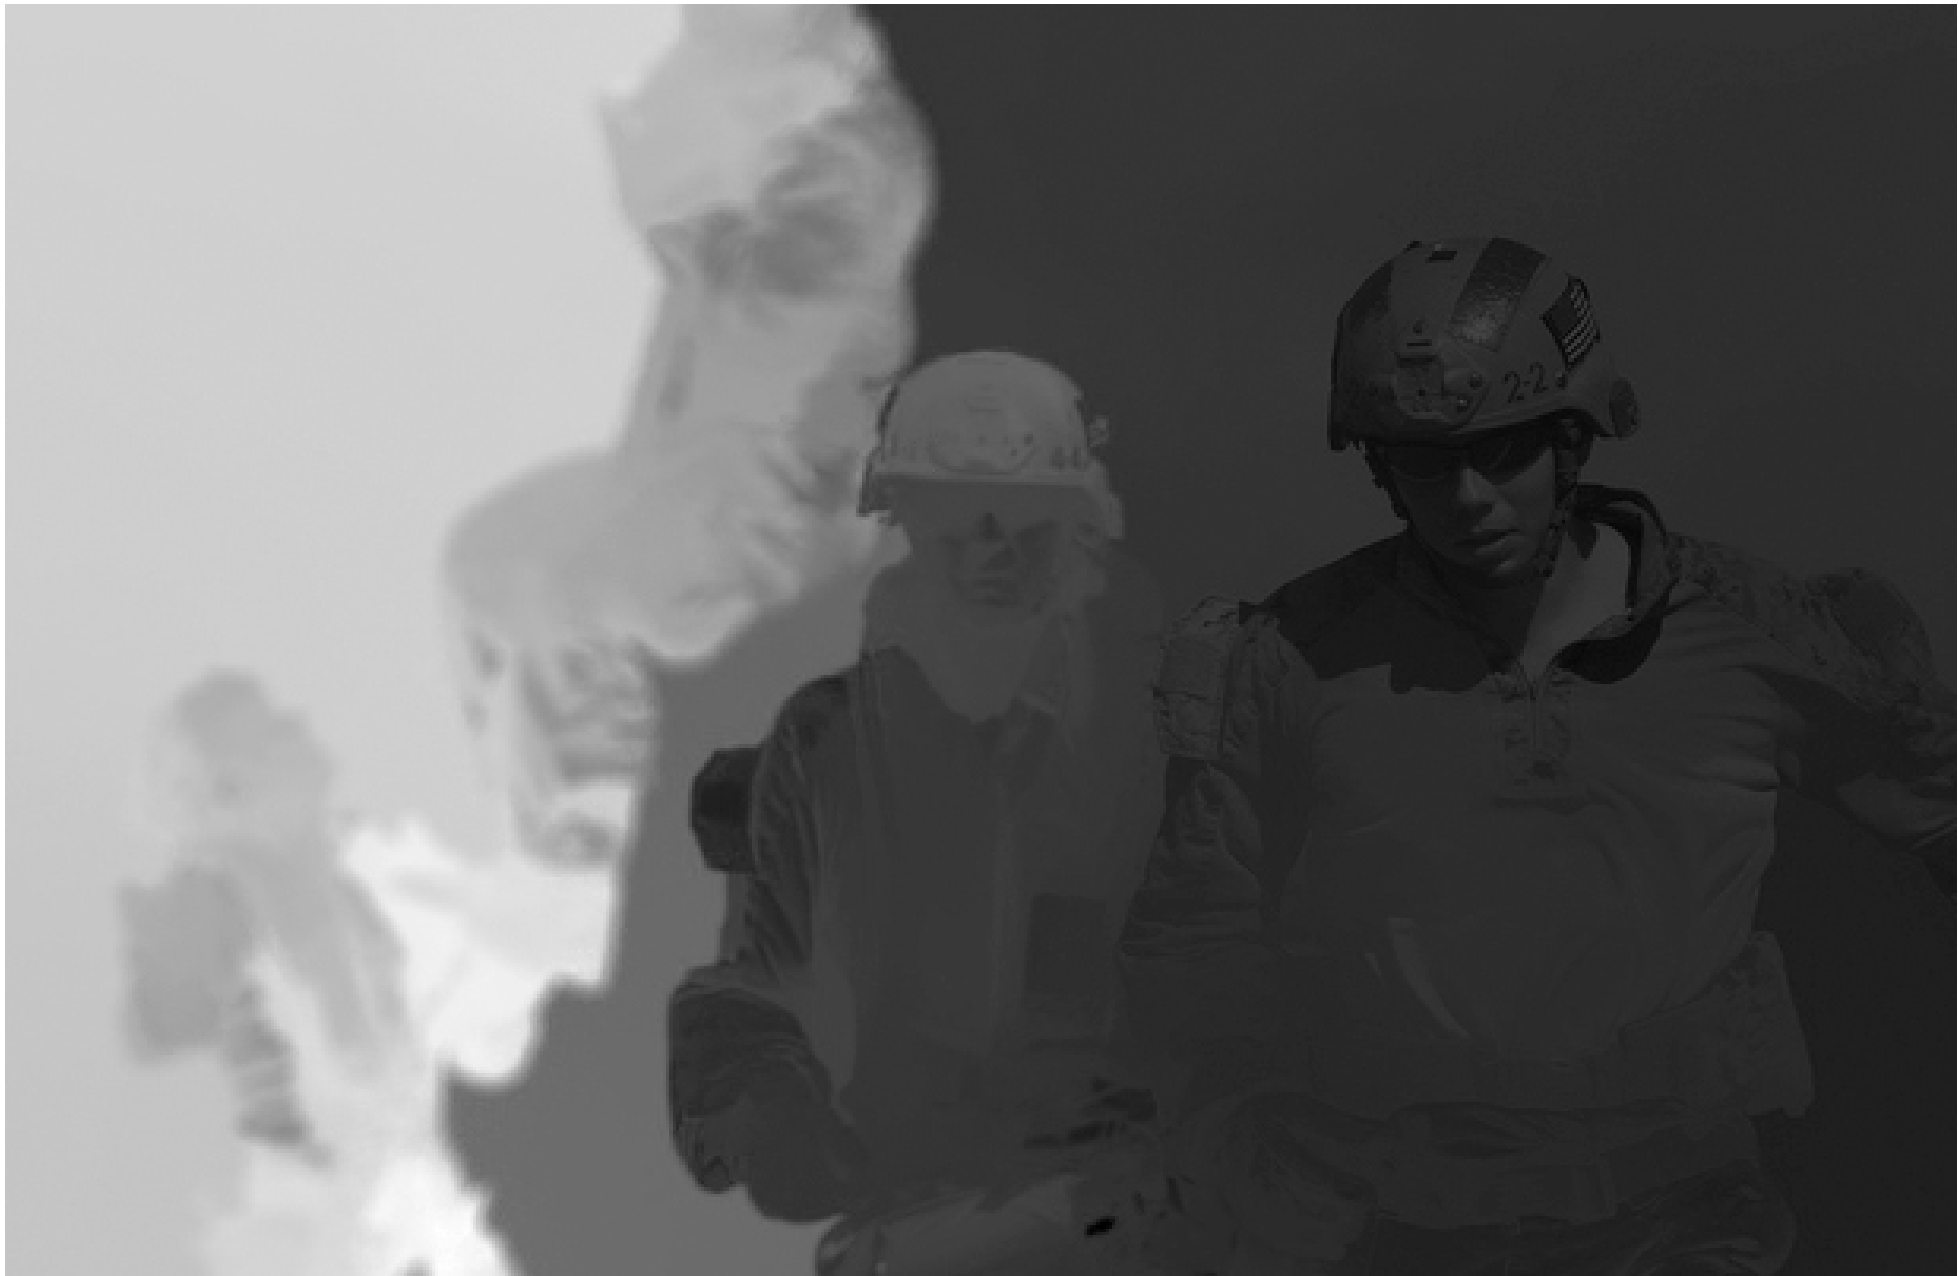

Zhou *et al.*[3]

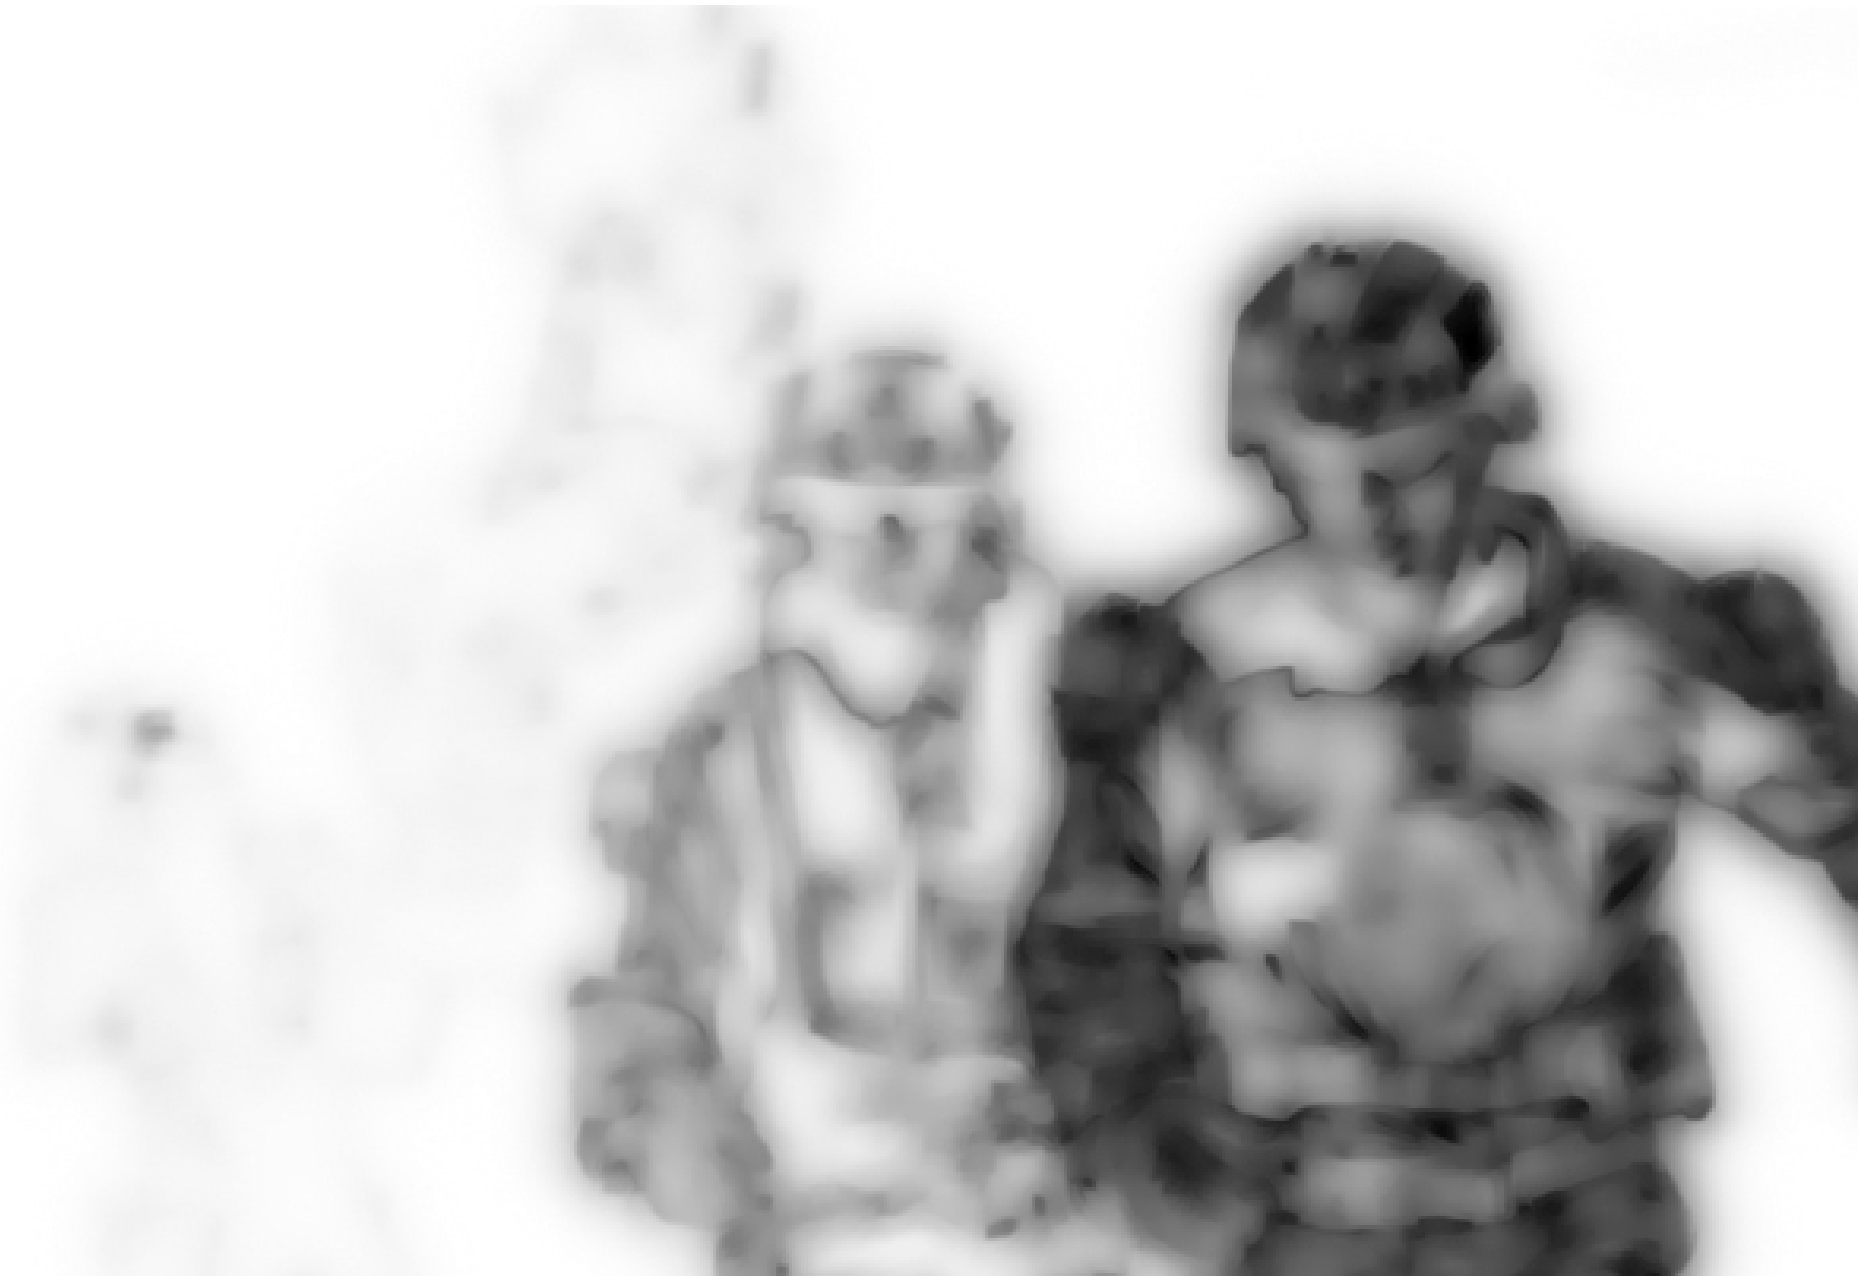

Shi *et al.* [4]

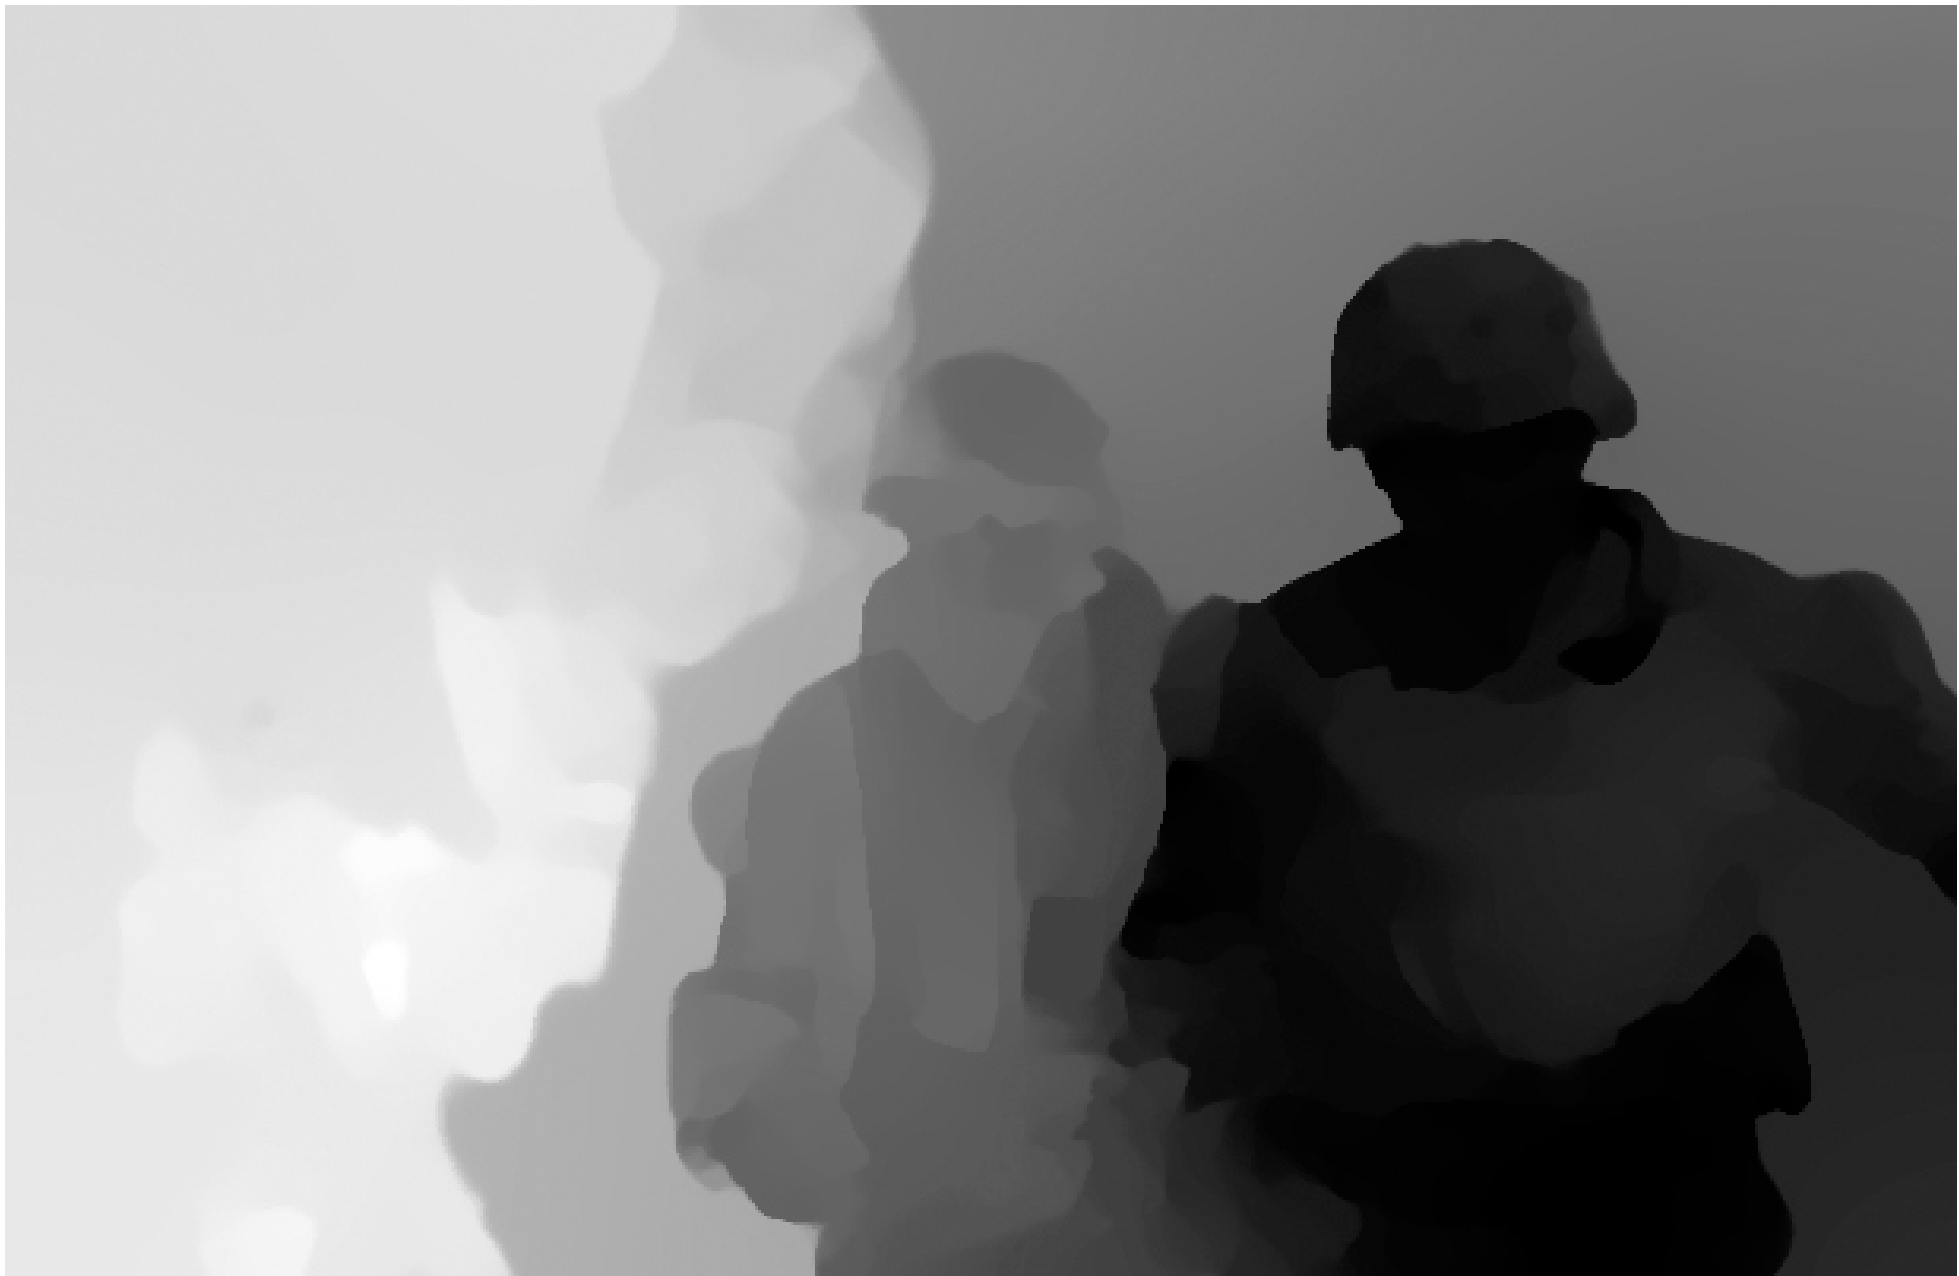

Park *et al.* [5]

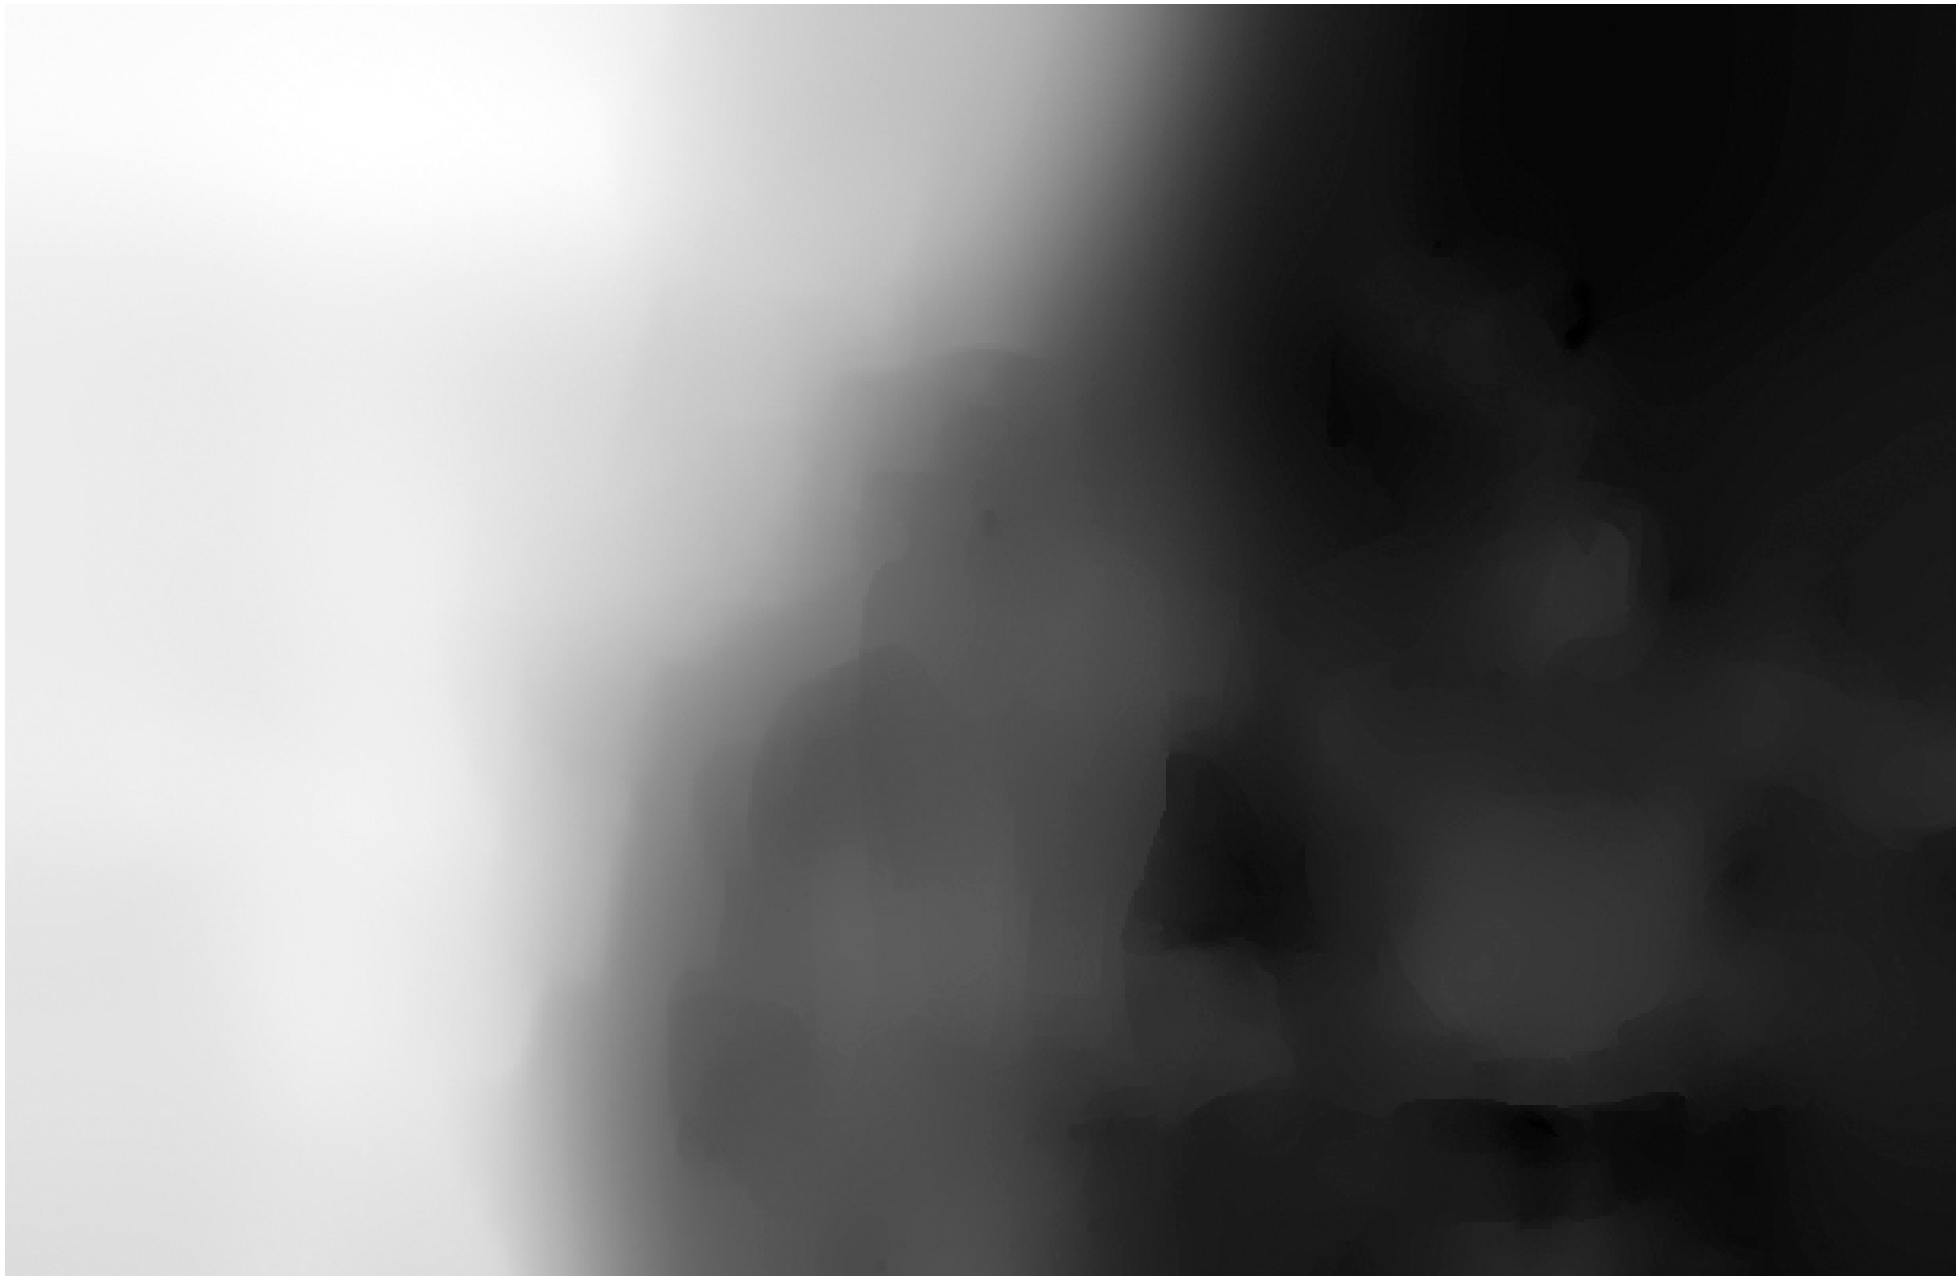

Karaali *et al.* [6]

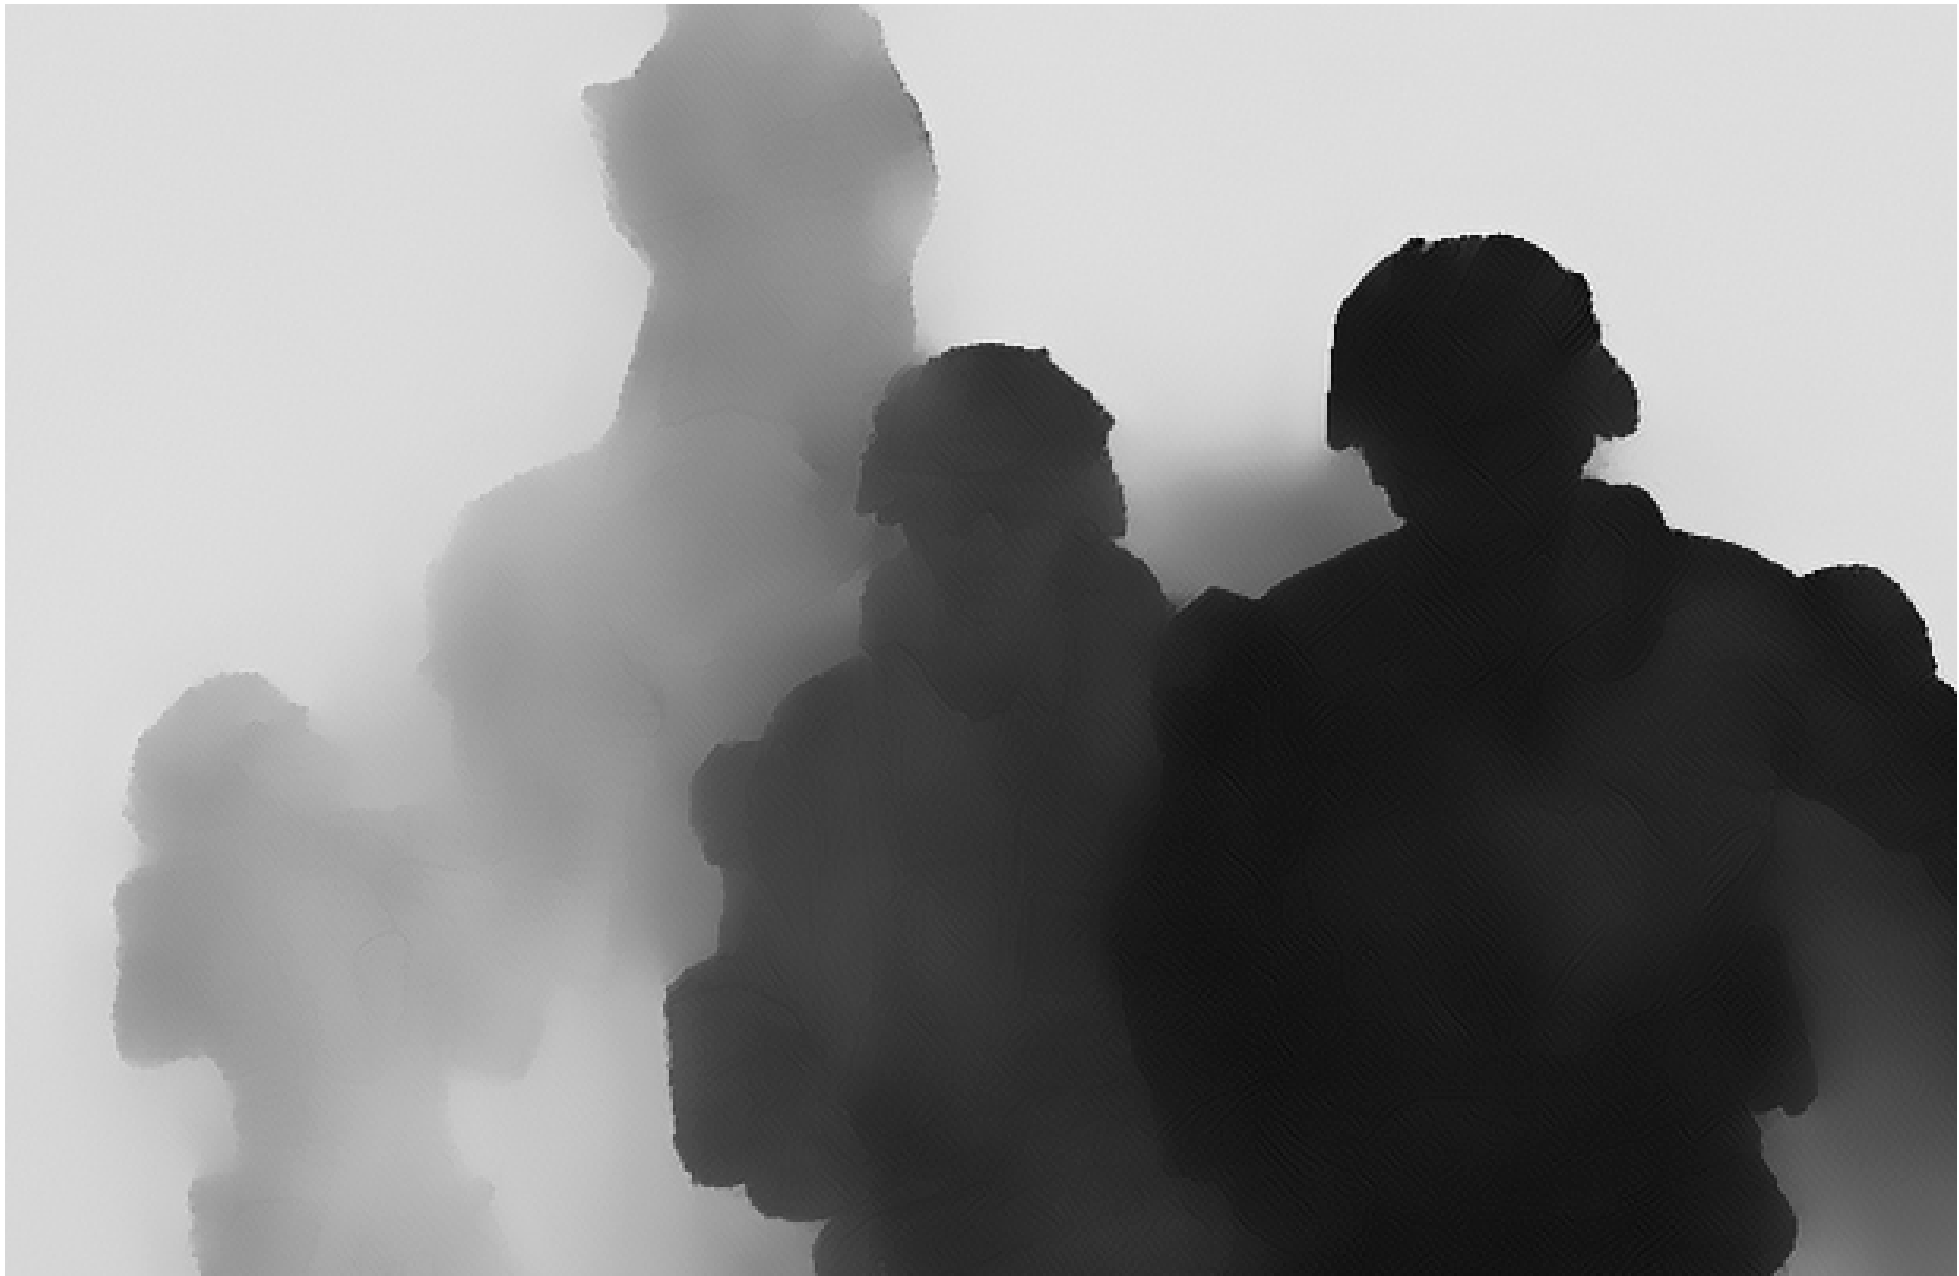

Ours

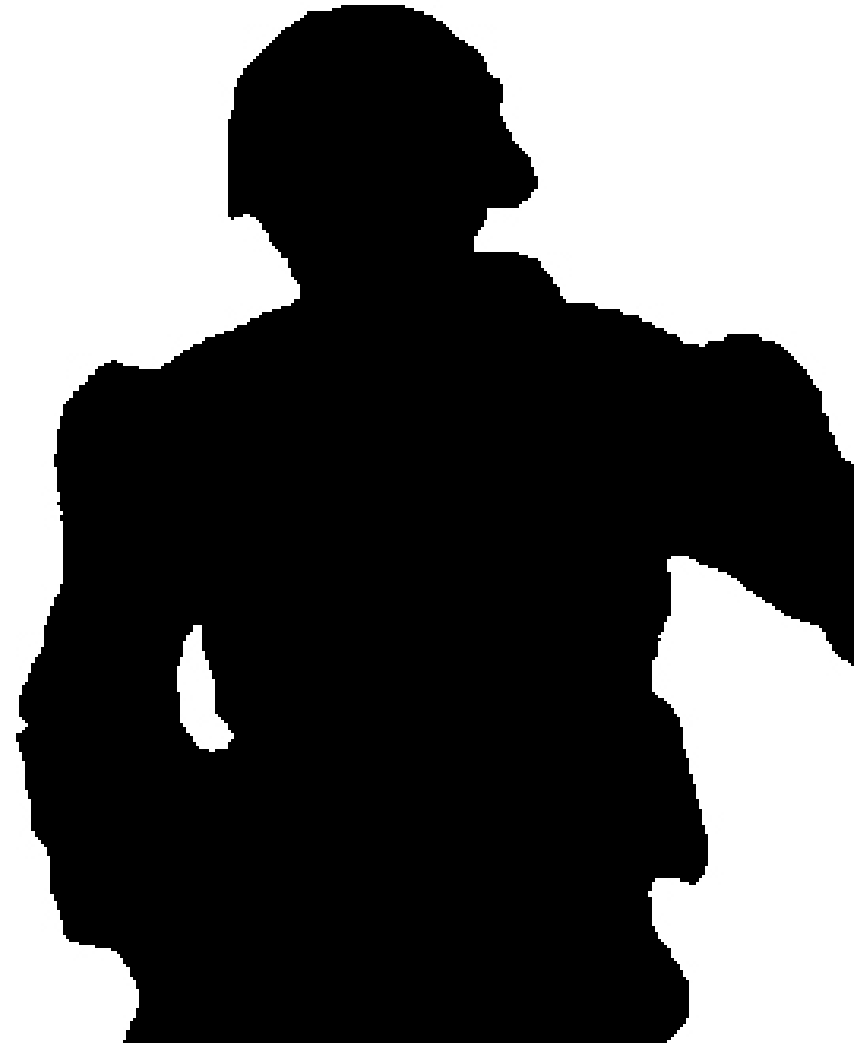

GT (Binary blur map)

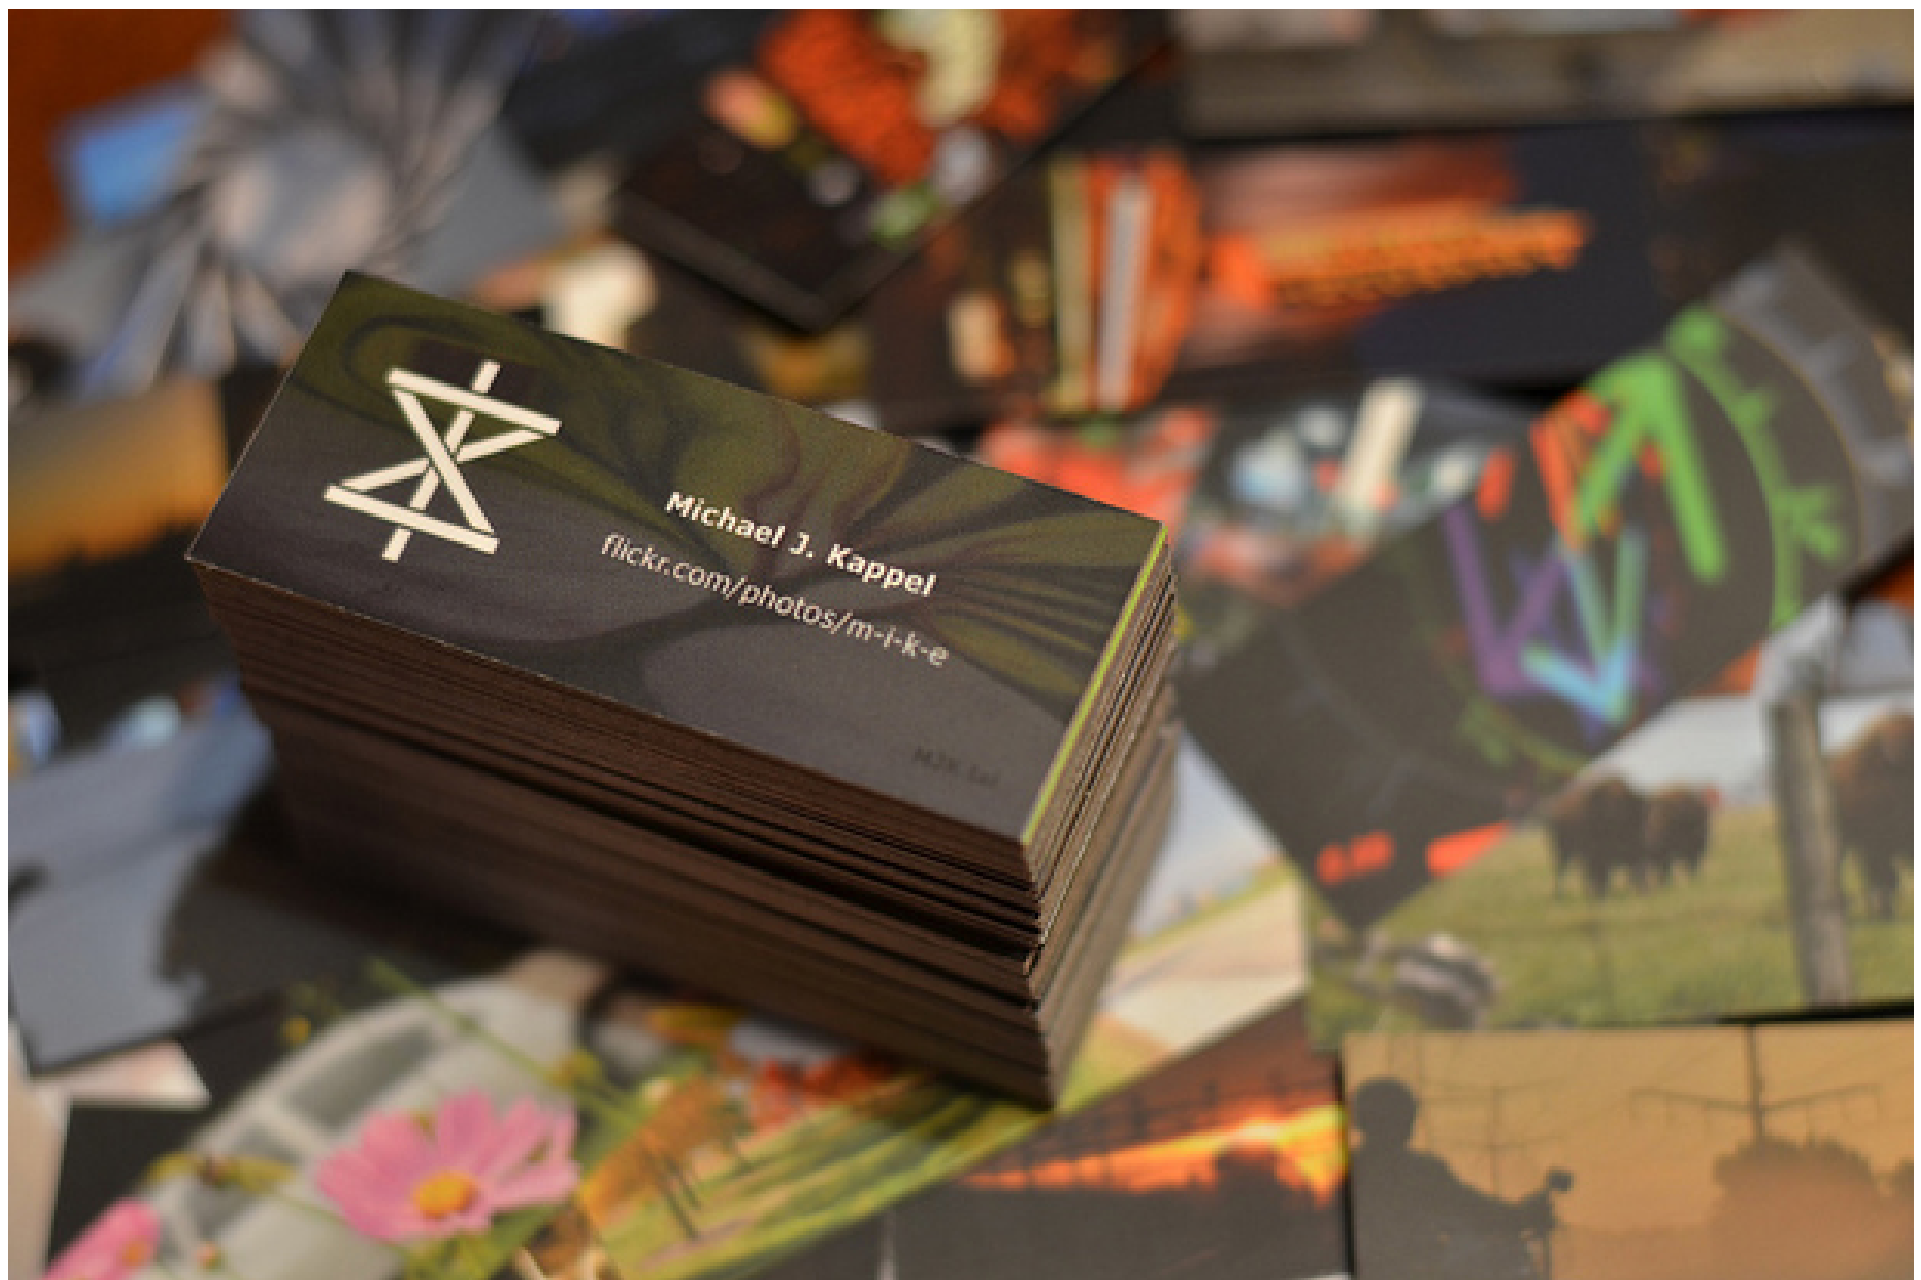

Input

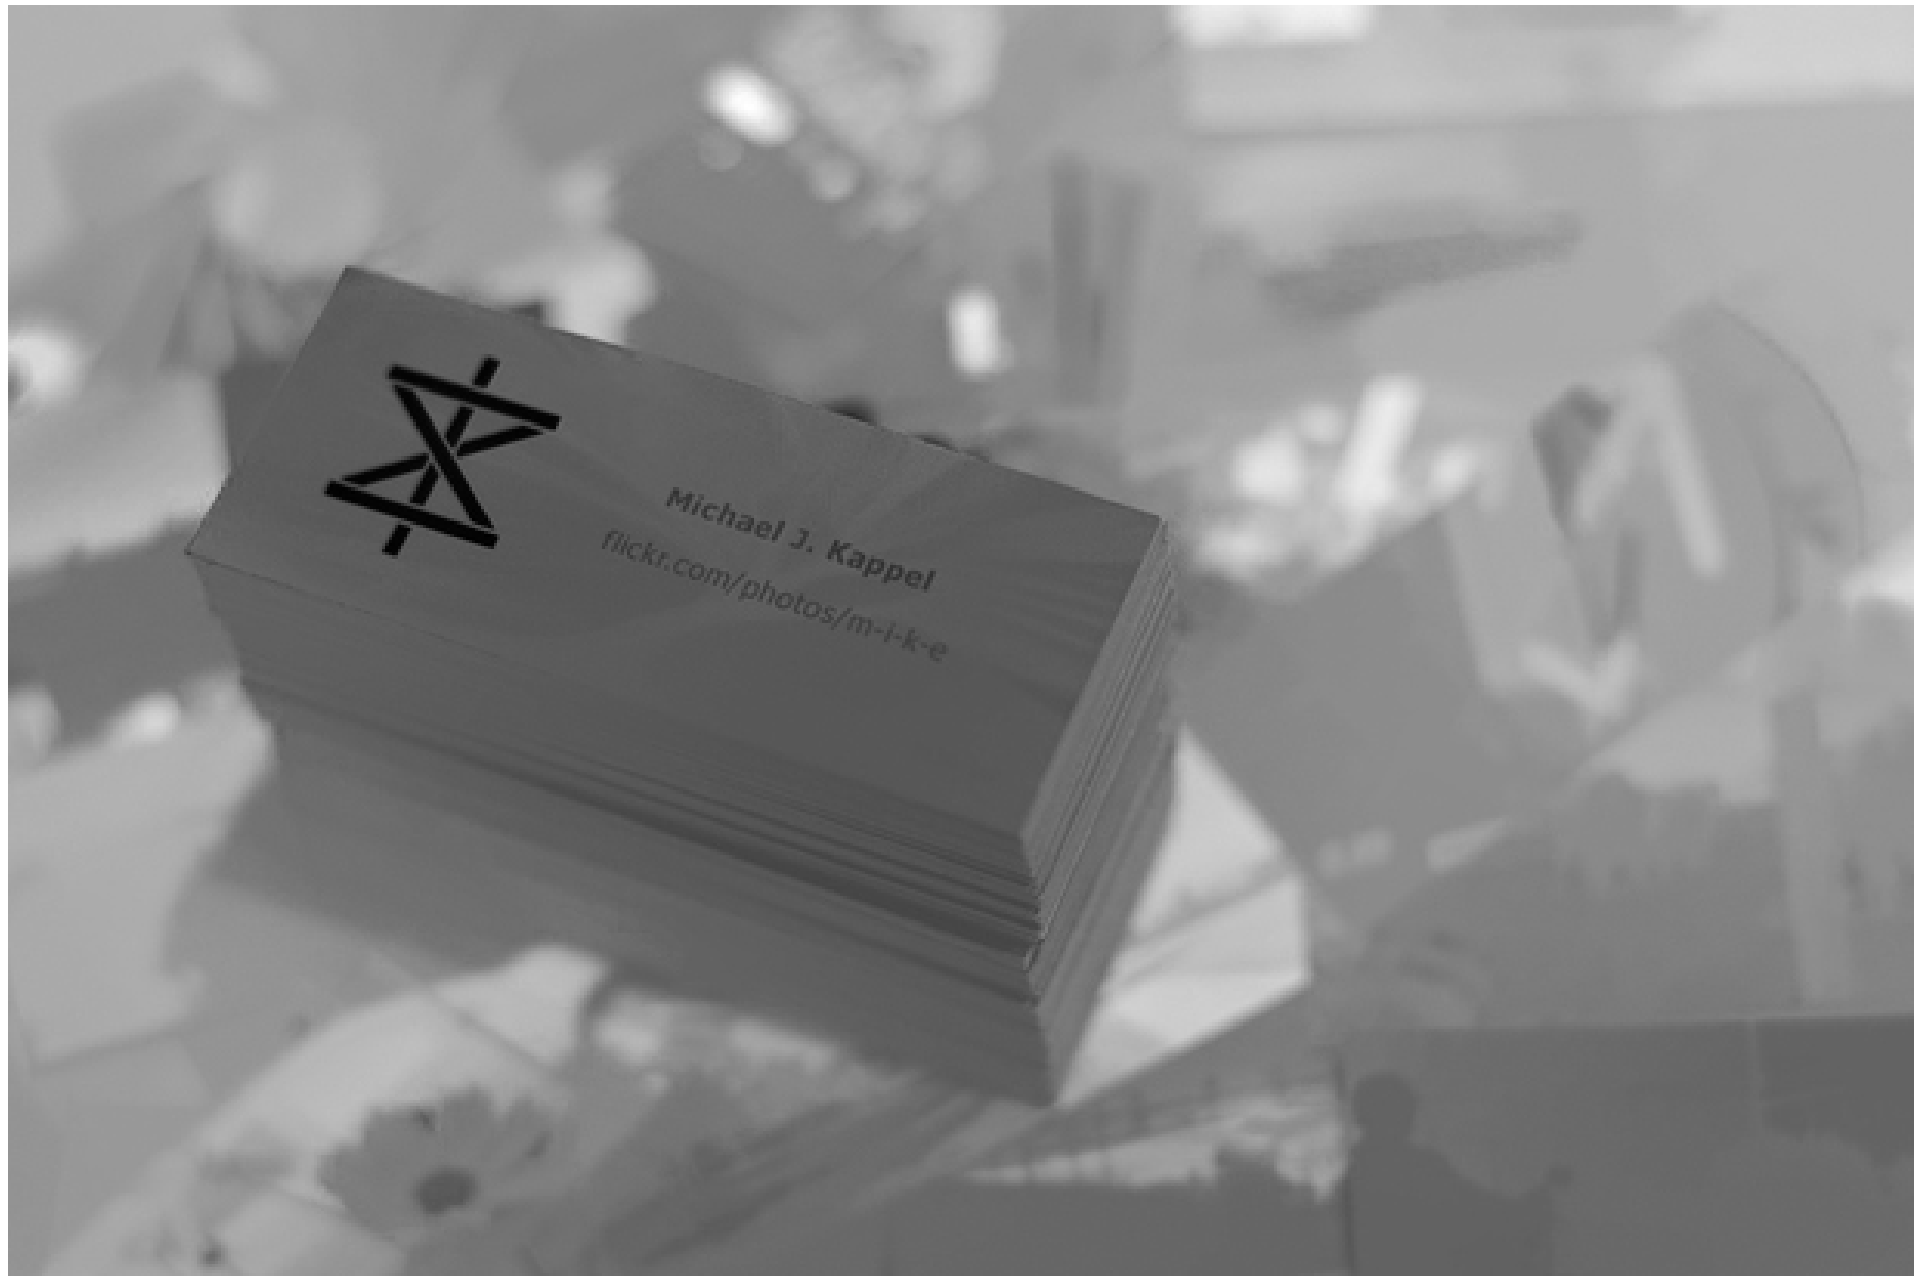

*Zhou et al.*[3]

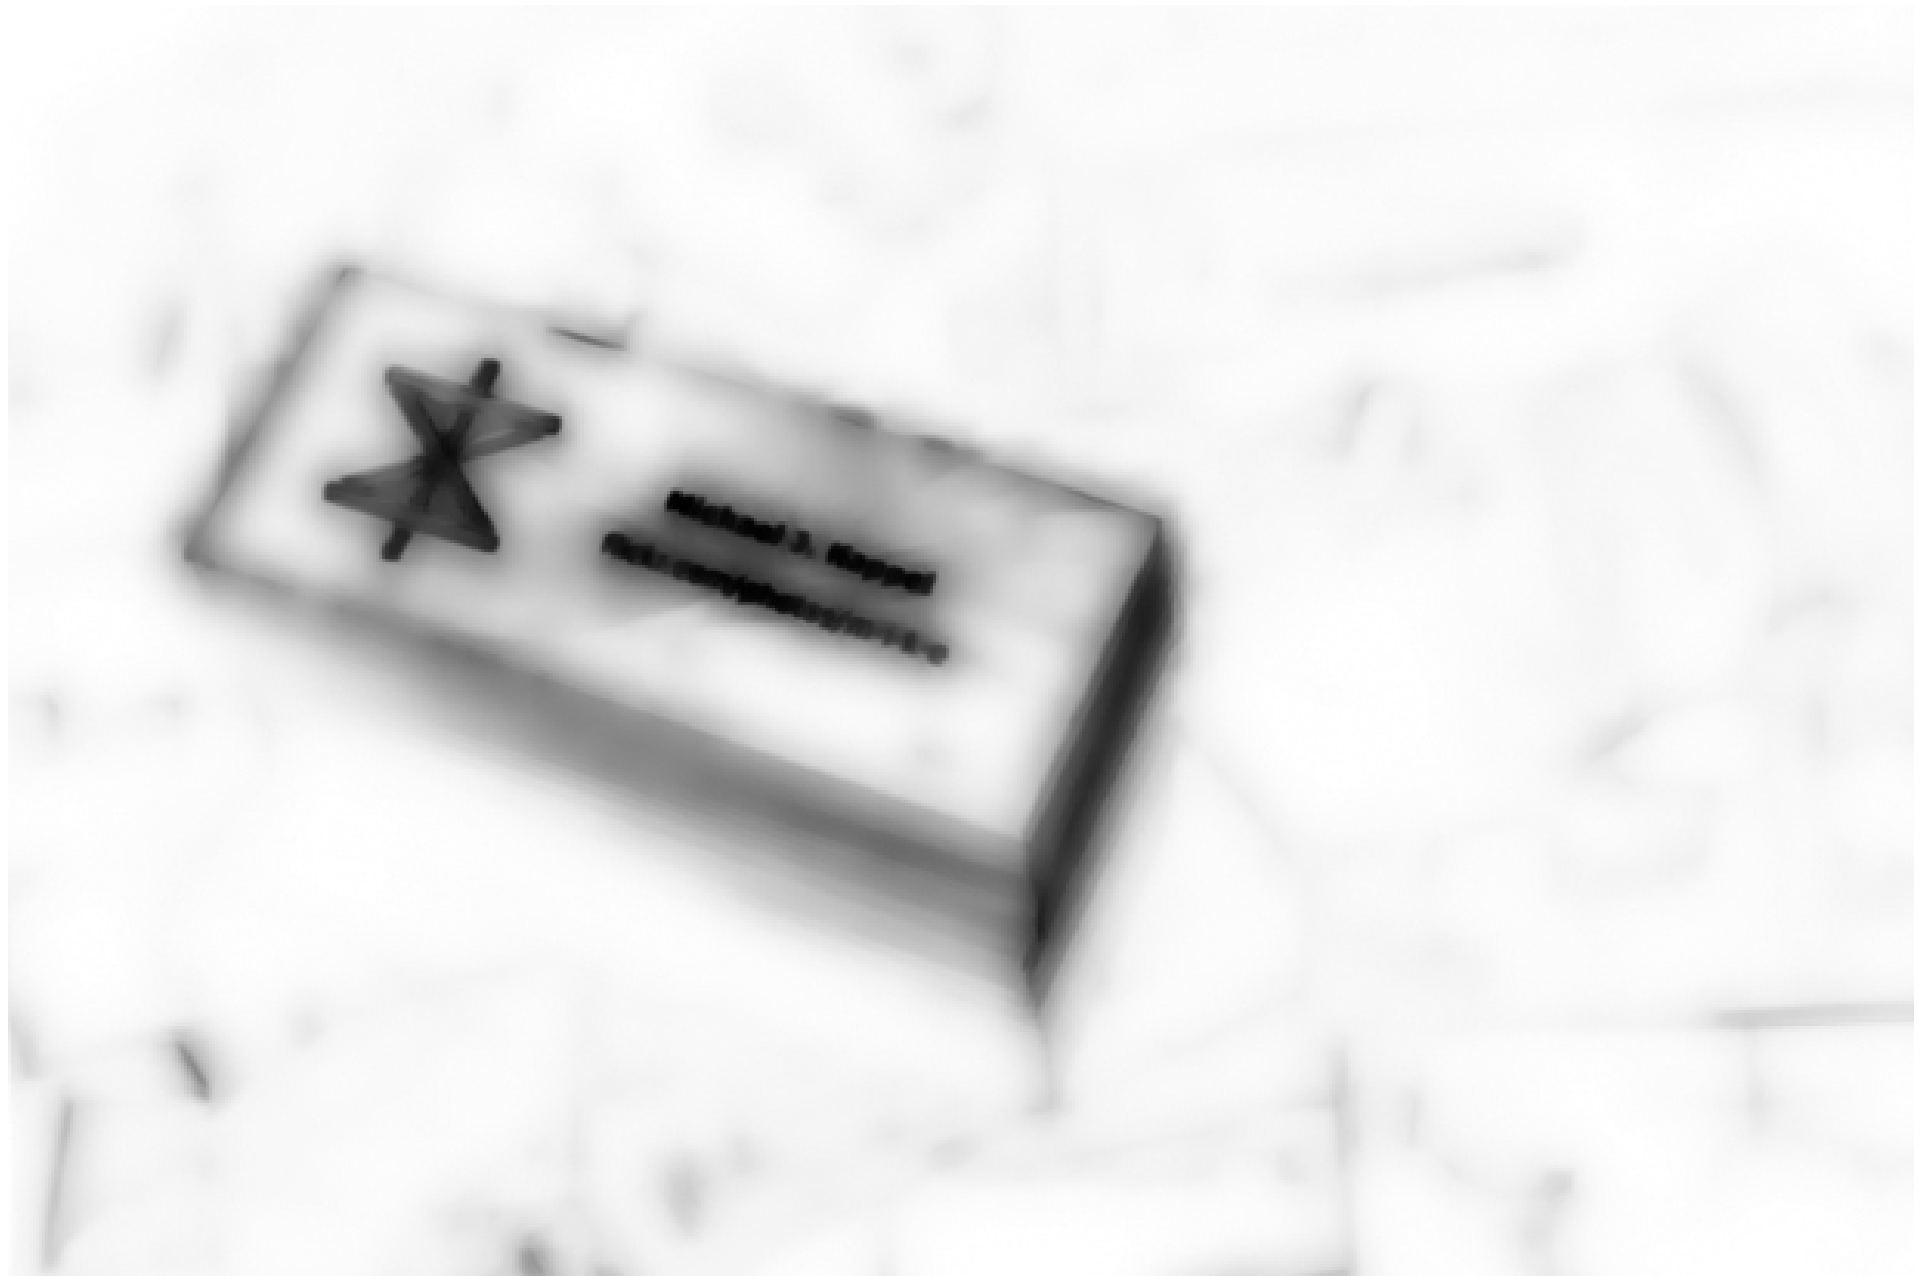

Shi *et al.* [4]

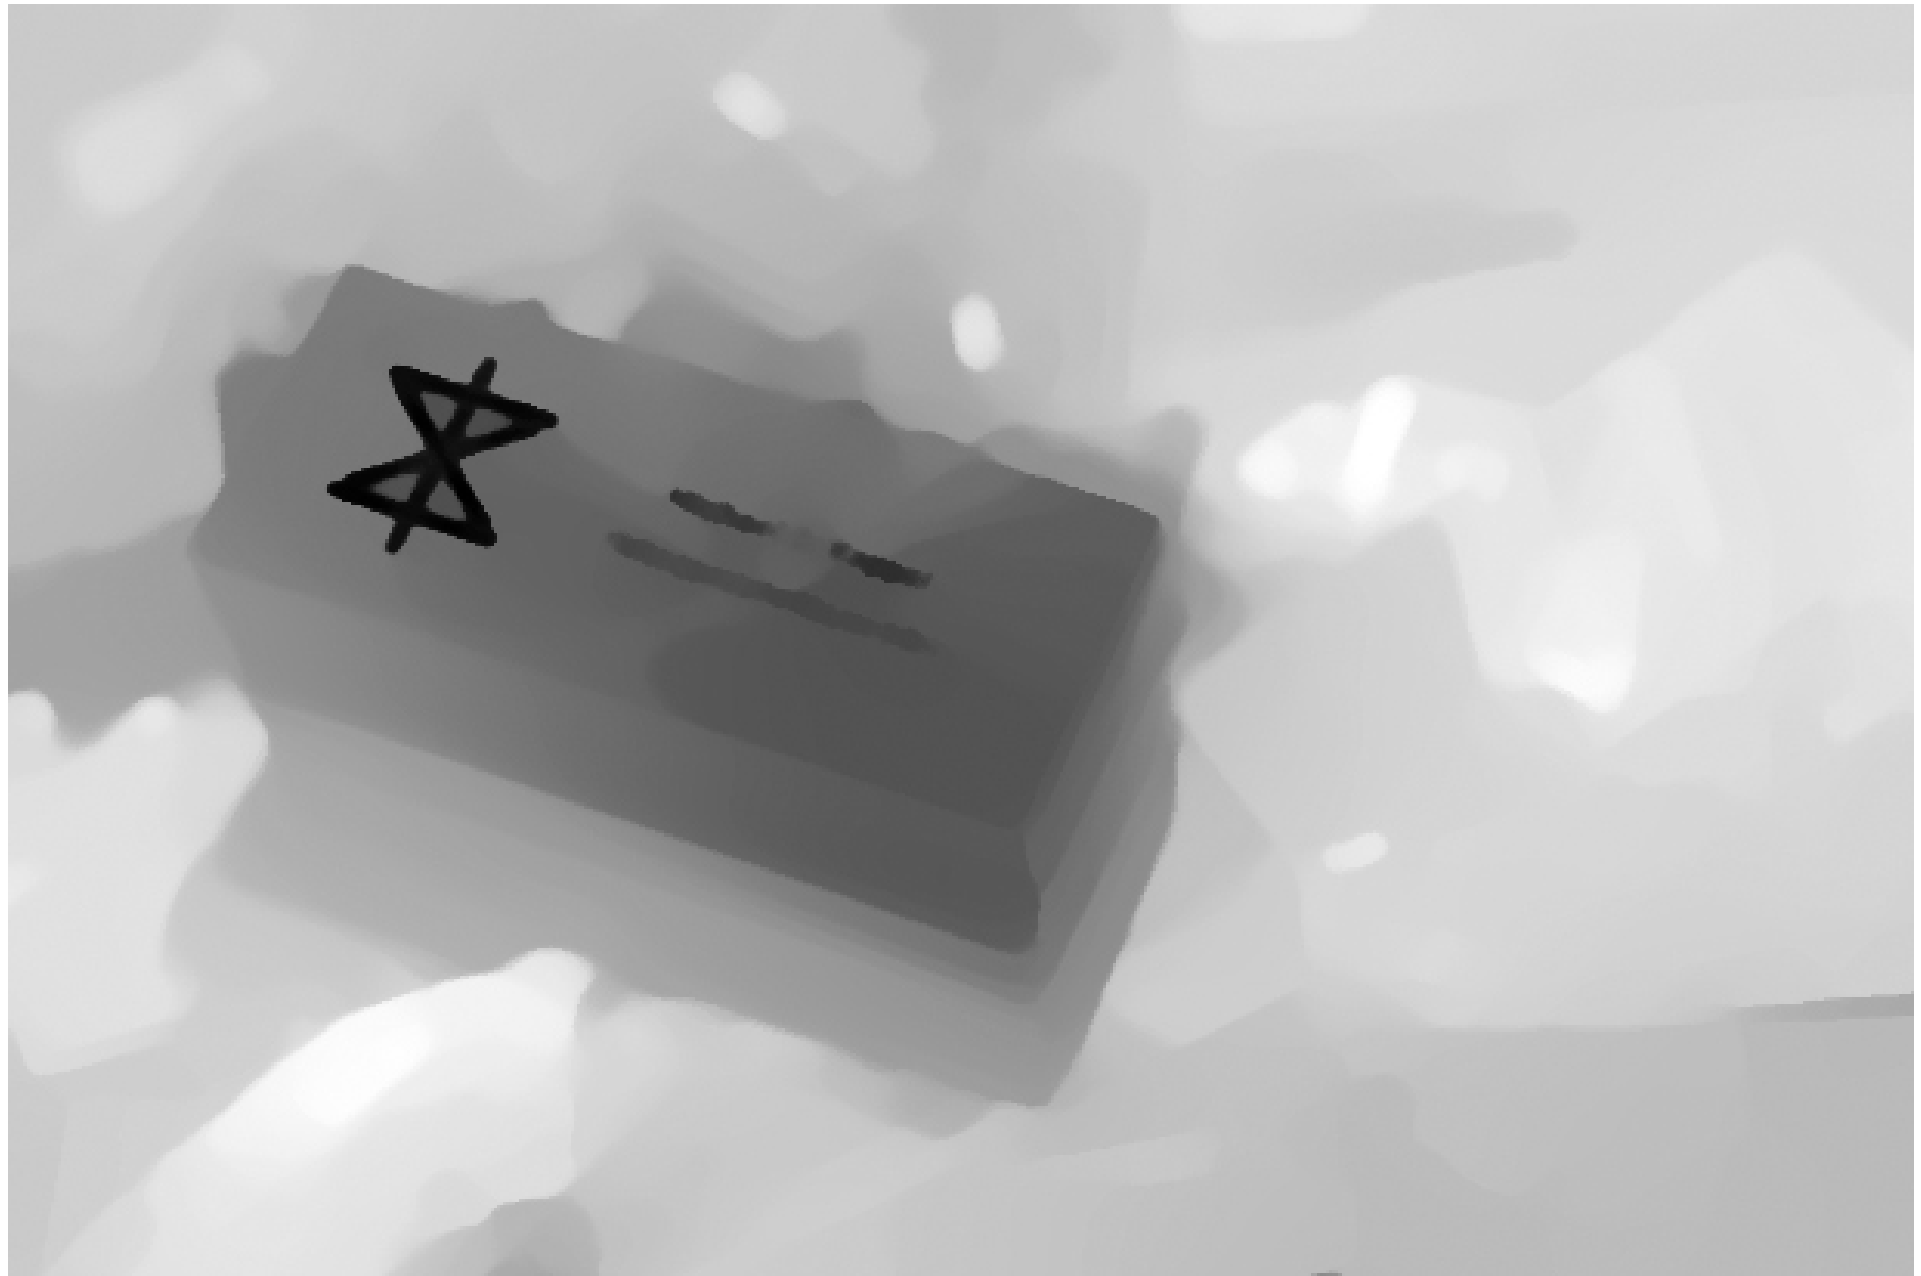

Park *et al.* [5]

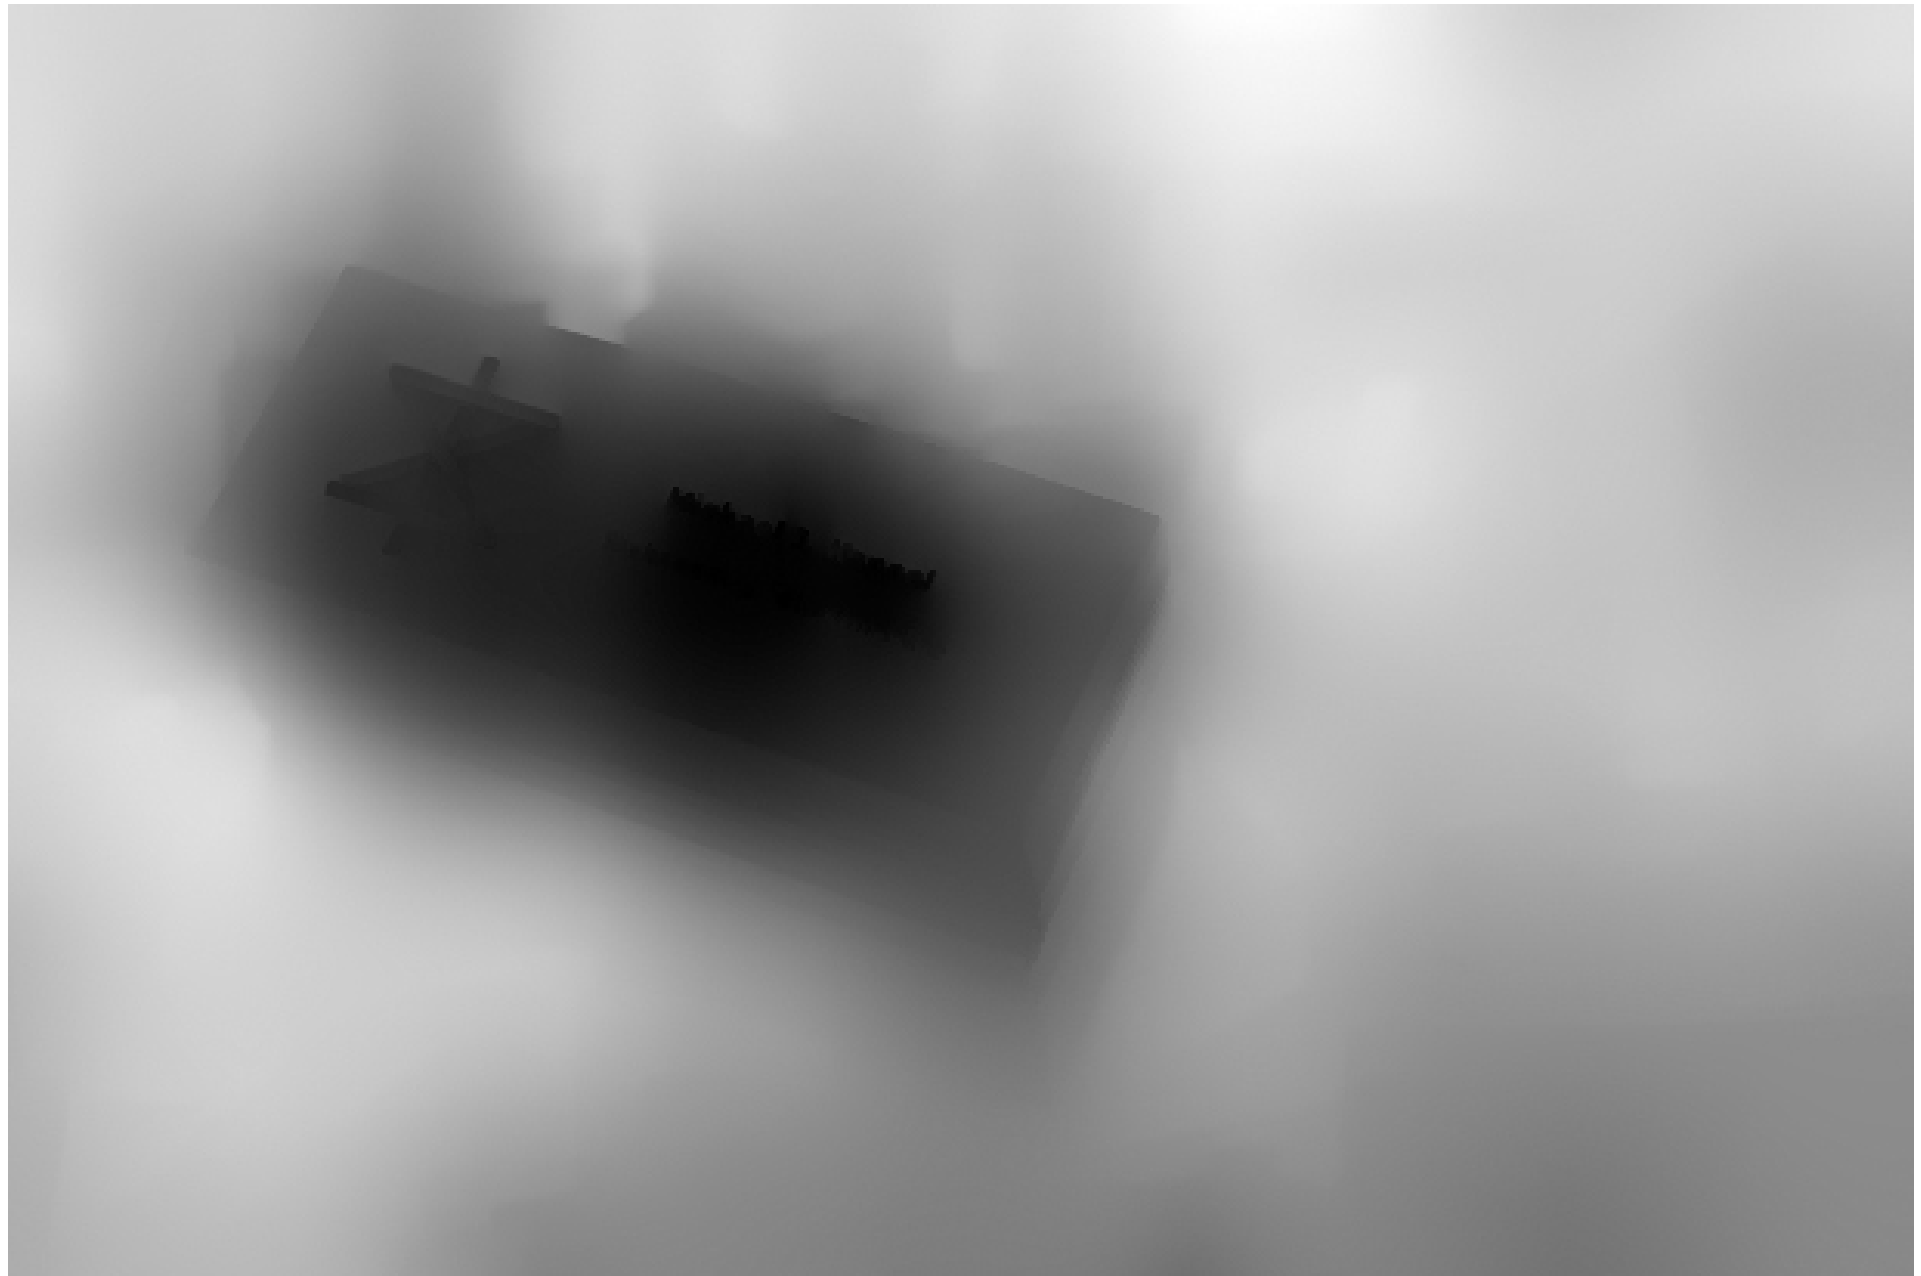

Karaali *et al.* [6]

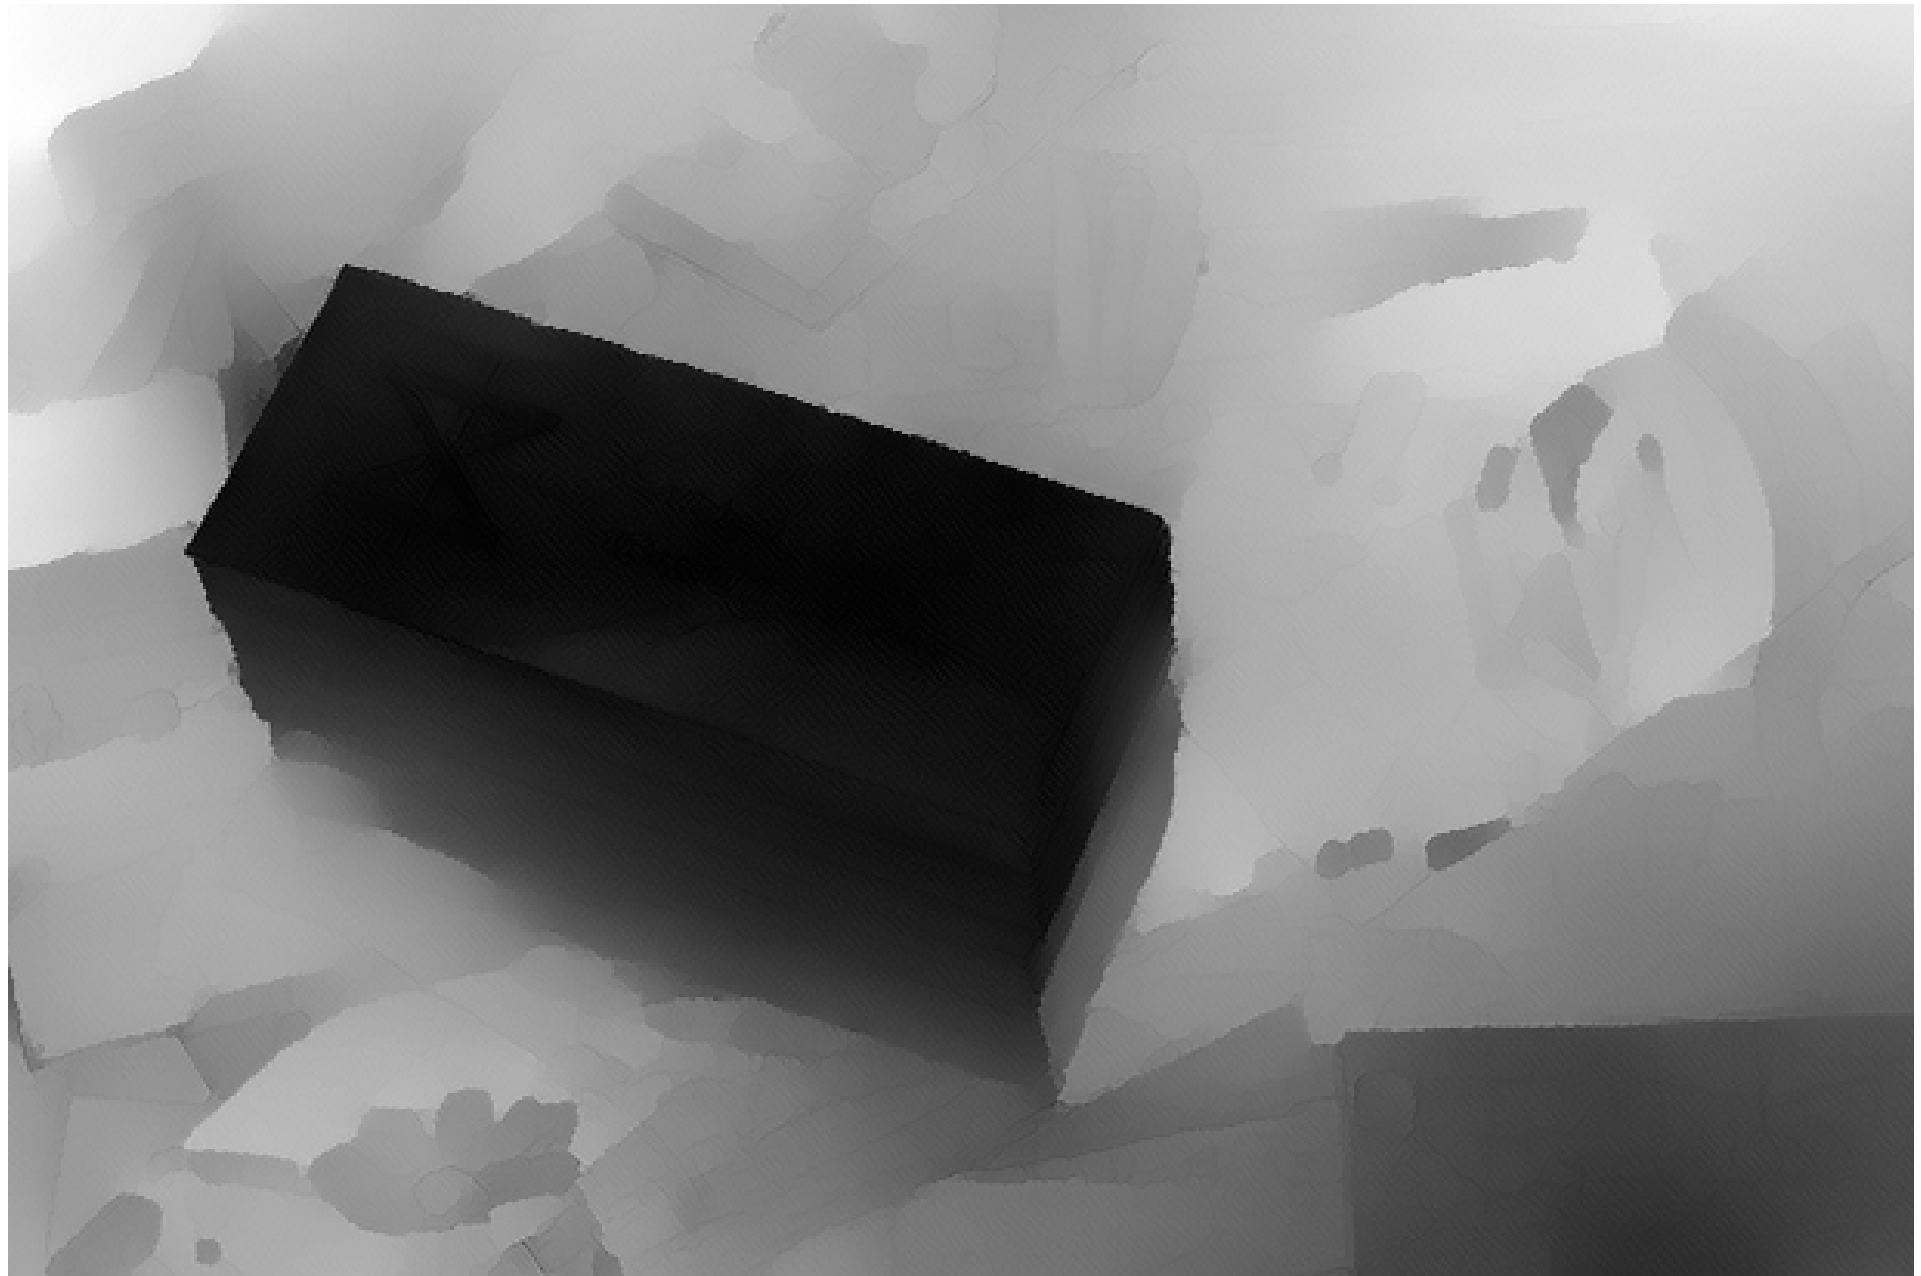

Ours

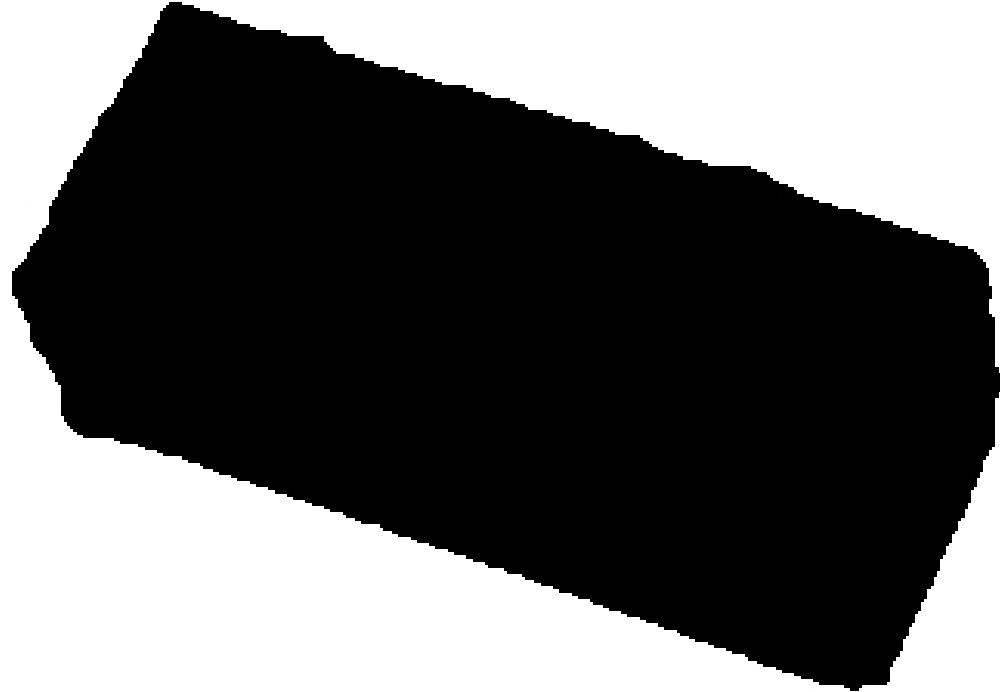

GT (Binary blur map)

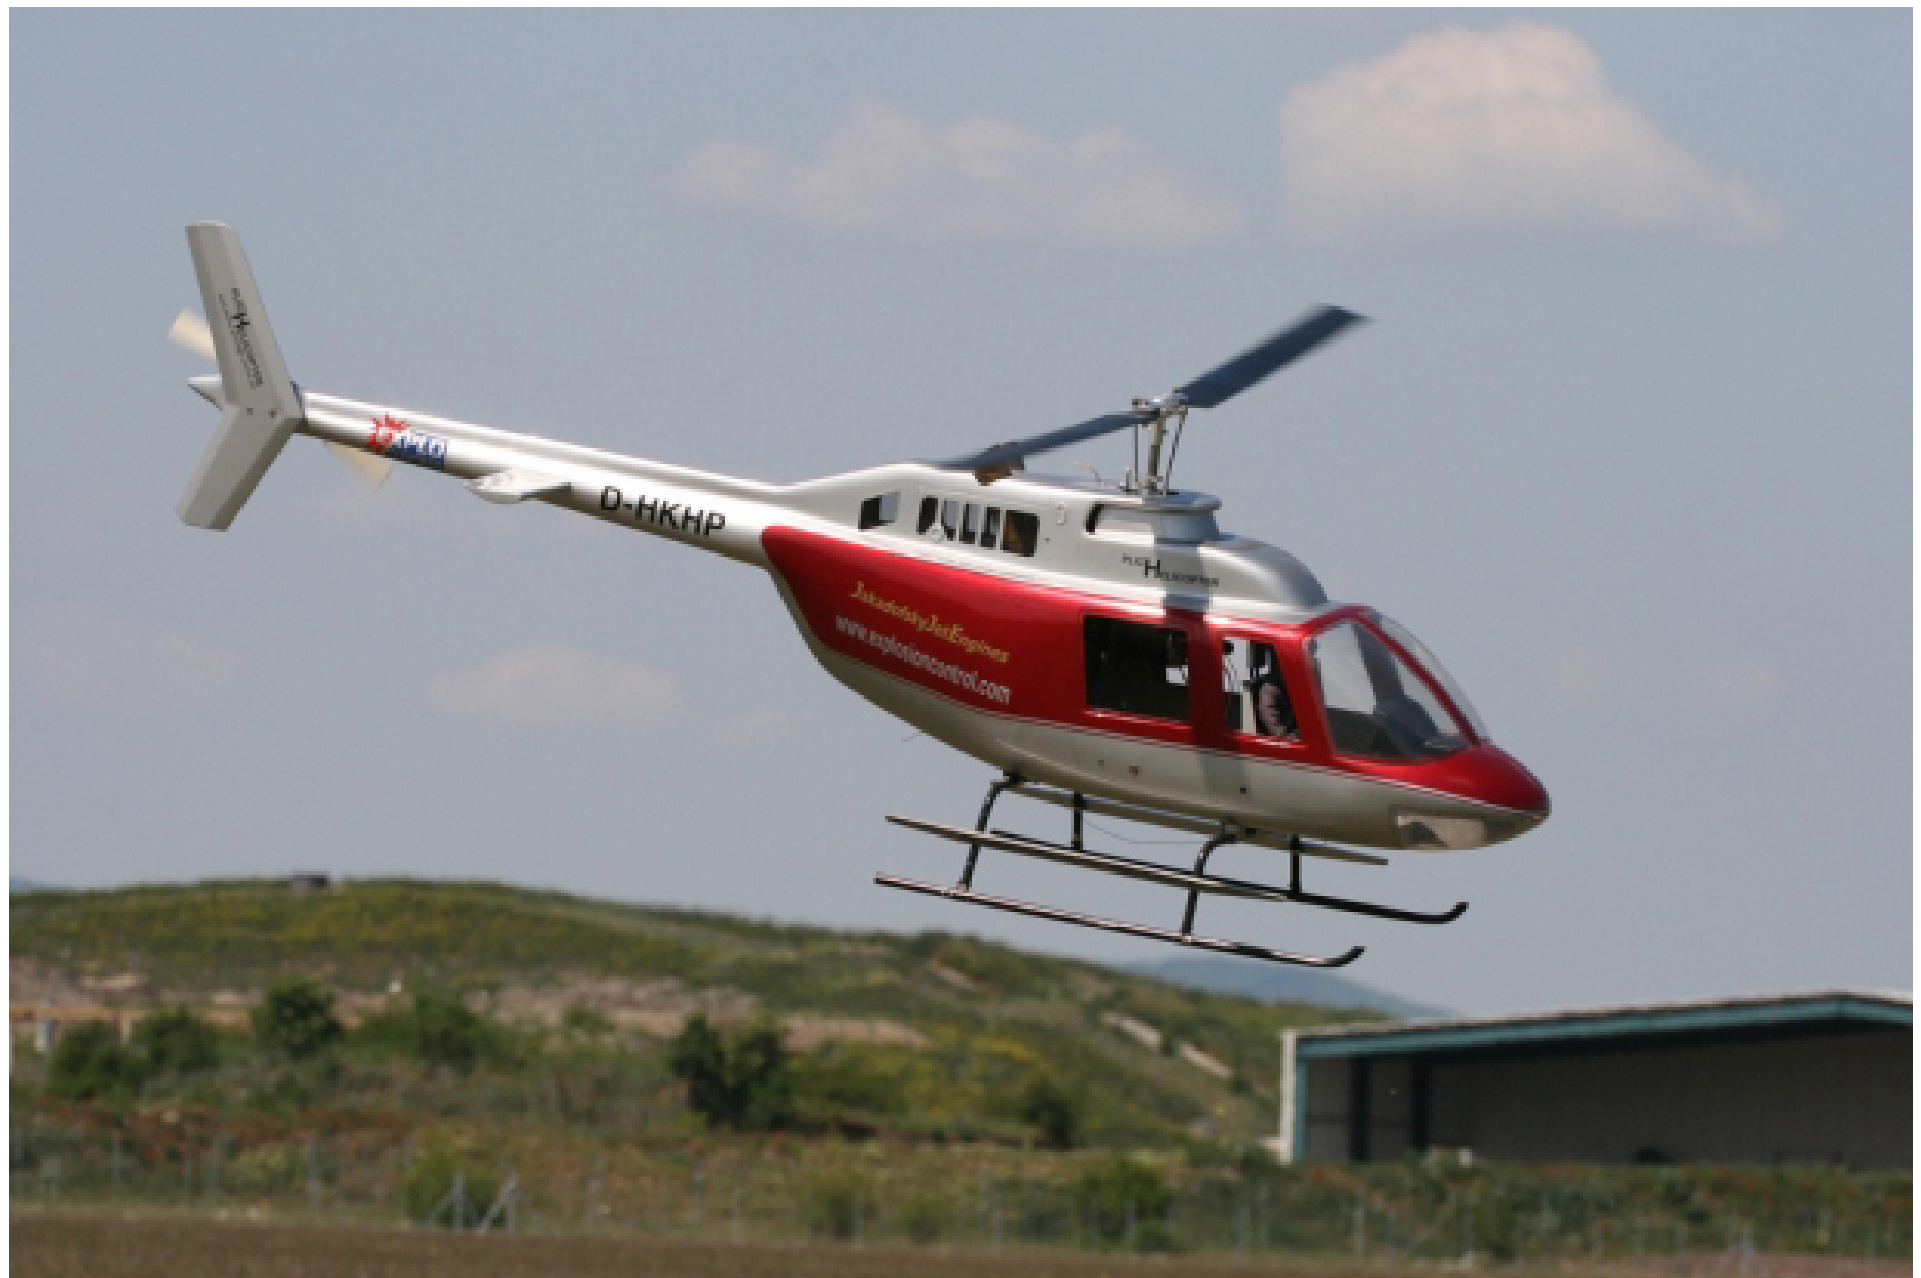

Input

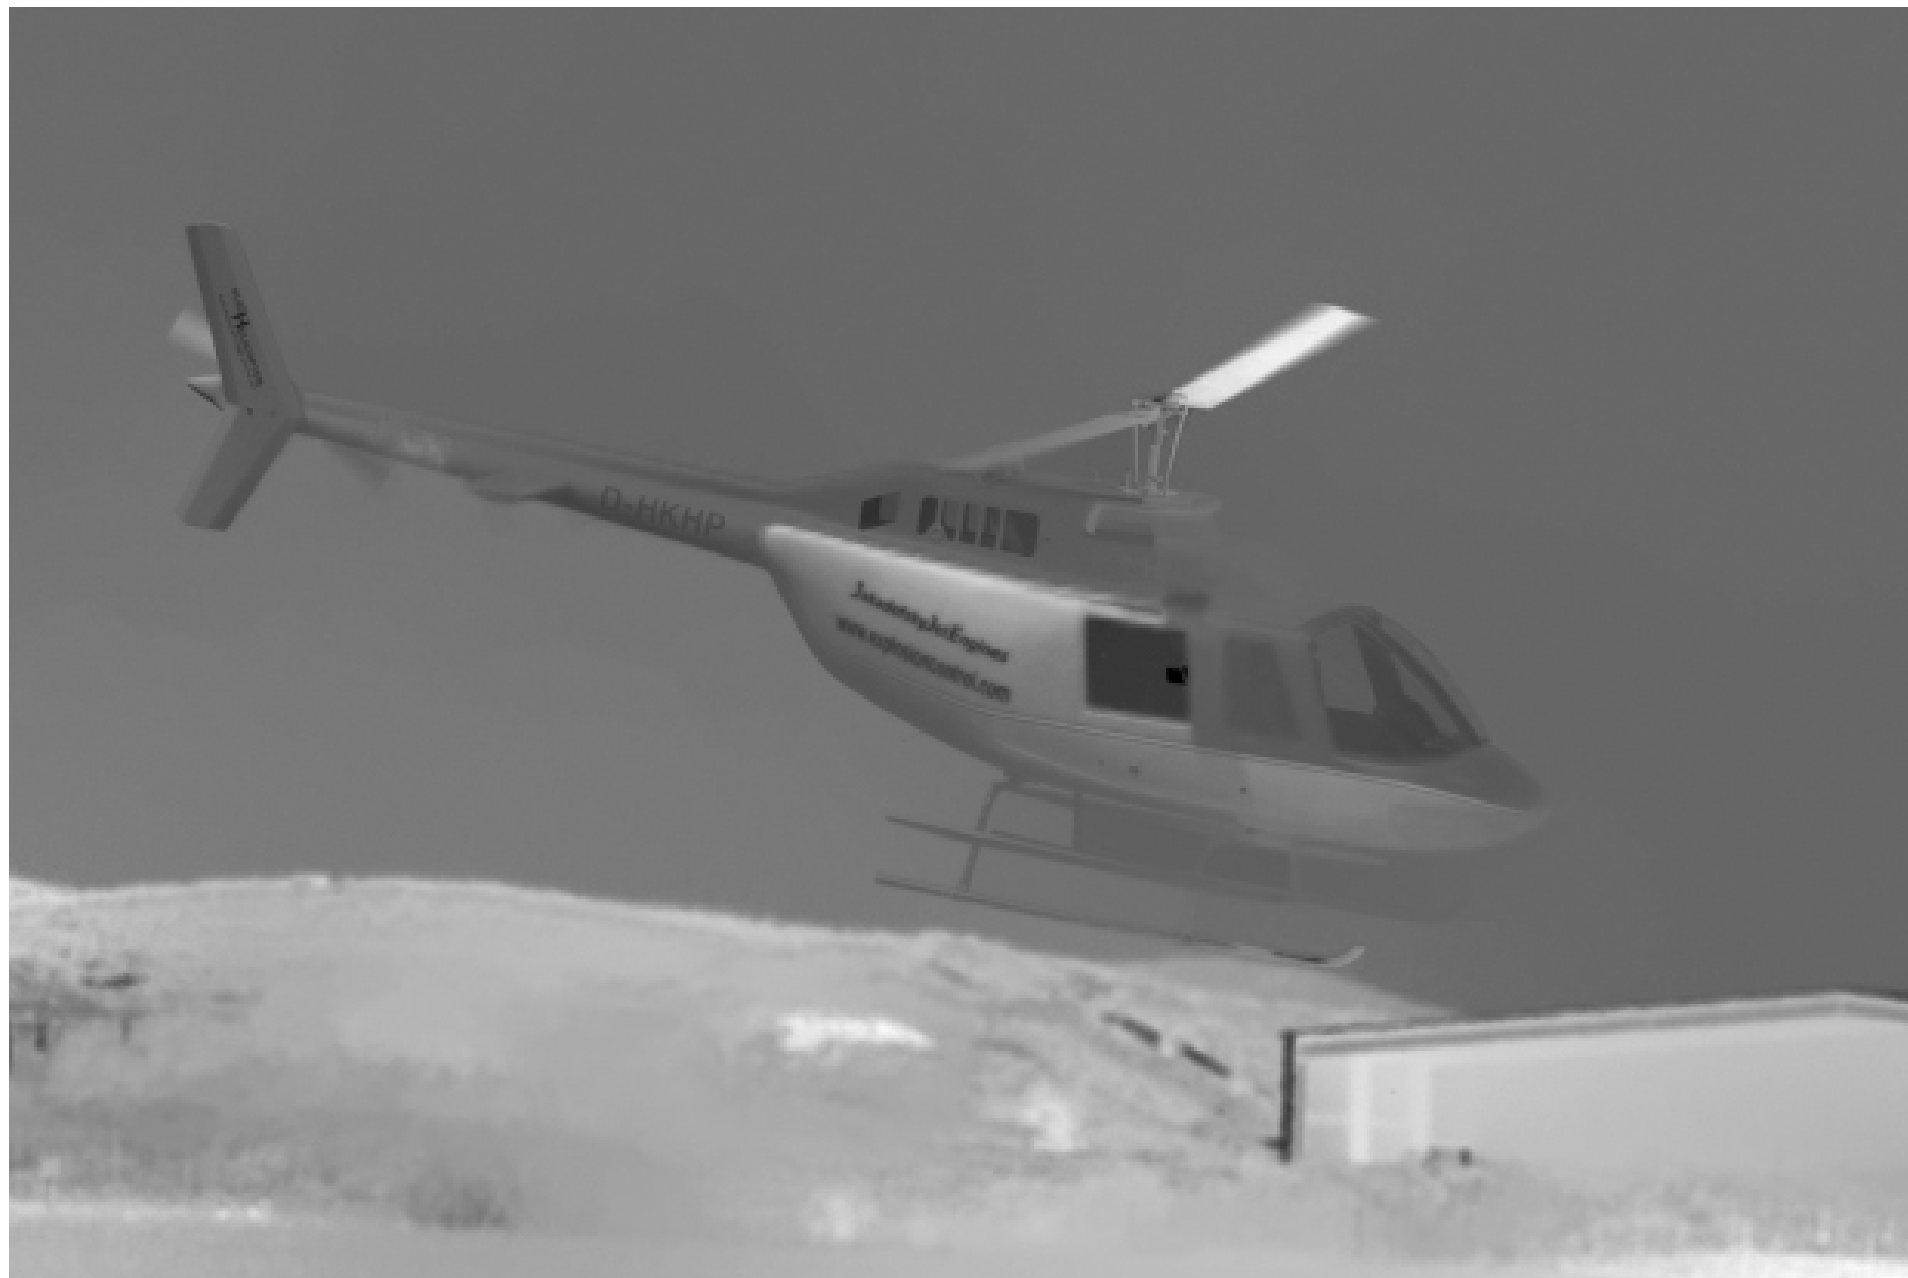

Zhou *et al.*[3]

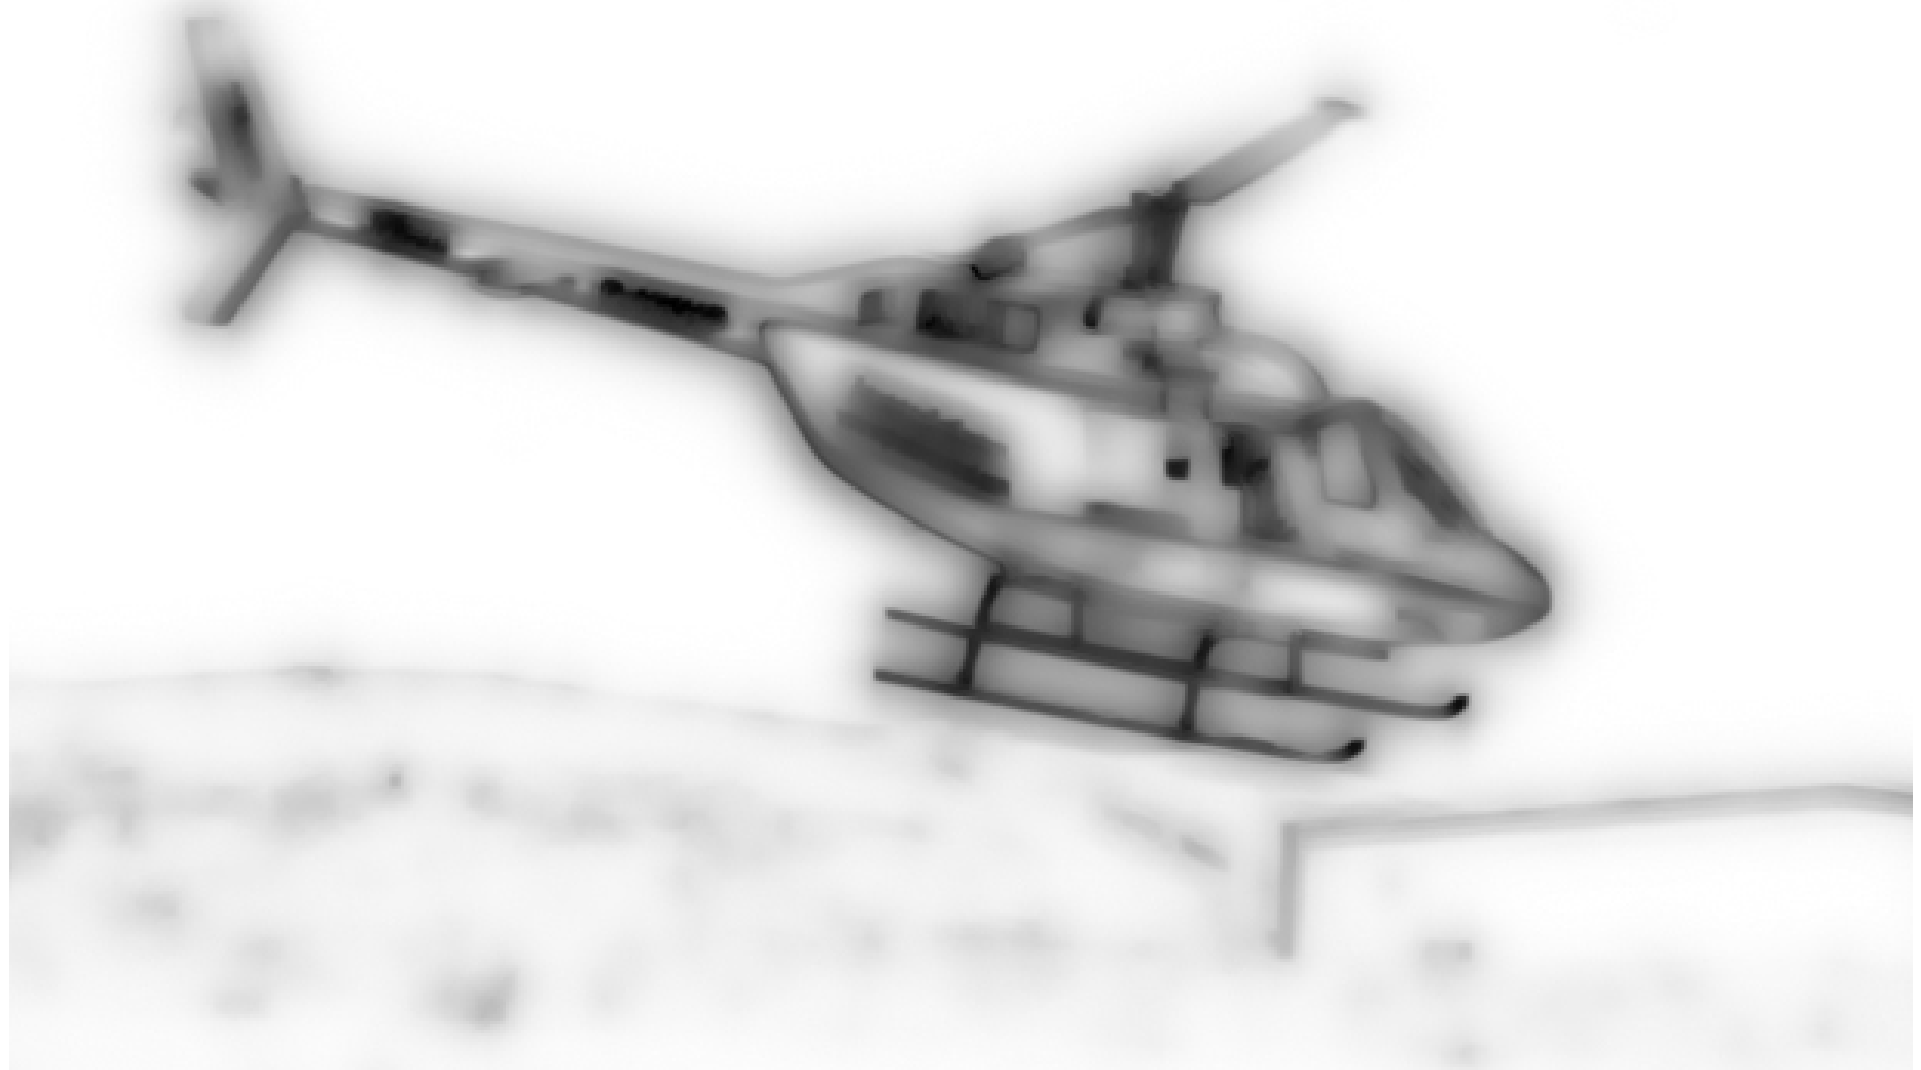

Shi *et al.* [4]

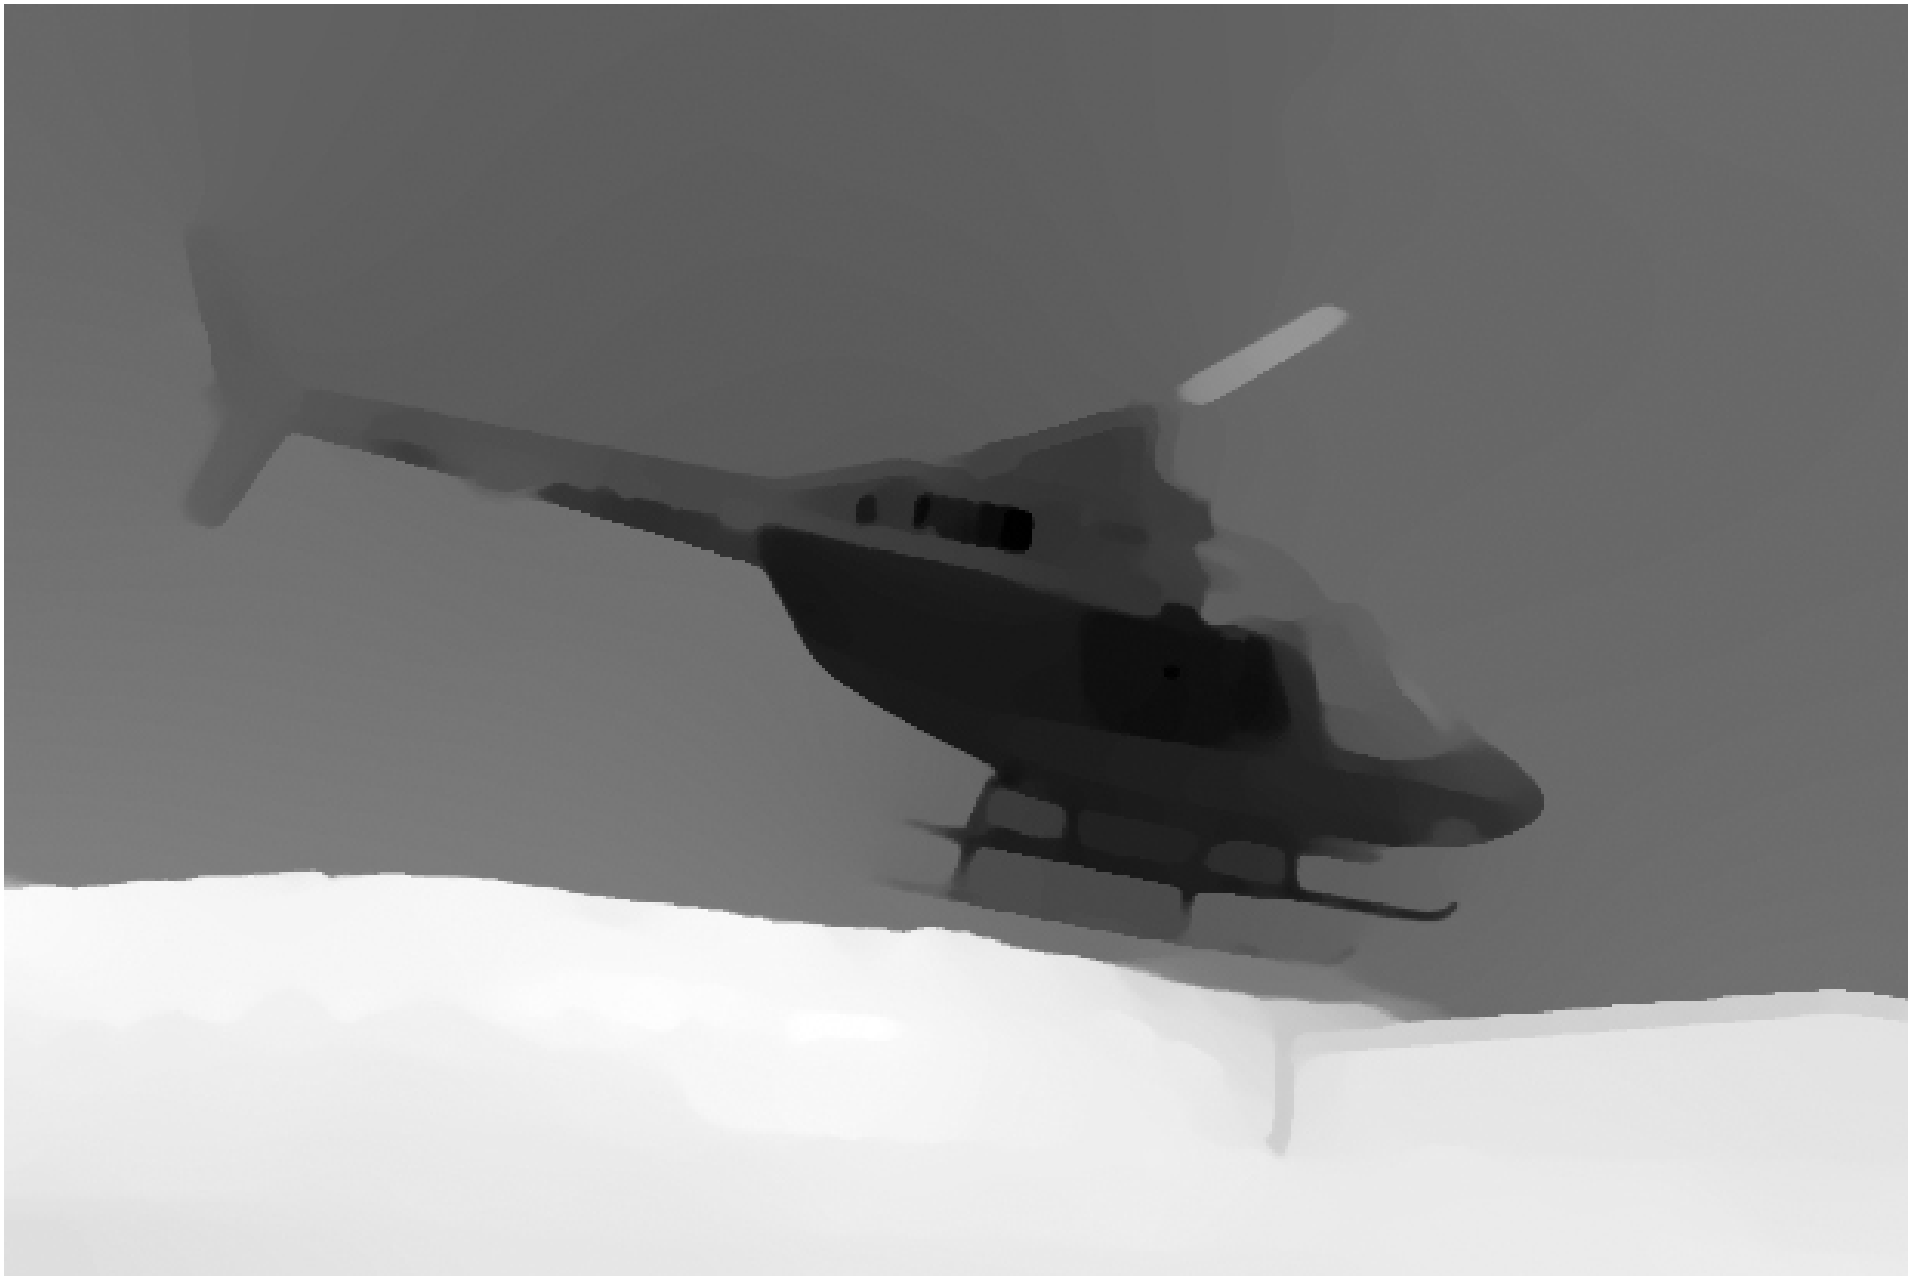

Park *et al.* [5]

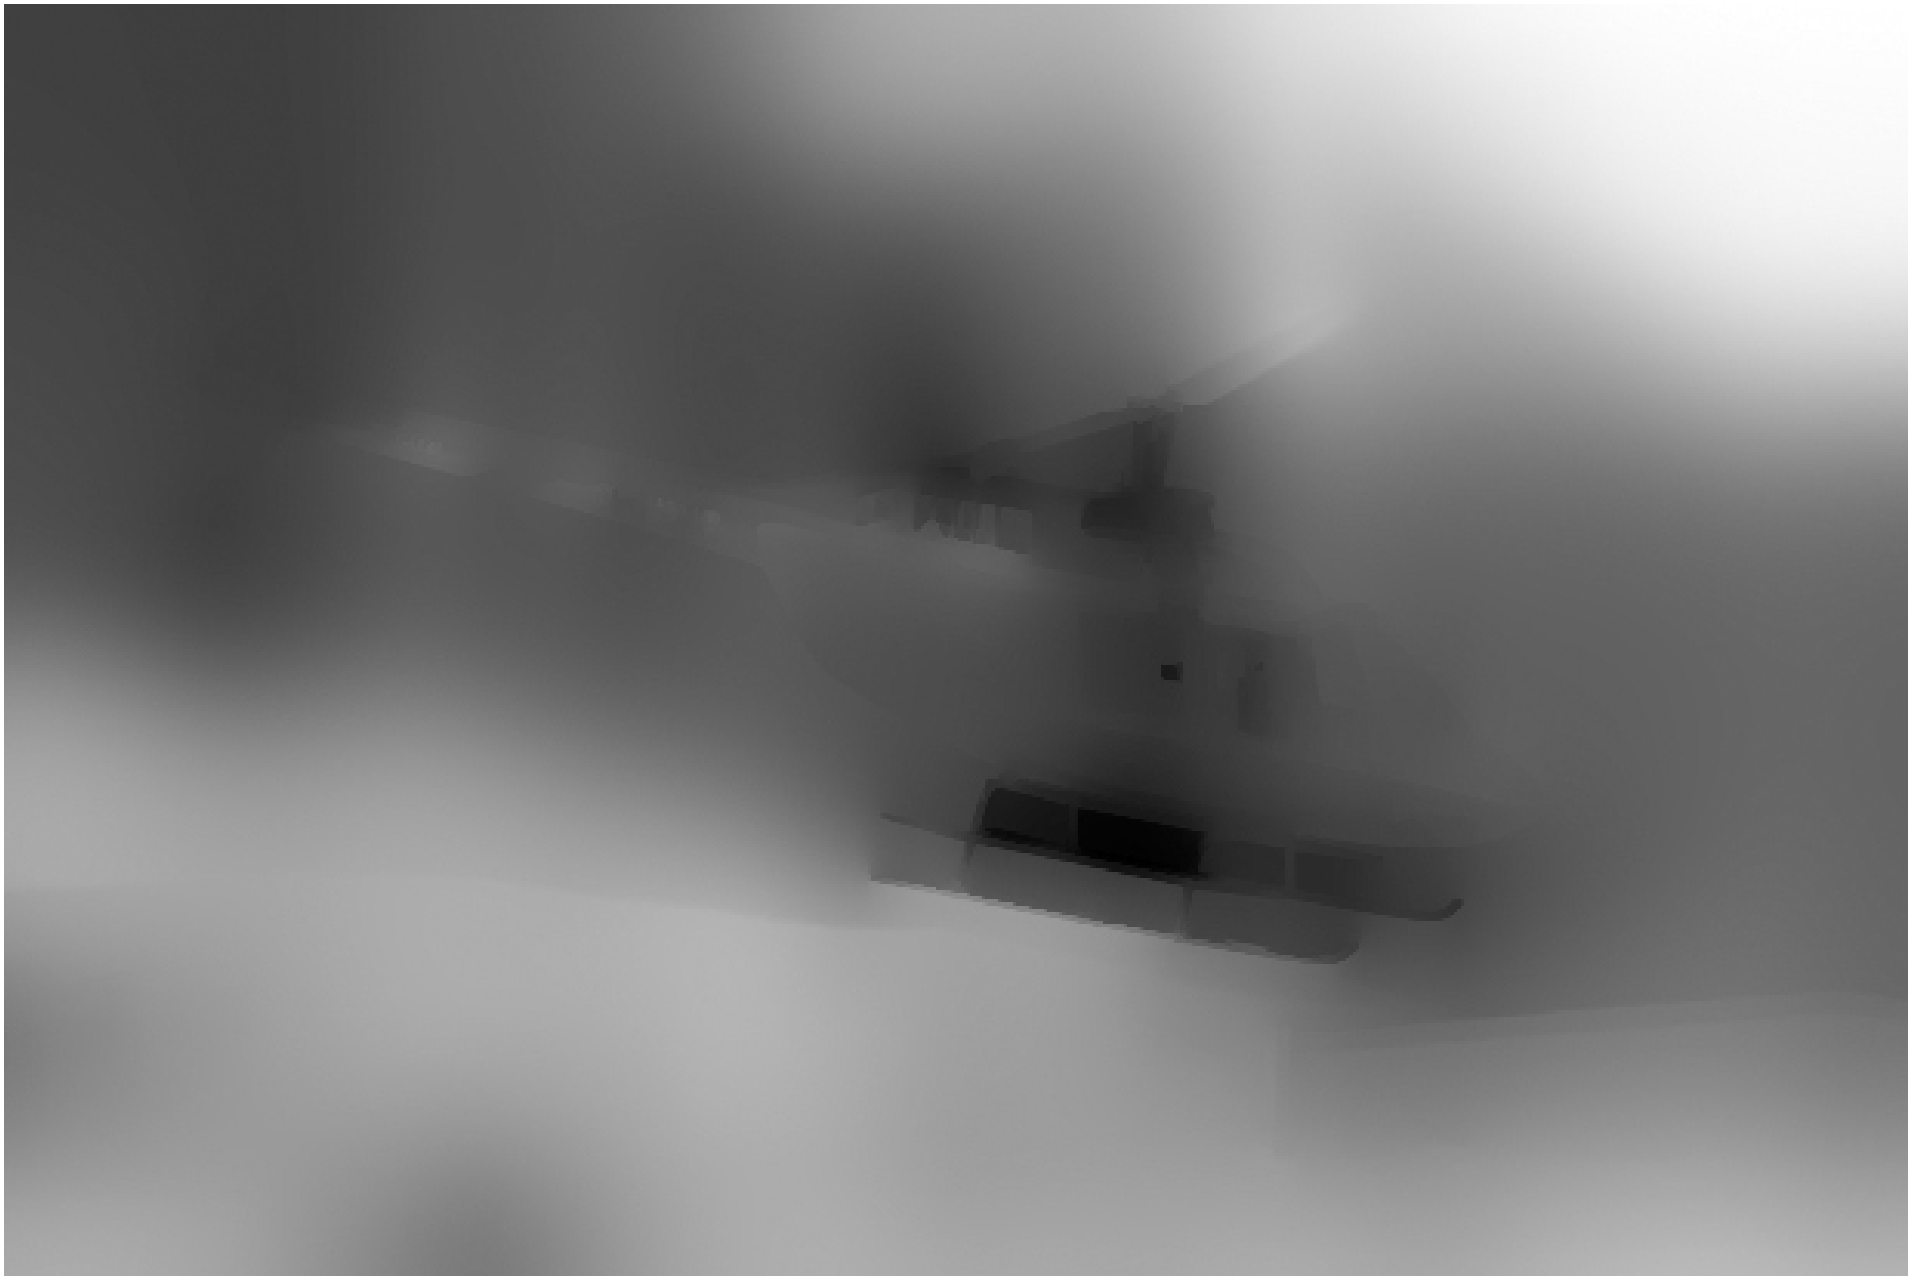

Karaali *et al.* [6]

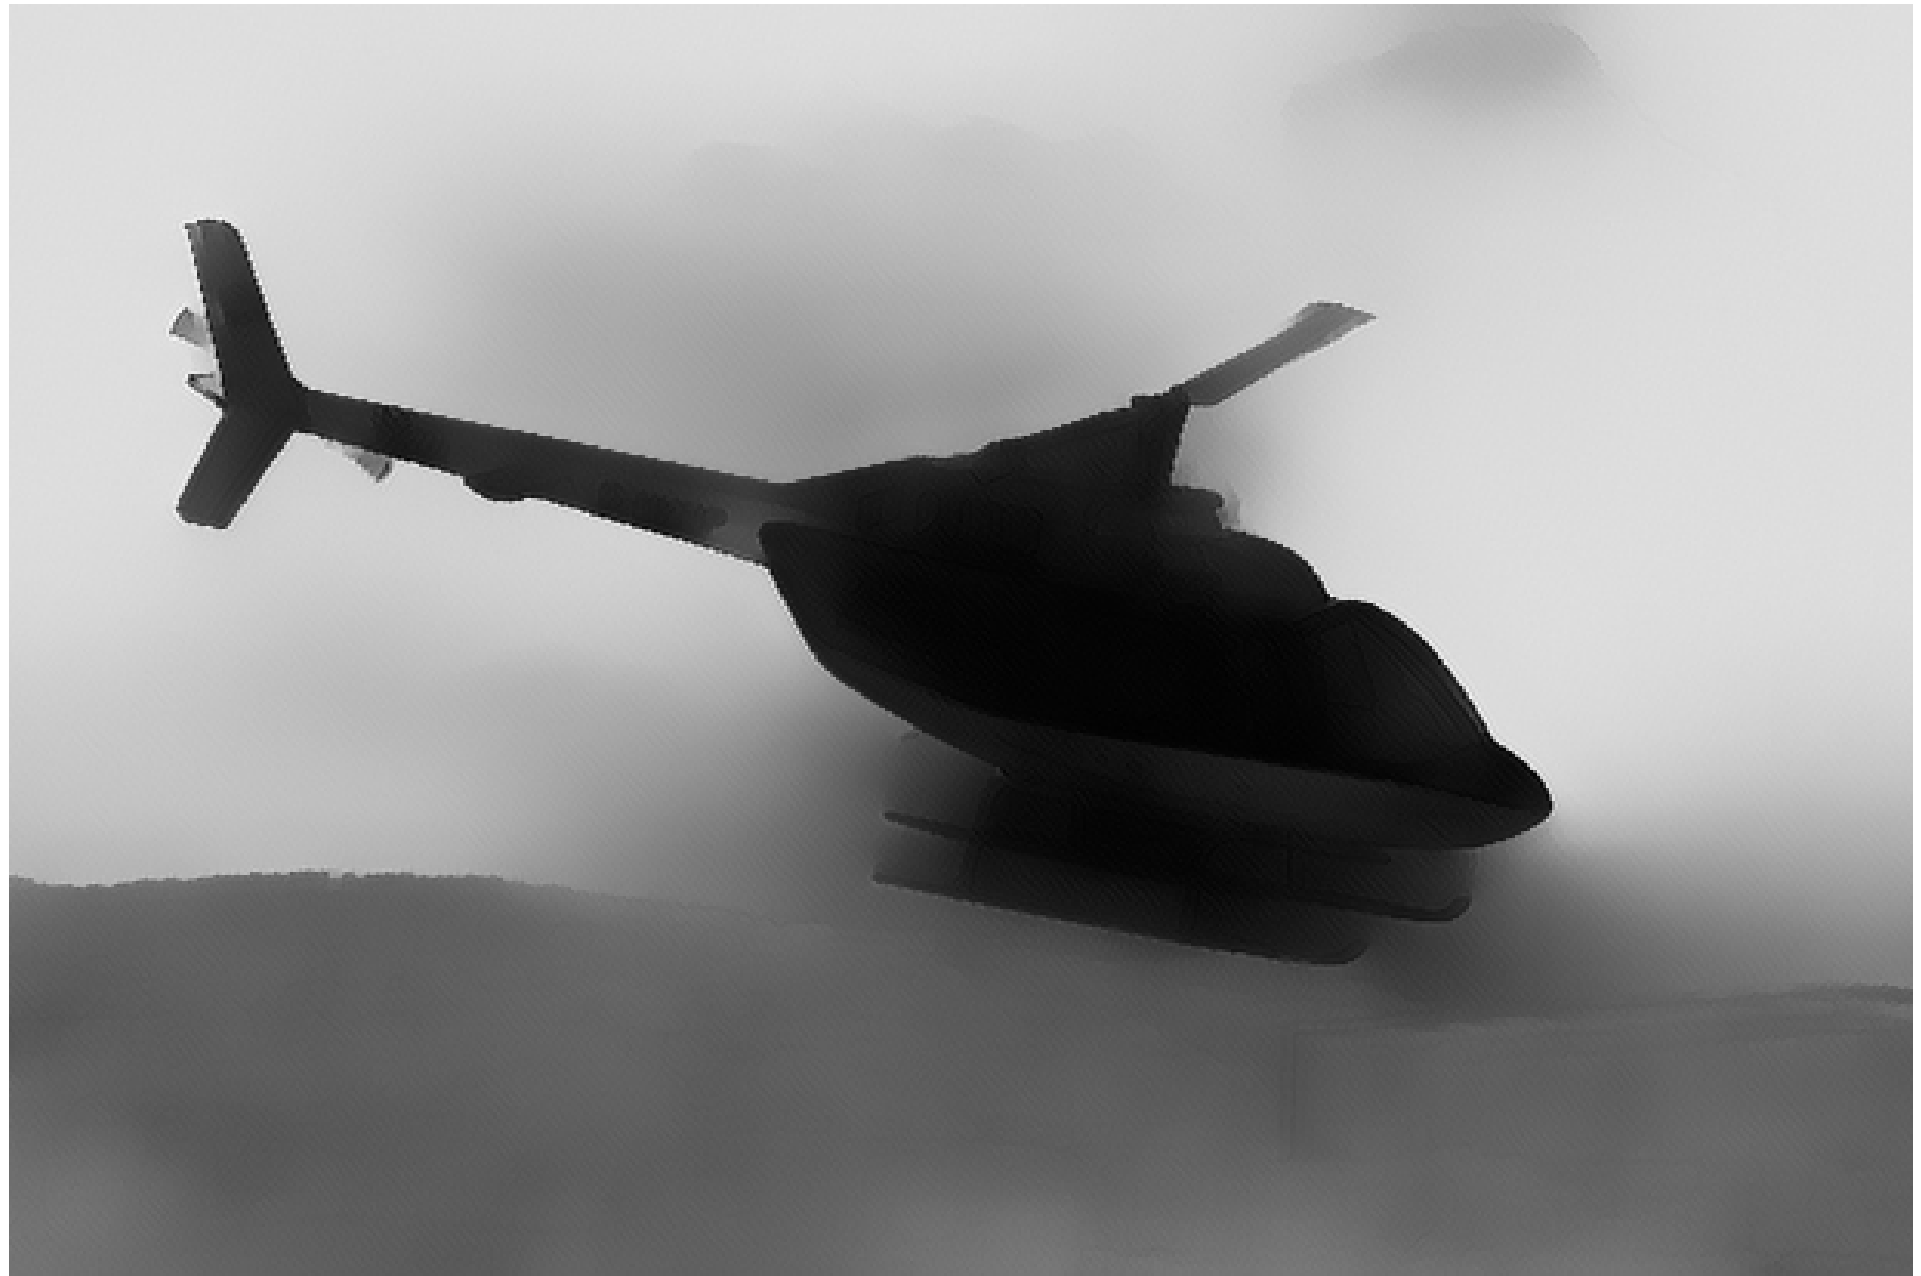

Ours

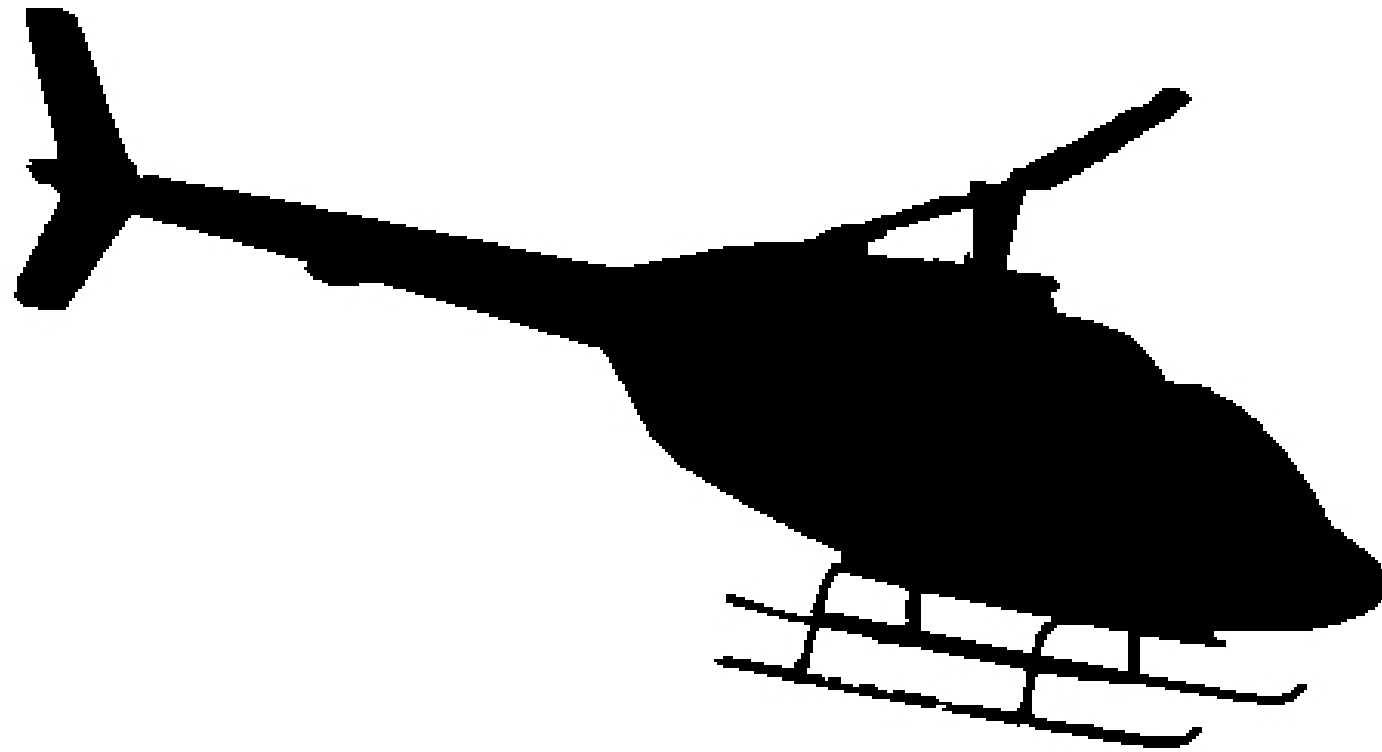

GT (Binary blur map)

Figure 8: Defocus blur magnification using defocus map estimated by  $DMENet_{BDCS}$ .

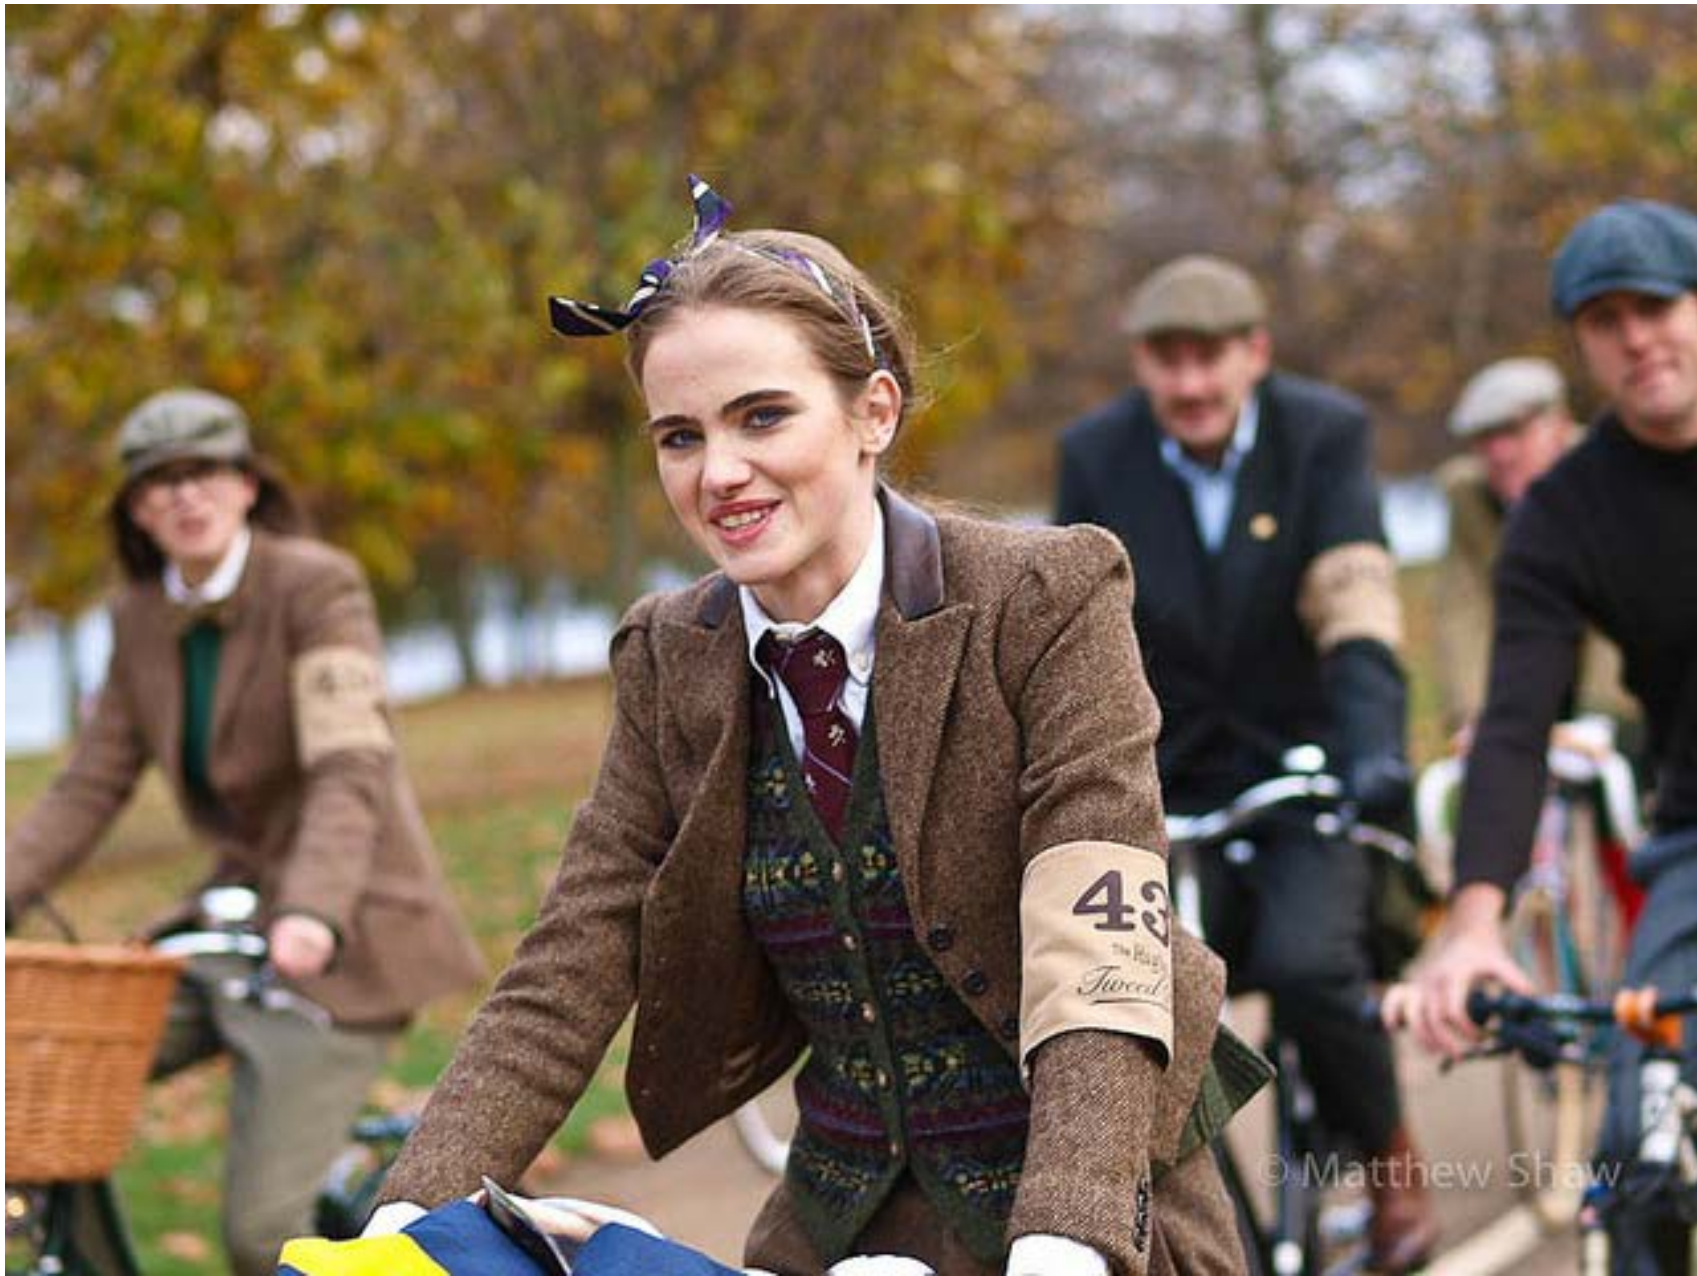

Input

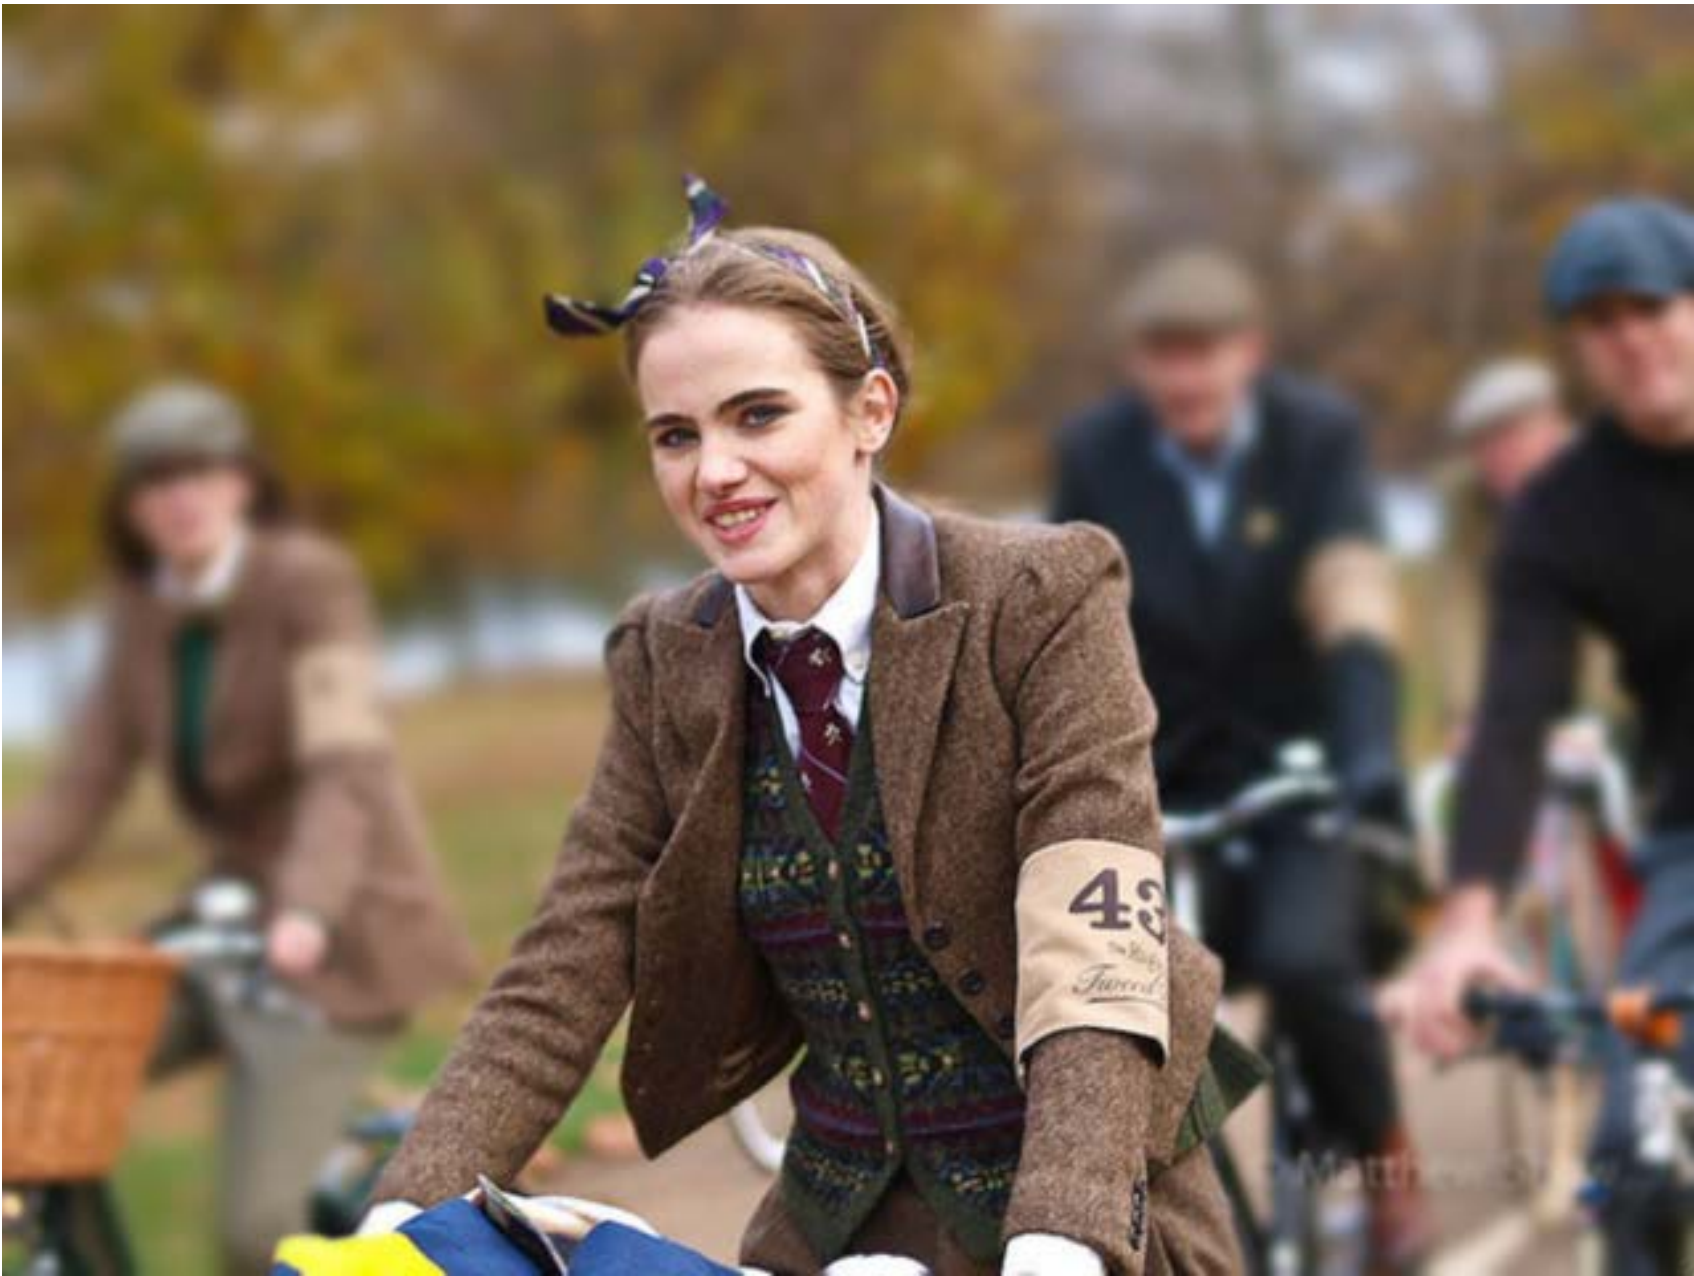

Blur magnification result

Figure 9: Deblurring using defocus map  
estimated by  $DMENet_{BDCS}$ .

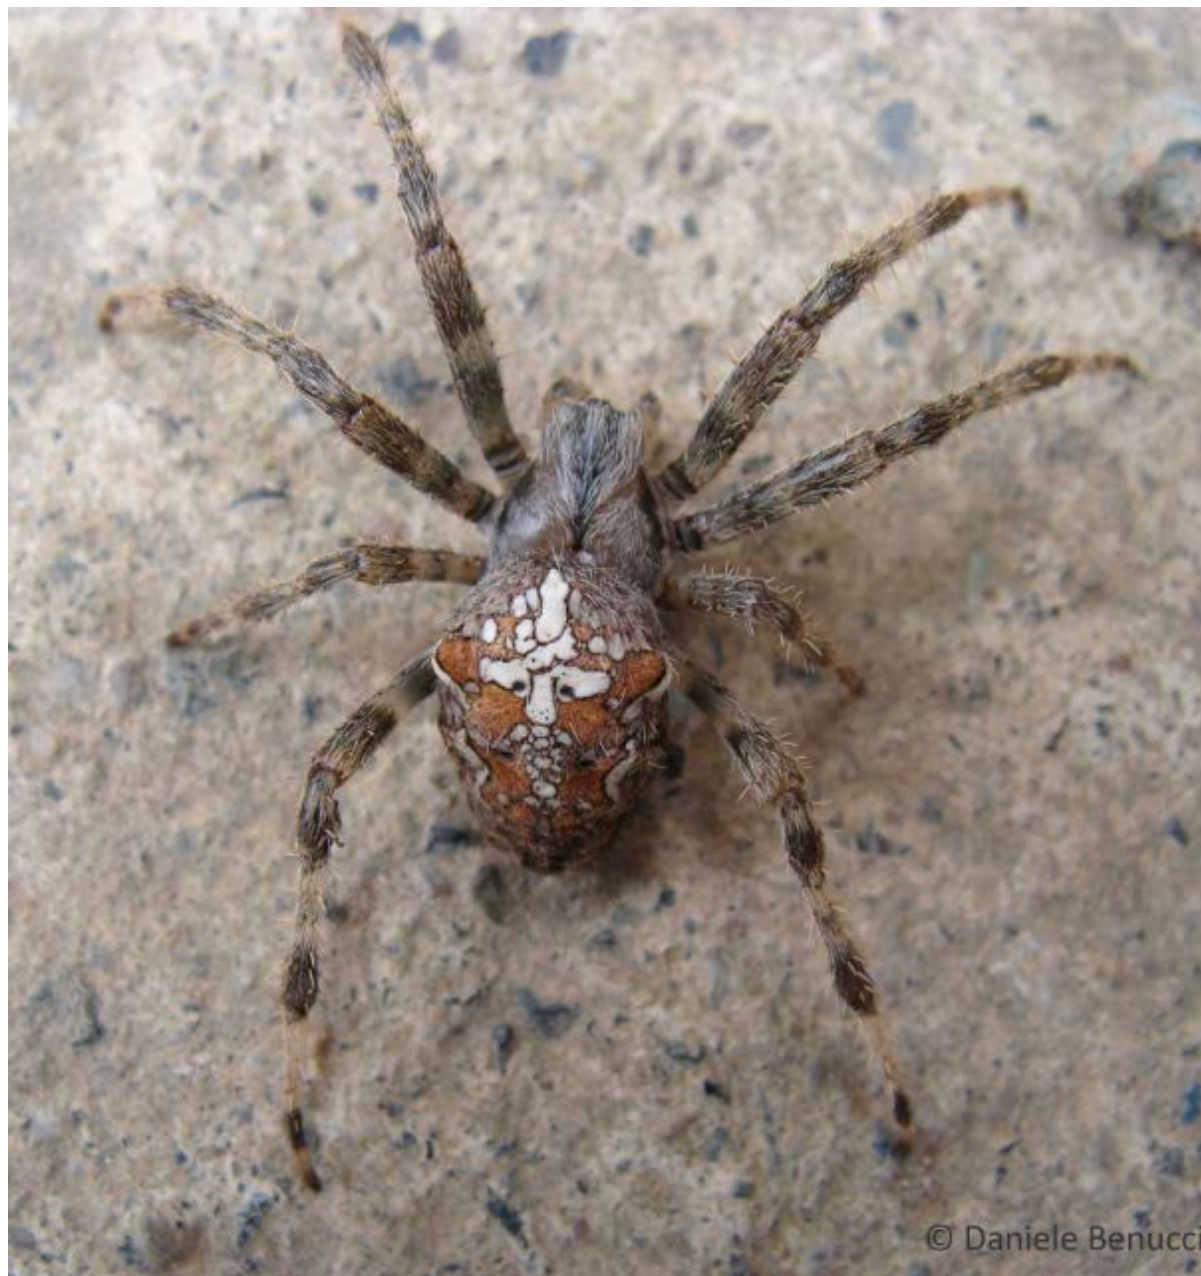

Input

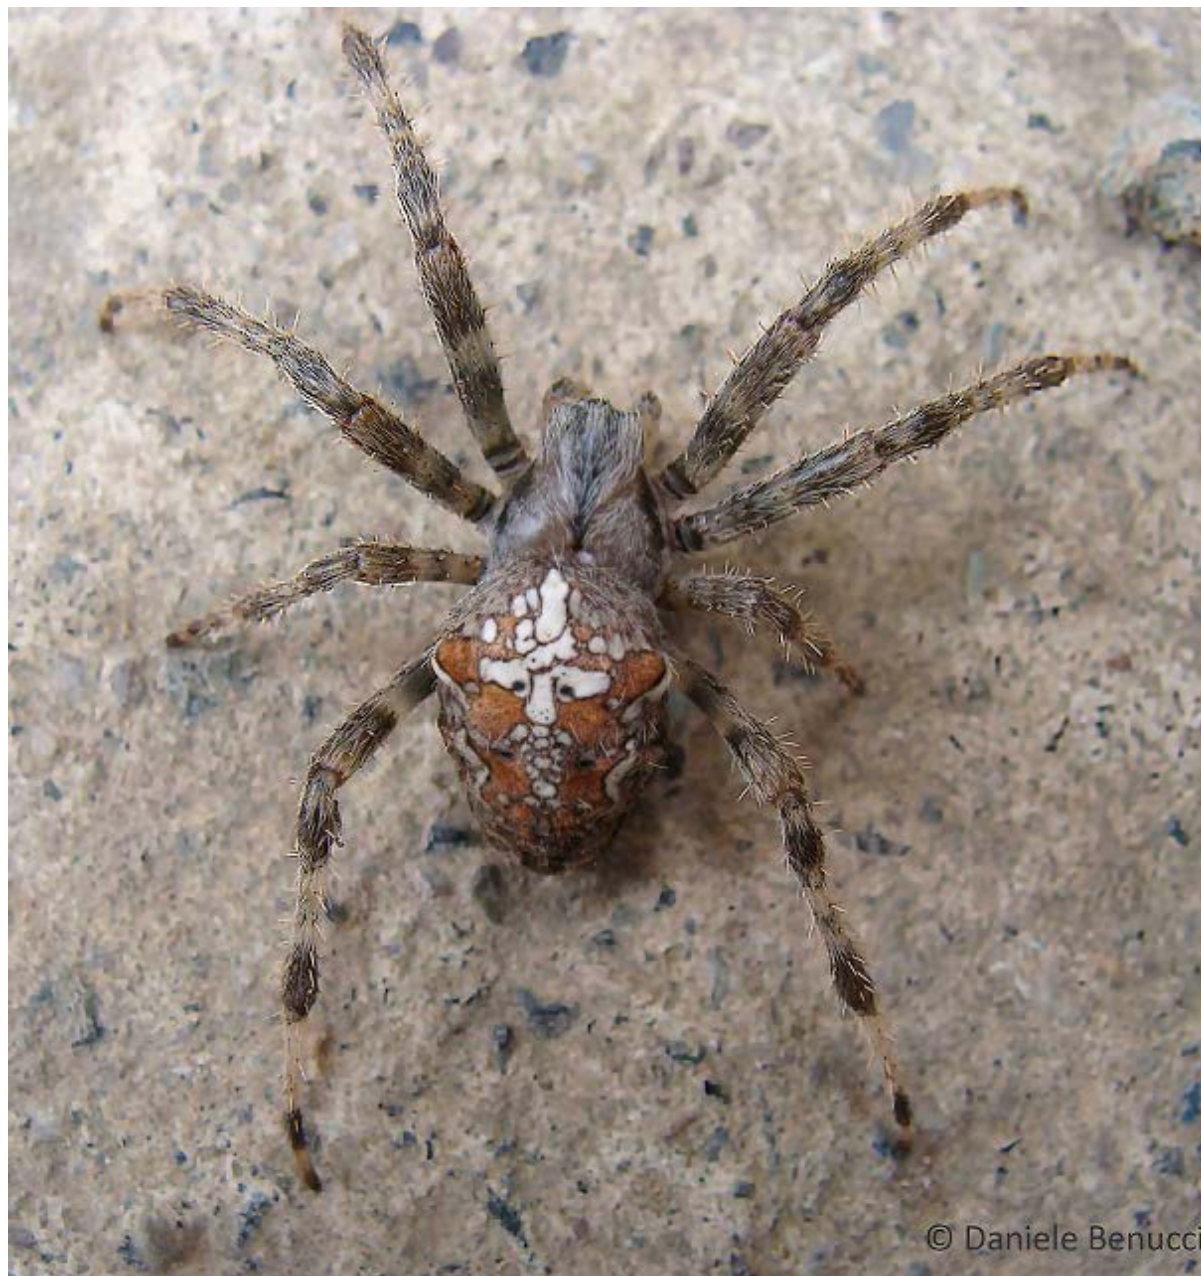

Deblurring result

Figure 9: Depth from defocus map  
estimated by  $DMENet_{BDCS}$ .

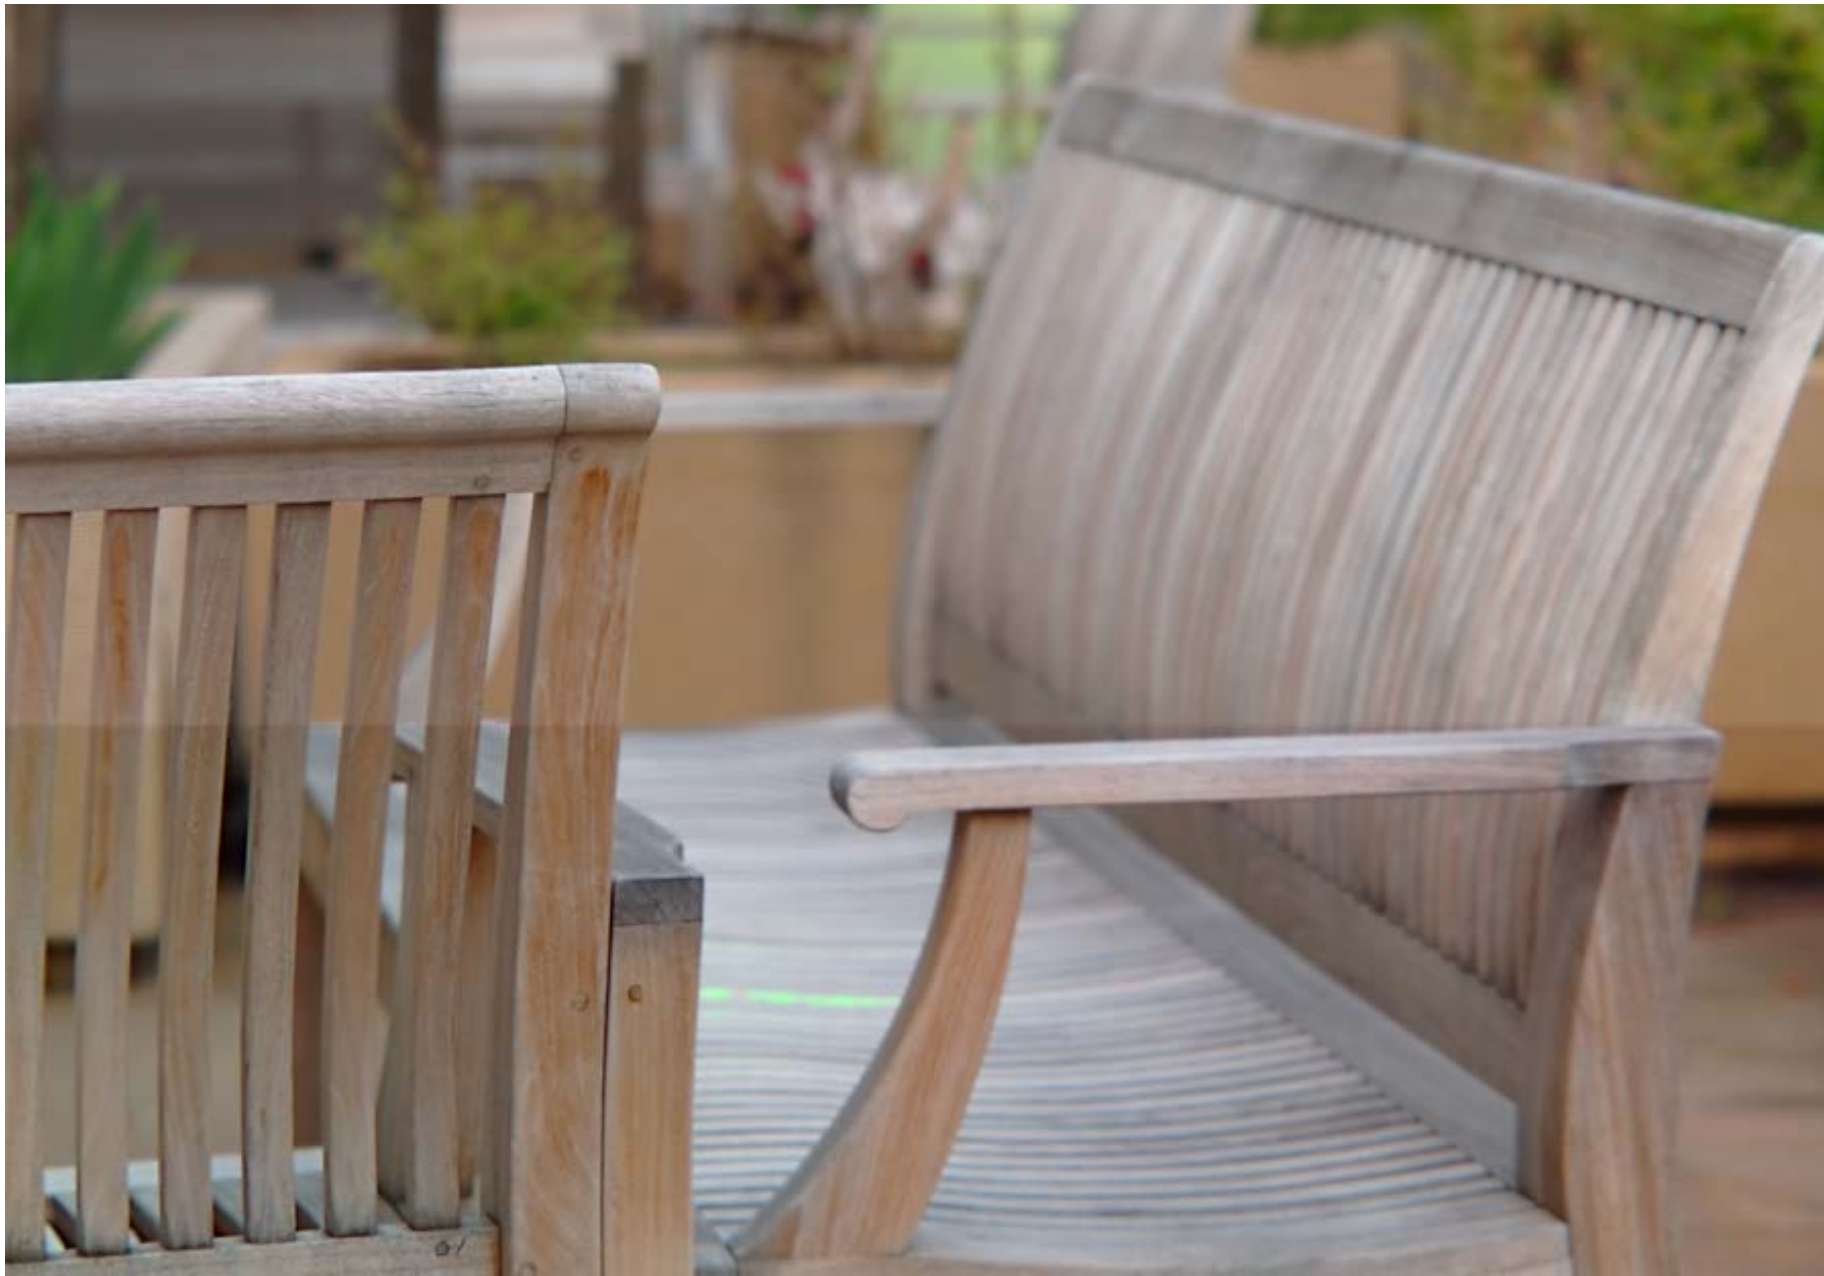

Input

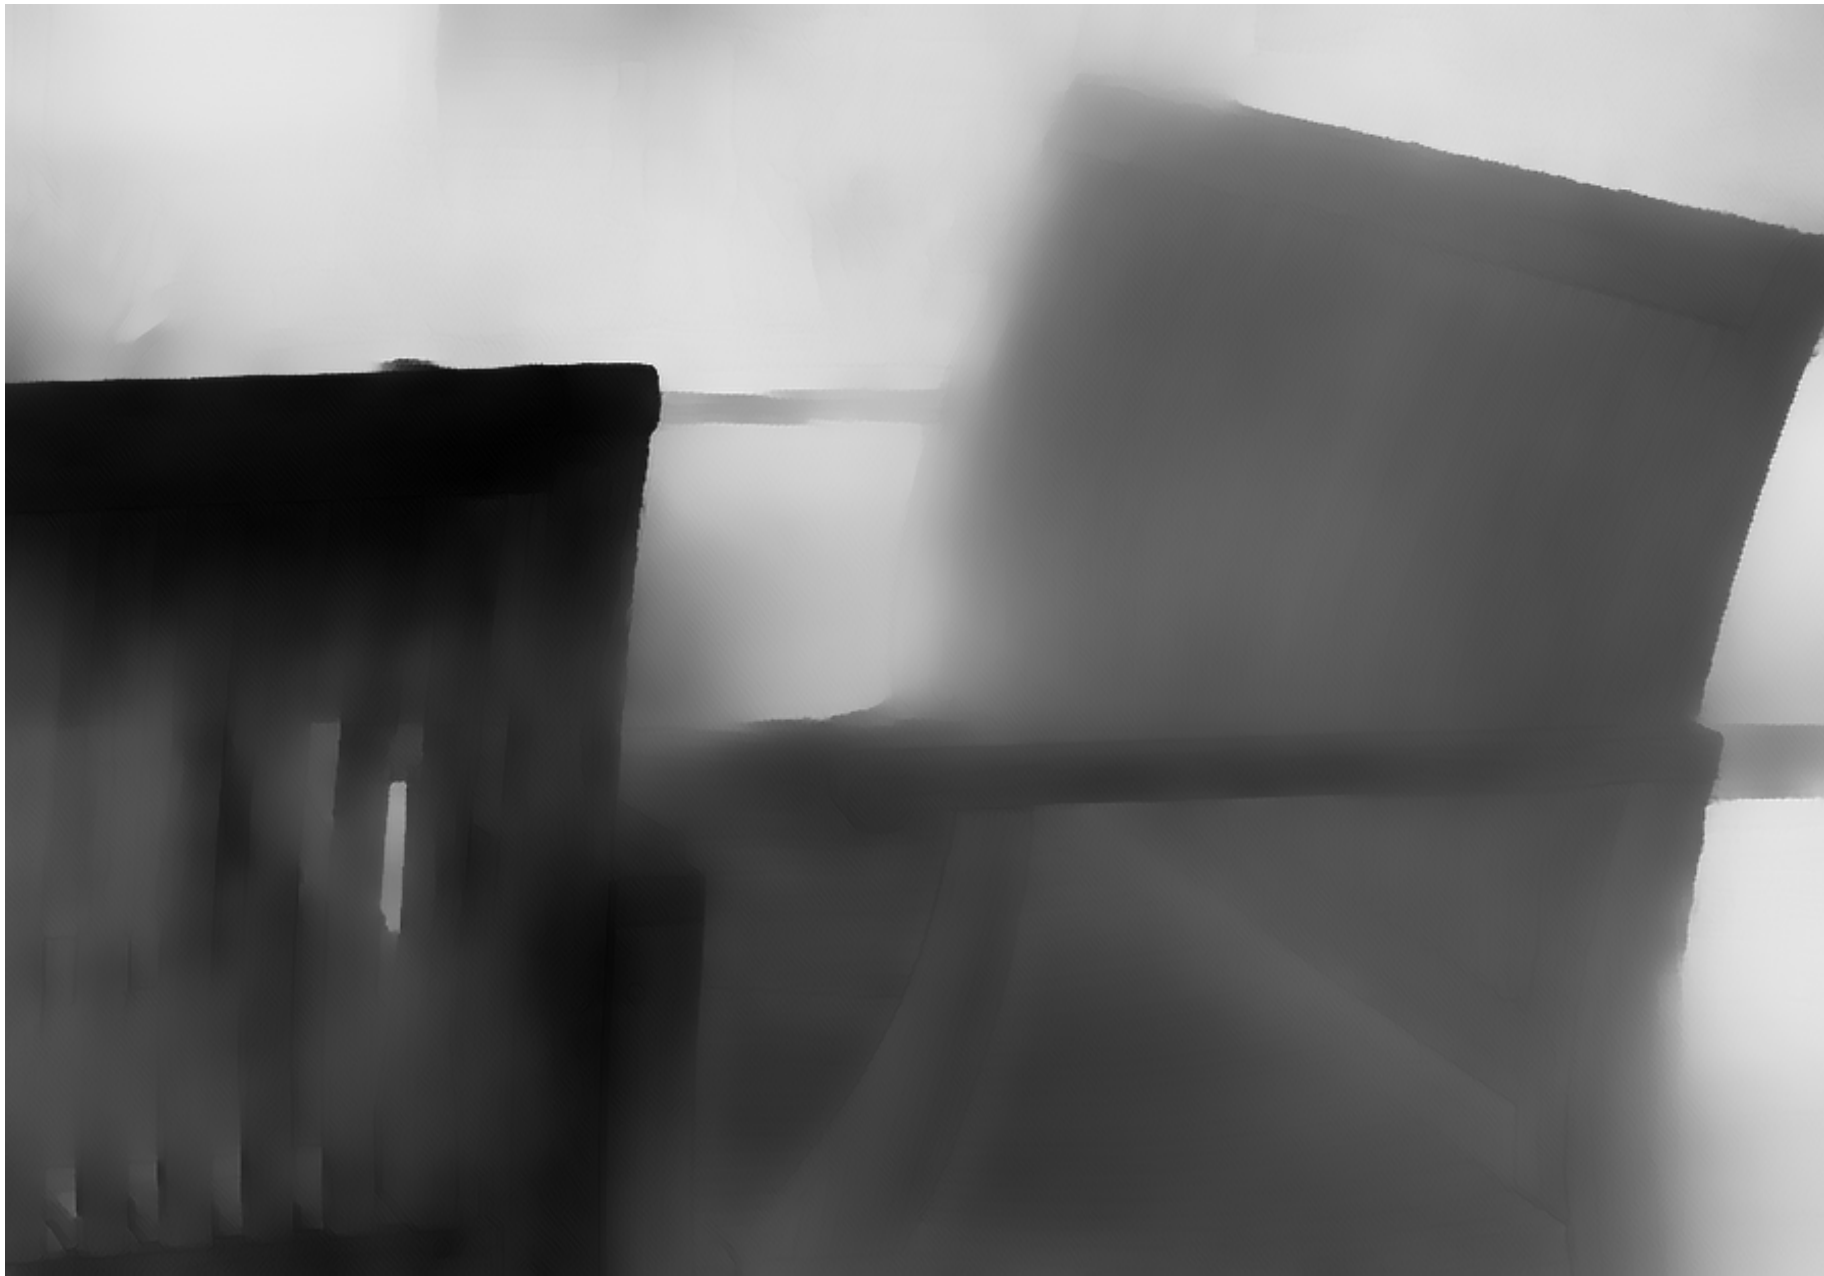

Depth estimation result

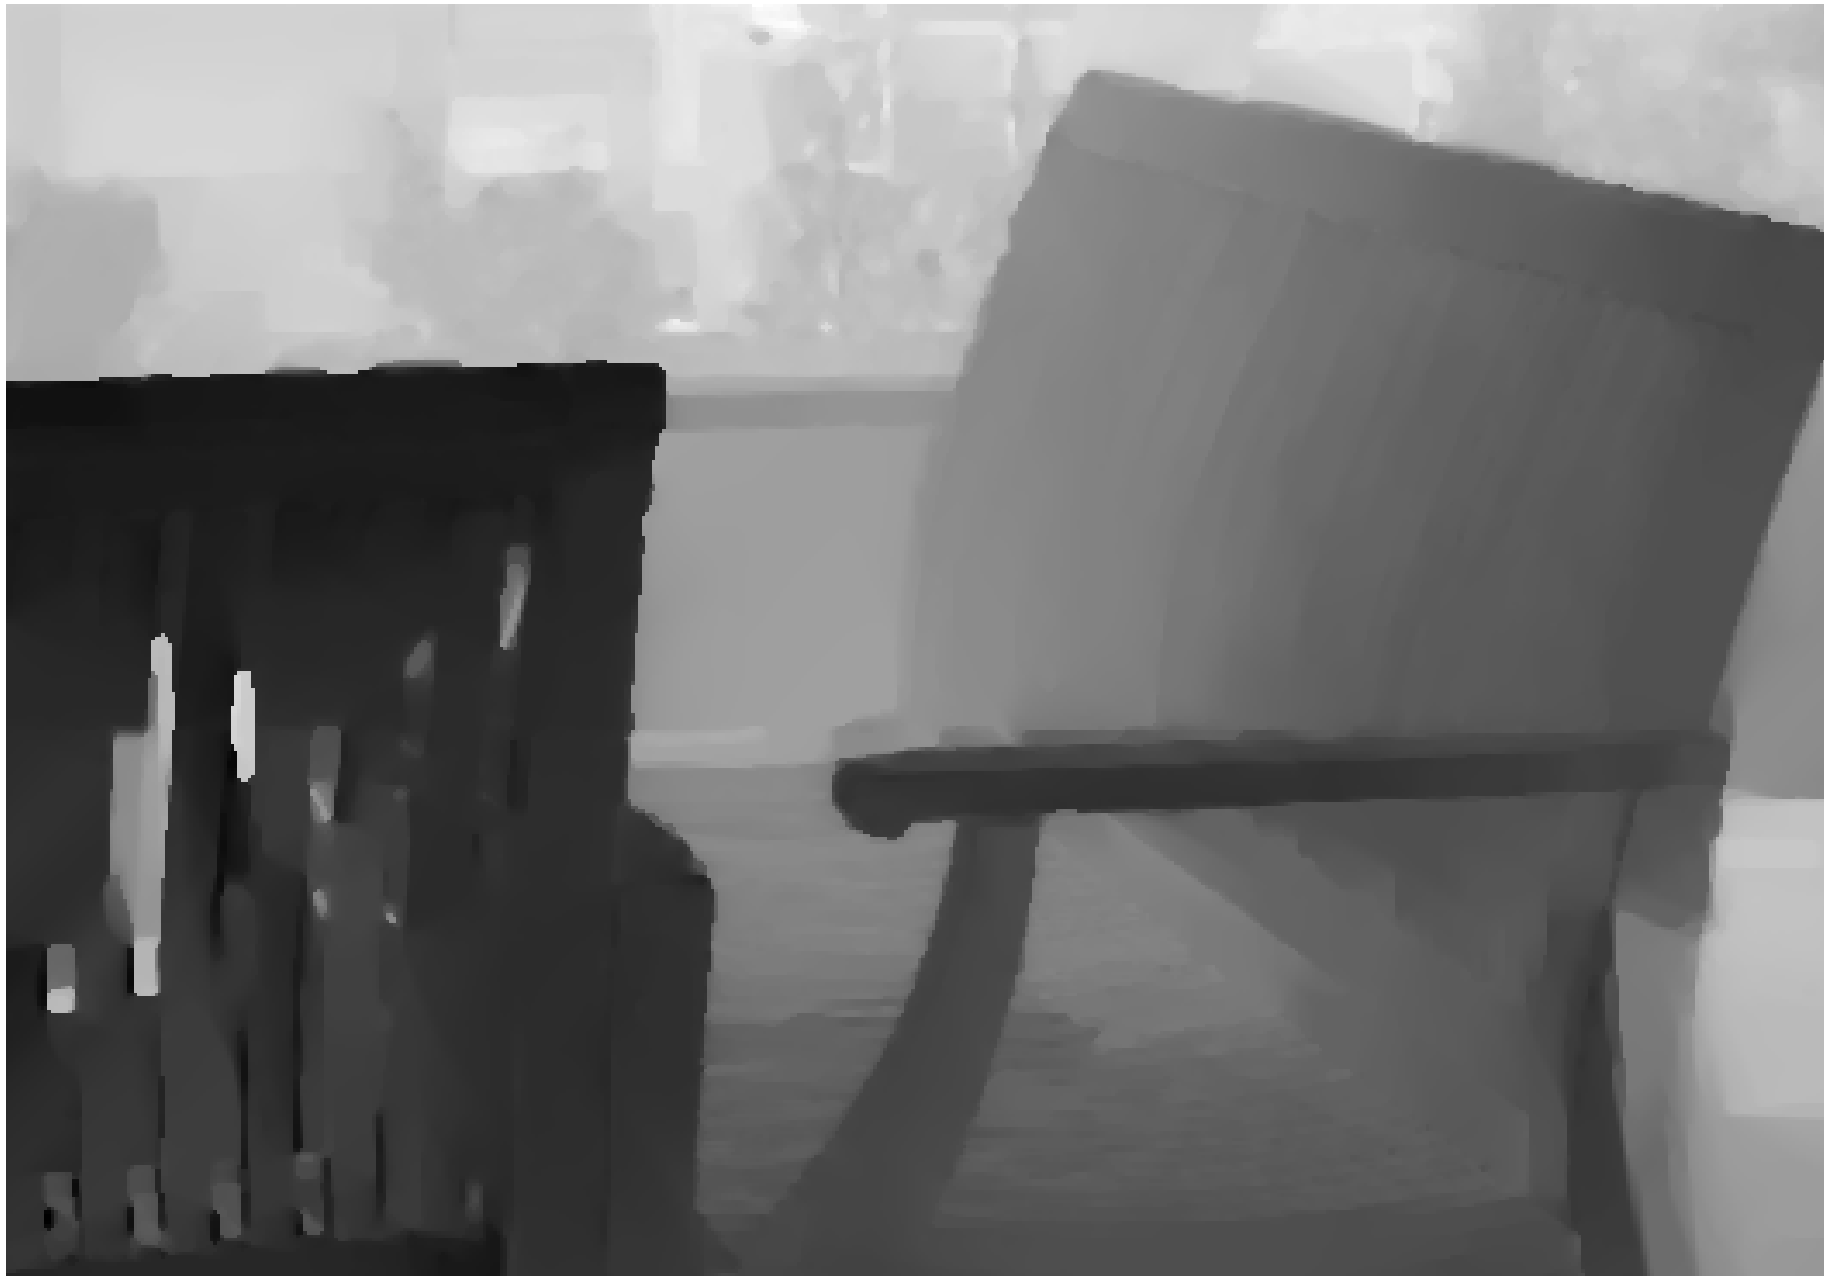

GT

# More qualitative results on CUHK dataset [1]

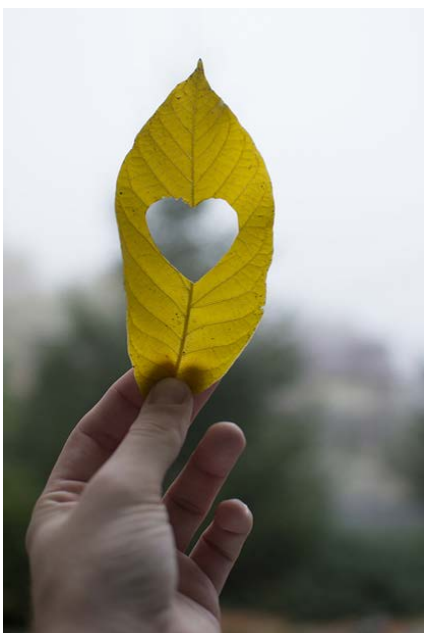

Input

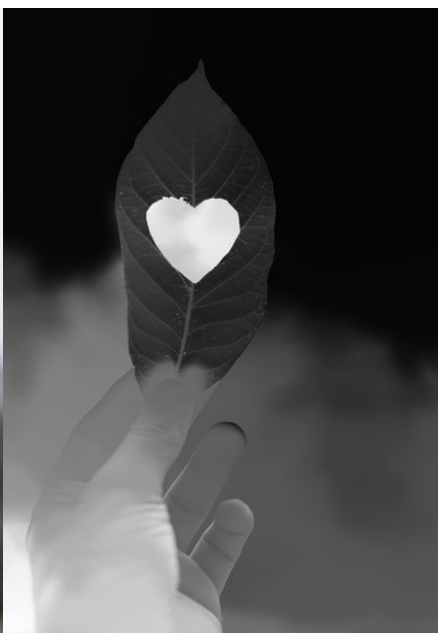

Zhou *et al.* [3]

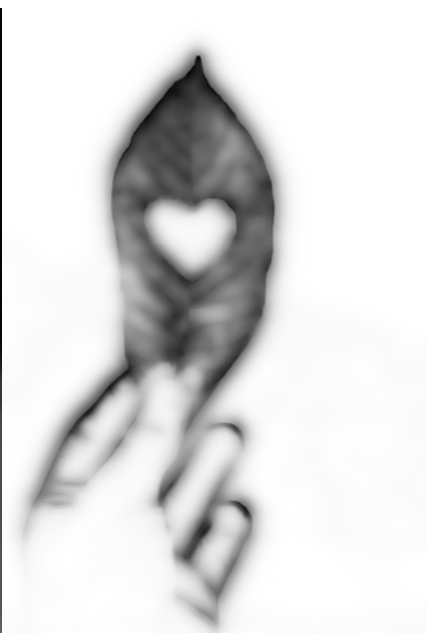

Shi *et al.* [4]

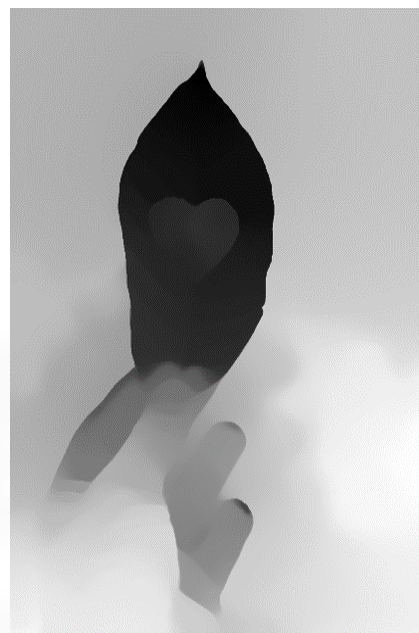

Park *et al.* [5]

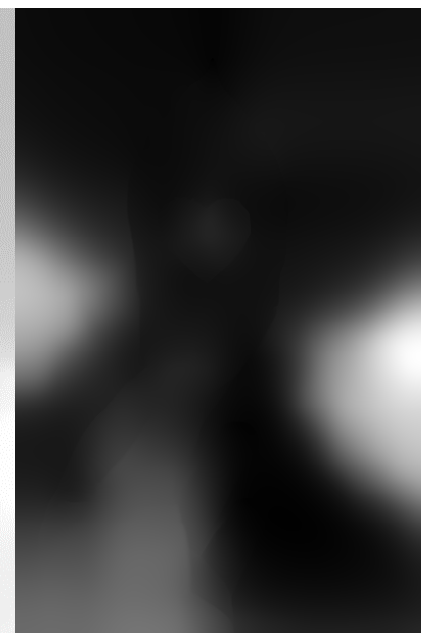

Karaali *et al.* [6]

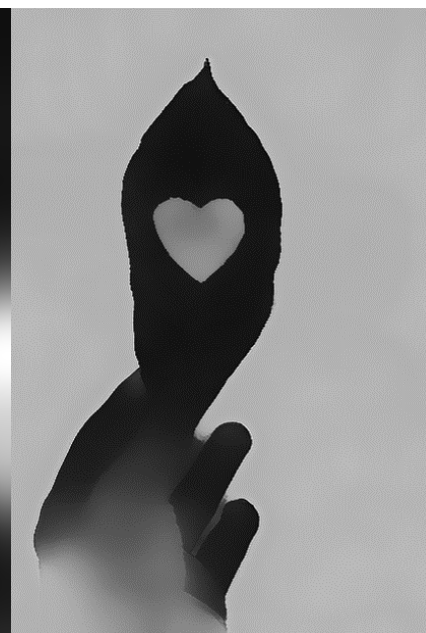

Ours

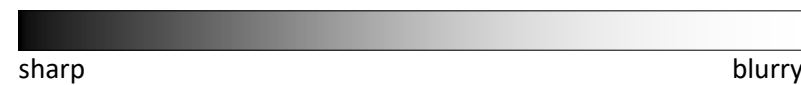

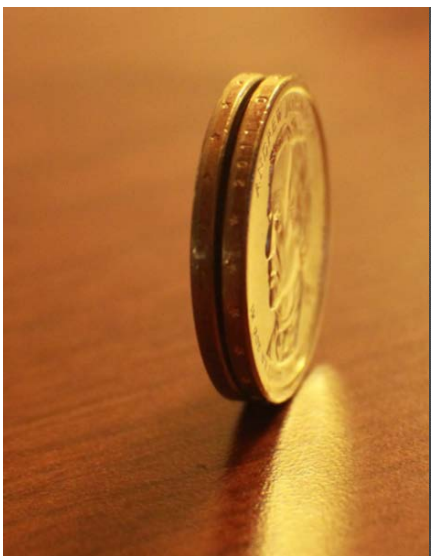

Input

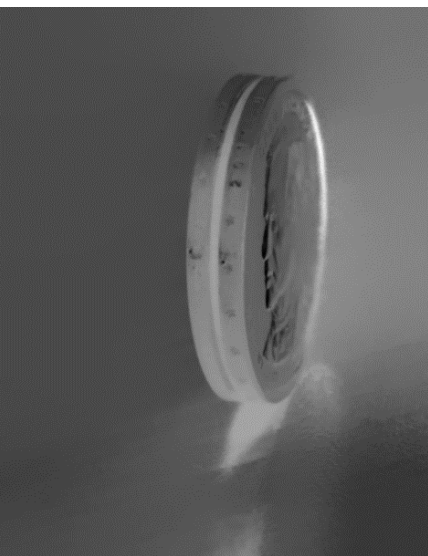

Zhou *et al.* [3]

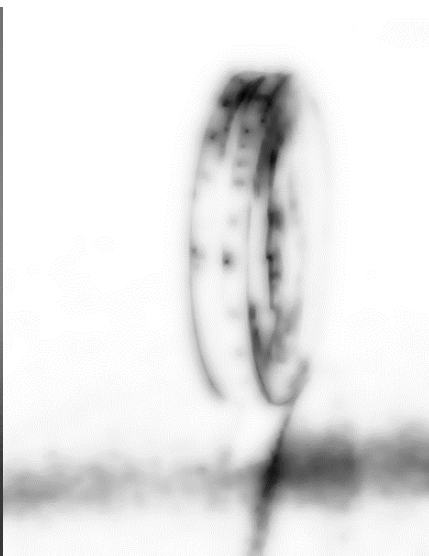

Shi *et al.* [4]

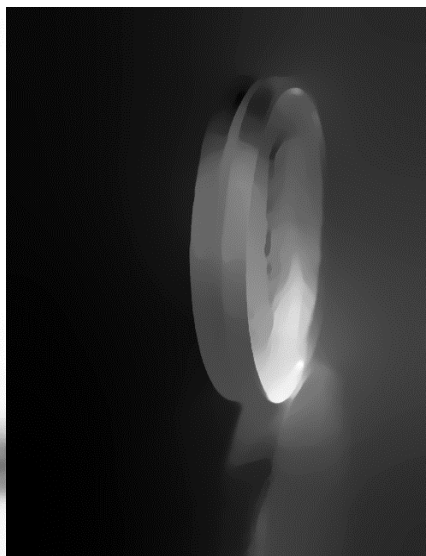

Park *et al.* [5]

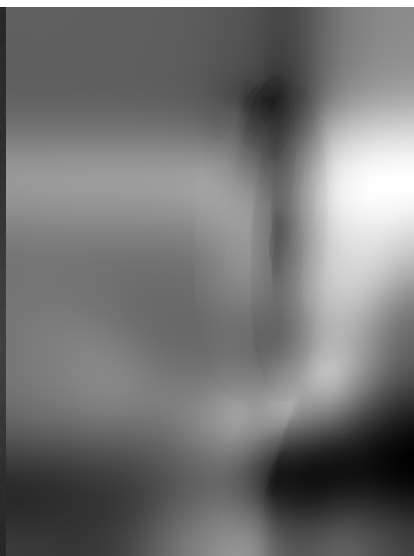

Karaali *et al.* [6]

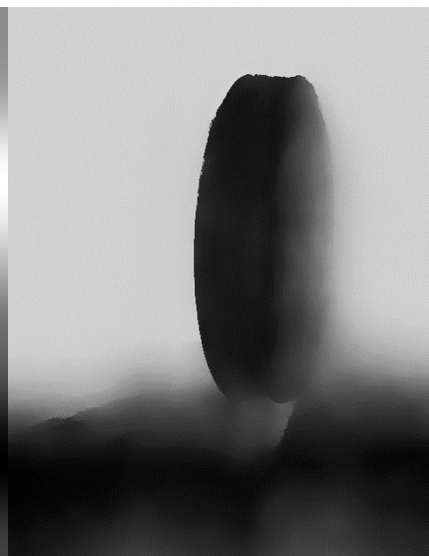

Ours

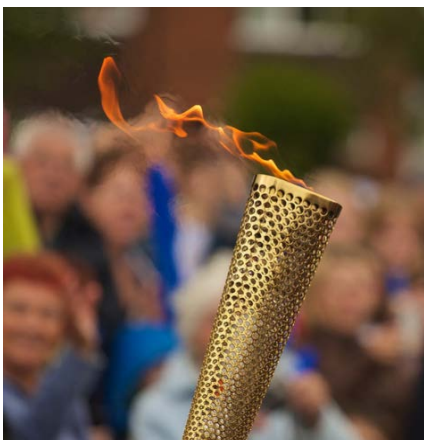

Input

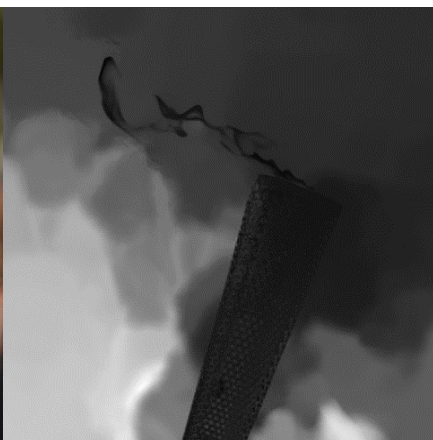

Zhou *et al.* [3]

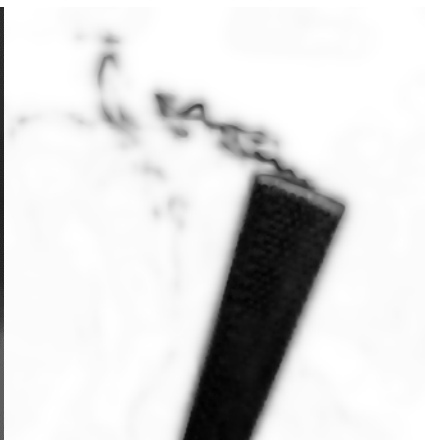

Shi *et al.* [4]

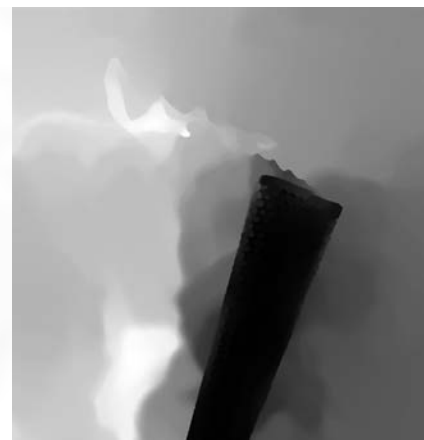

Park *et al.* [5]

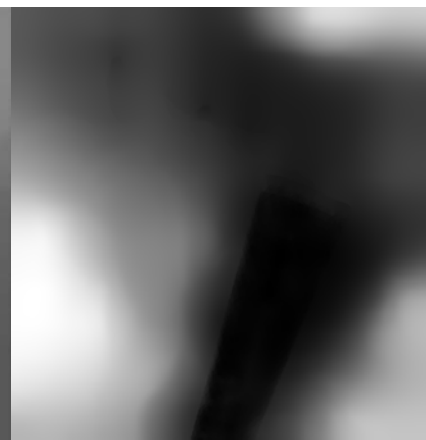

Karaali *et al.* [6]

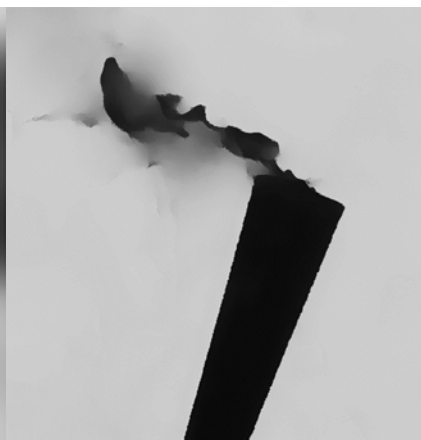

Ours

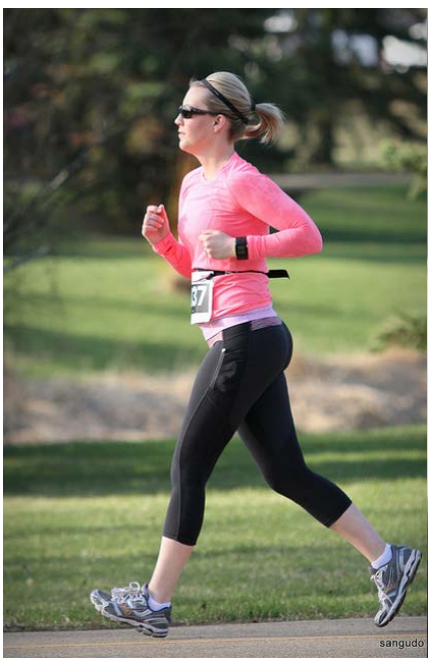

Input

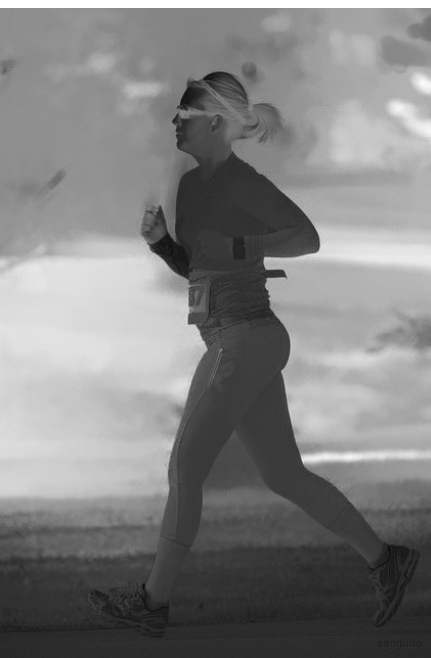

Zhou *et al.* [3]

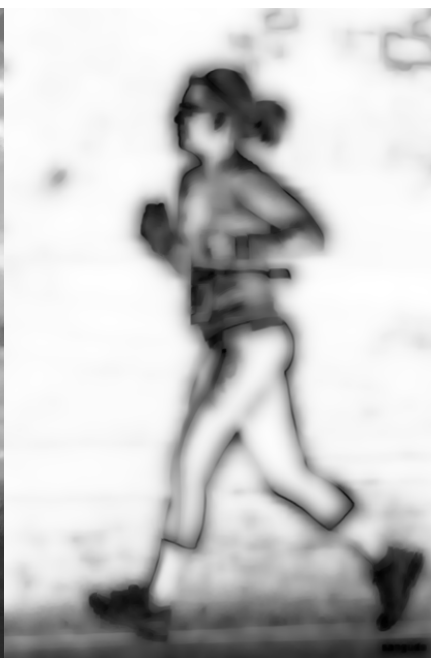

Shi *et al.* [4]

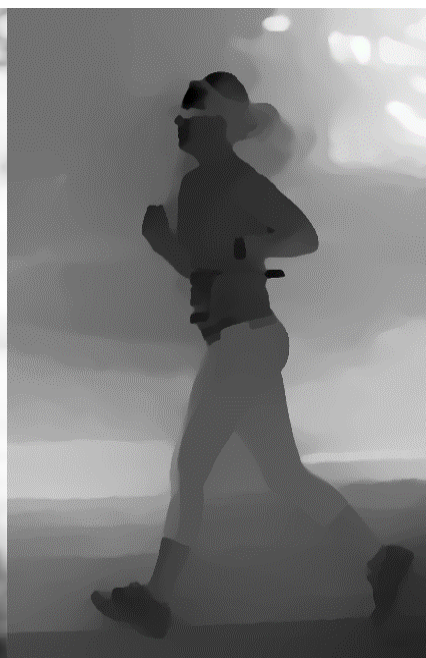

Park *et al.* [5]

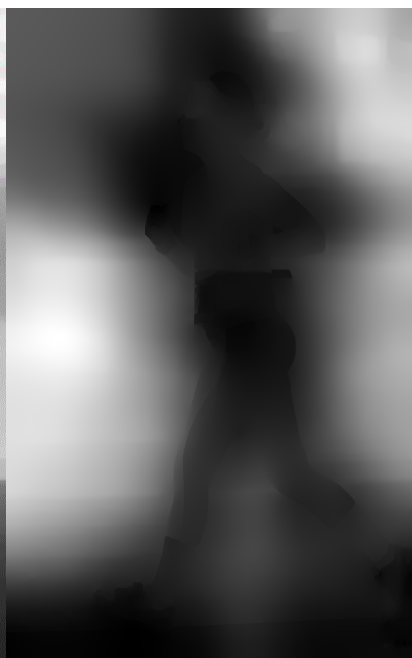

Karaali *et al.* [6]

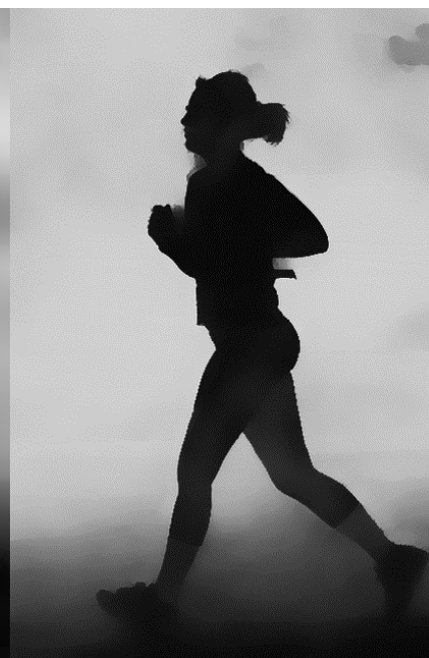

Ours

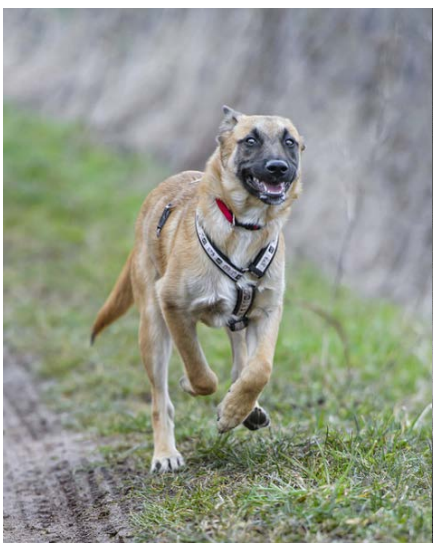

Input

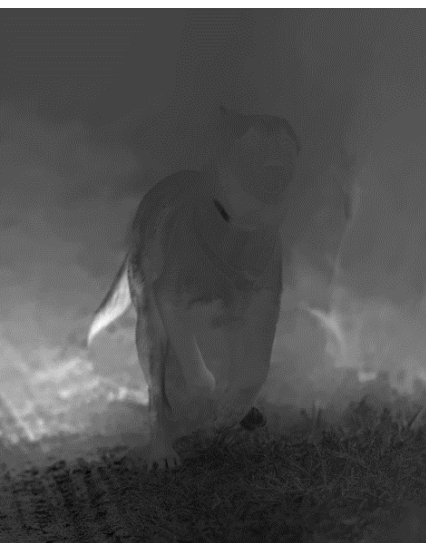

Zhou *et al.* [3]

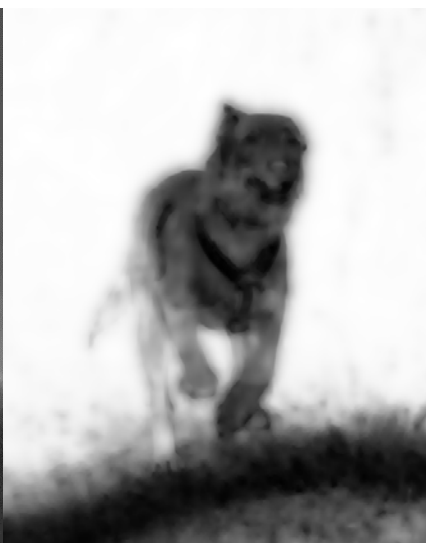

Shi *et al.* [4]

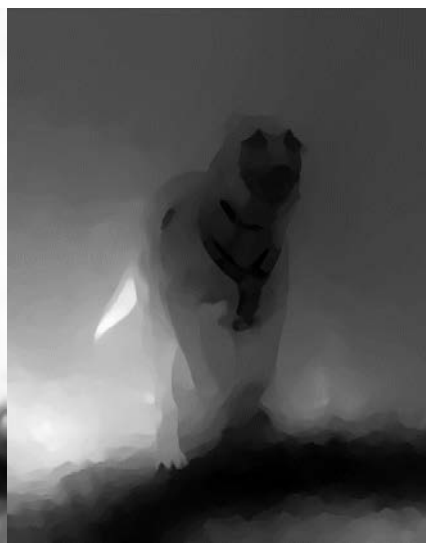

Park *et al.* [5]

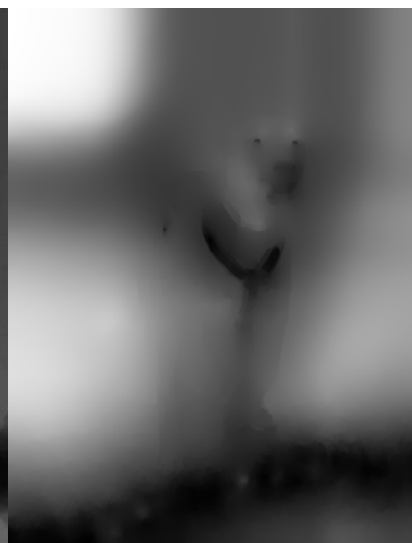

Karaali *et al.* [6]

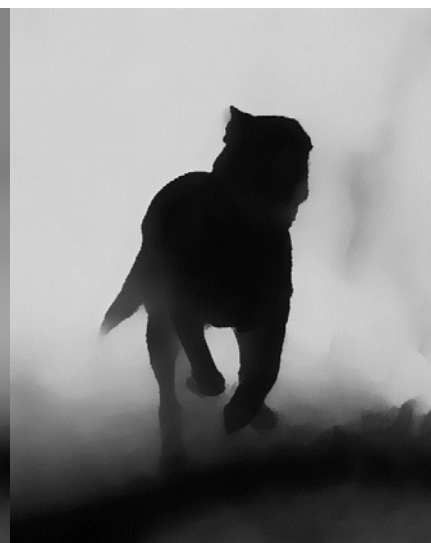

Ours

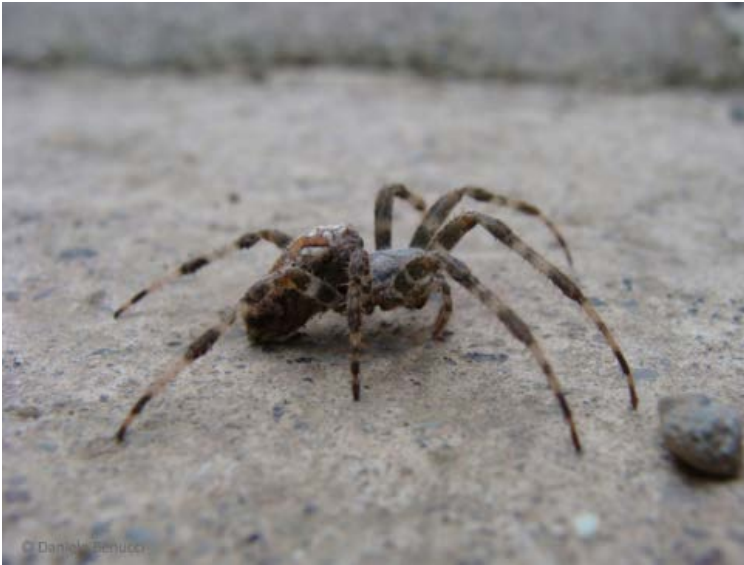

Input

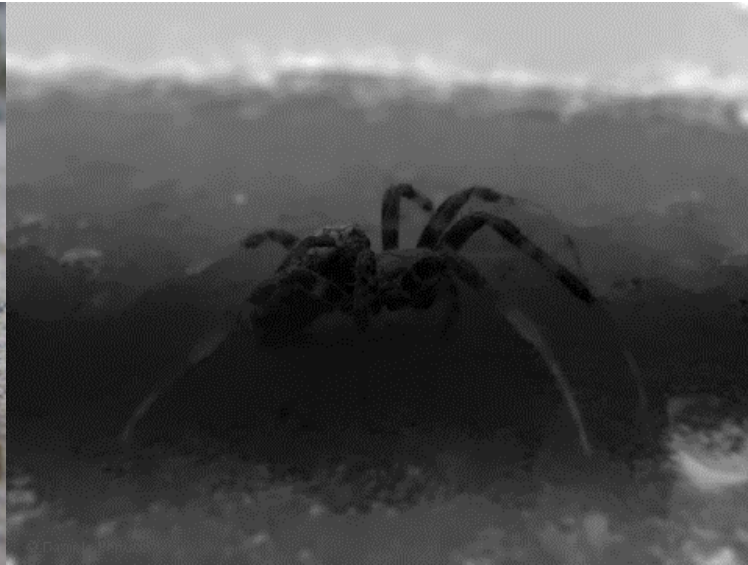

Zhou *et al.* [3]

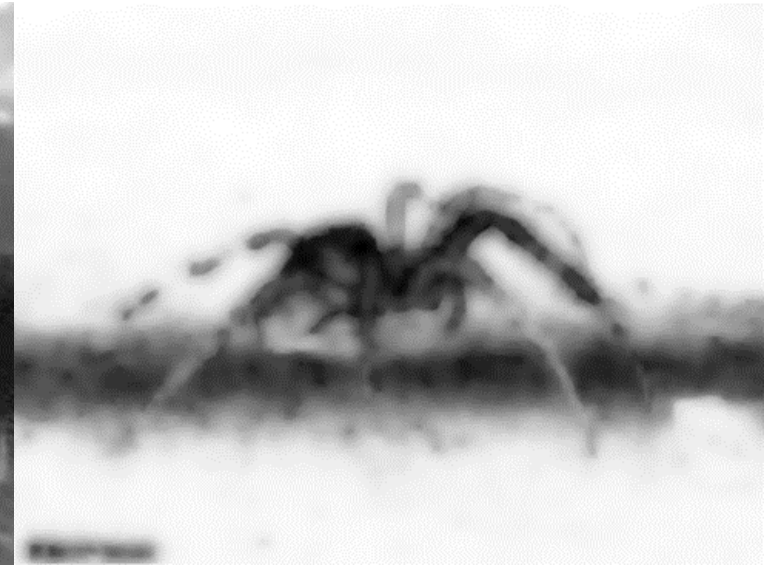

Shi *et al.* [4]

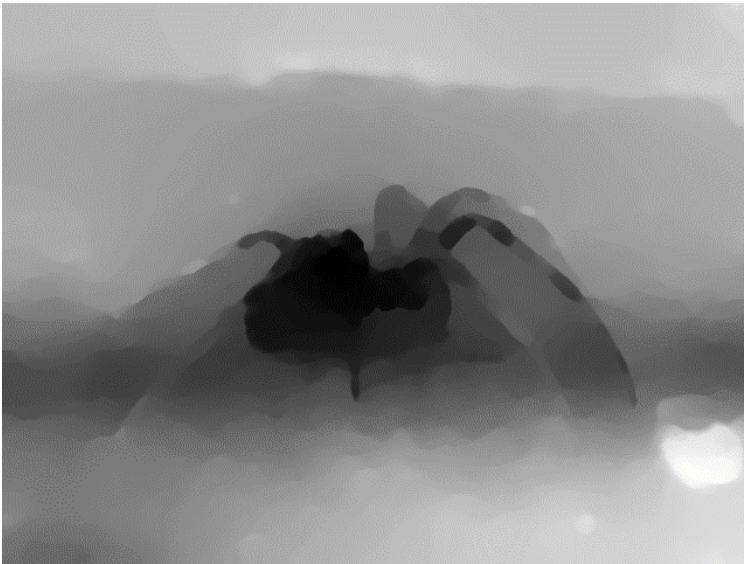

Park *et al.* [5]

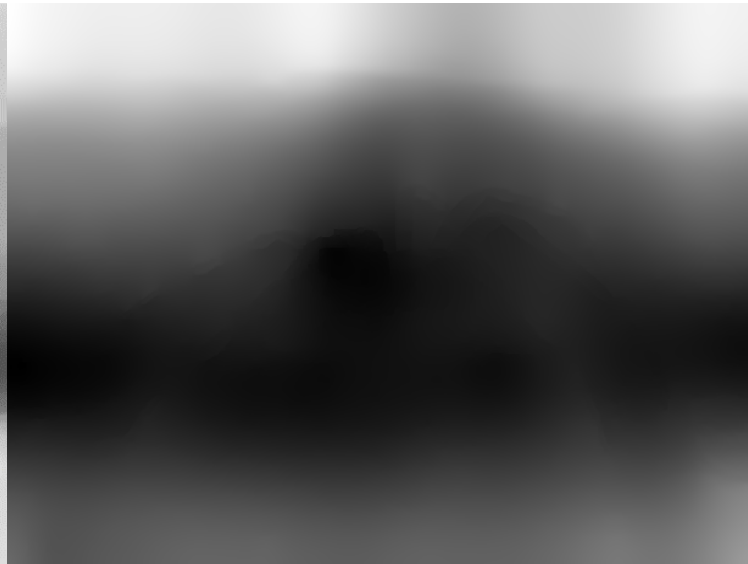

Karaali *et al.* [6]

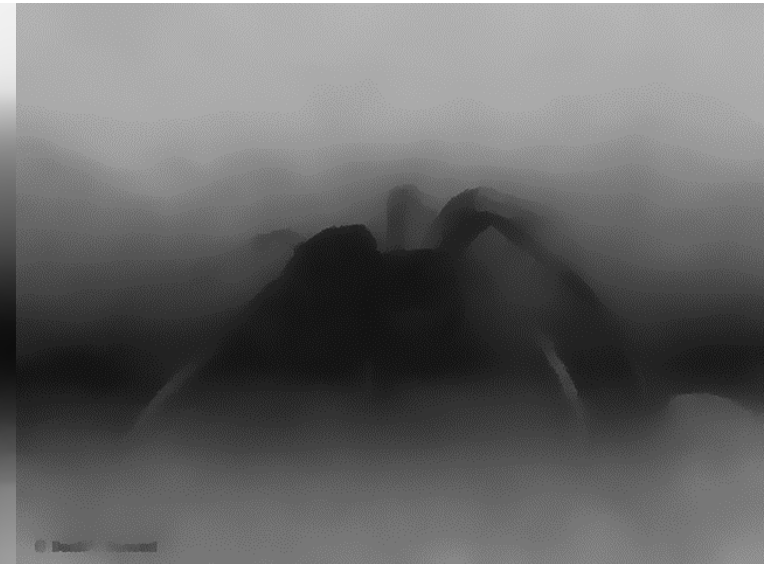

Ours

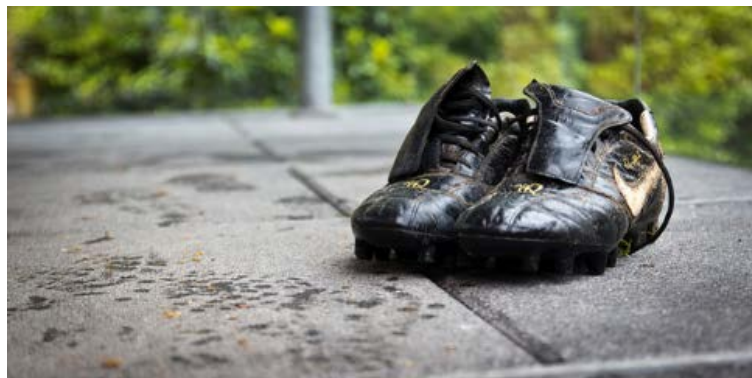

Input

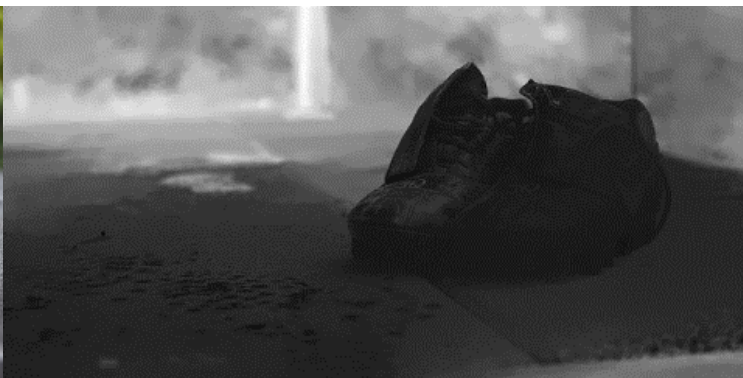

Zhou *et al.* [3]

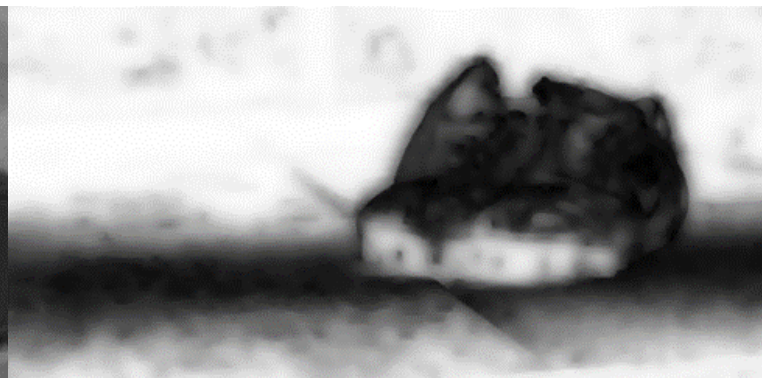

Shi *et al.* [4]

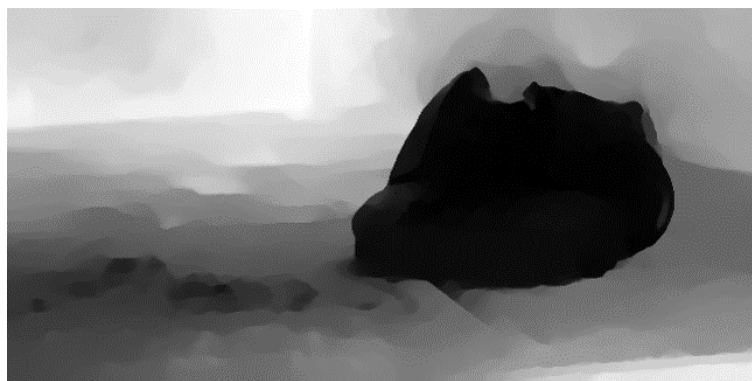

Park *et al.* [5]

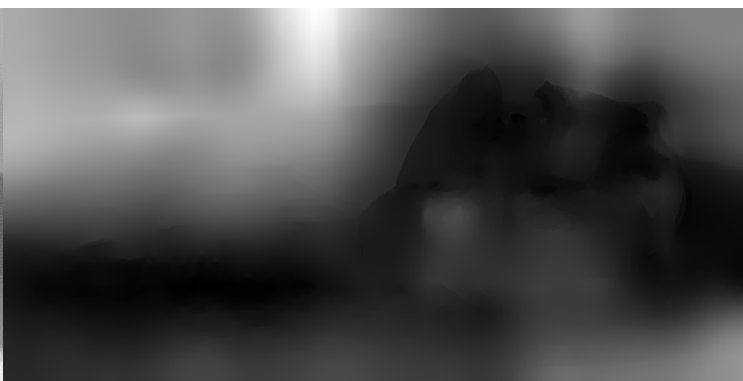

Karaali *et al.* [6]

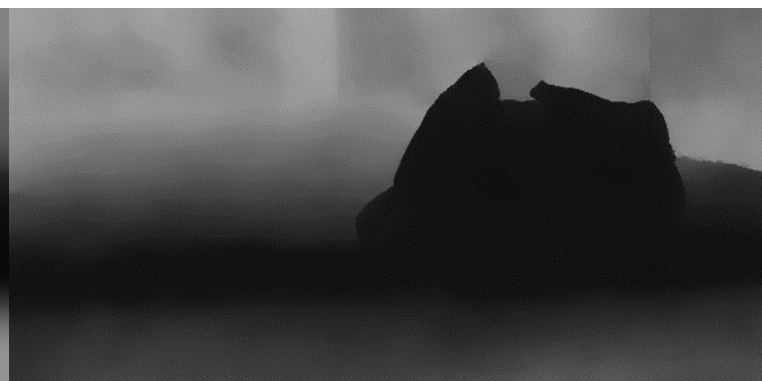

Ours

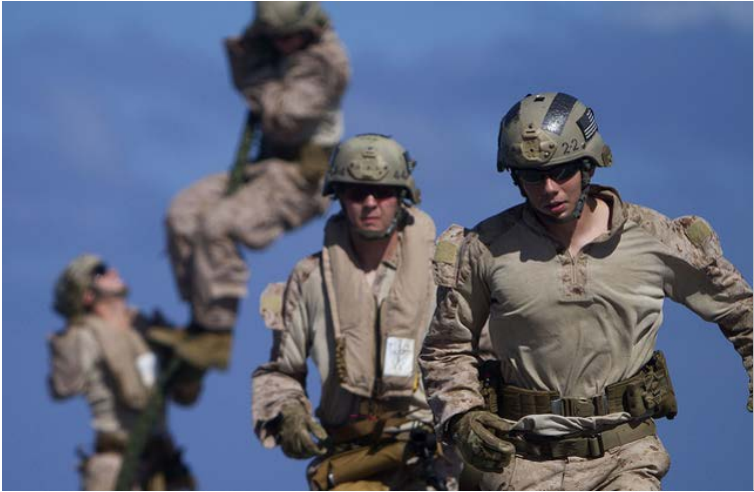

Input

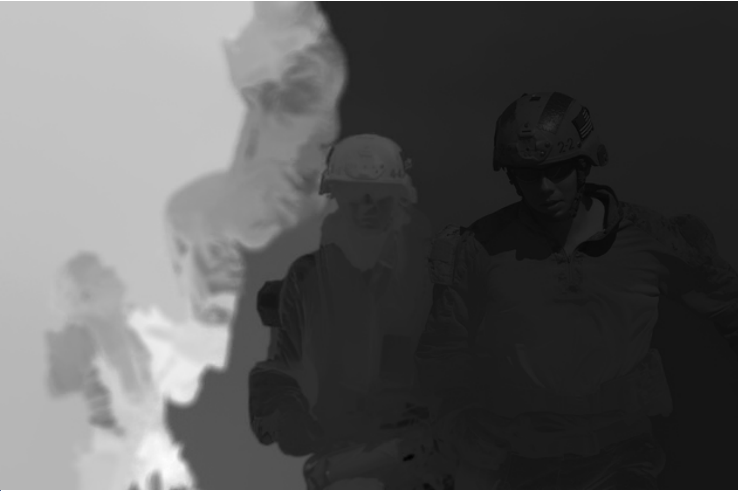

Zhou *et al.* [3]

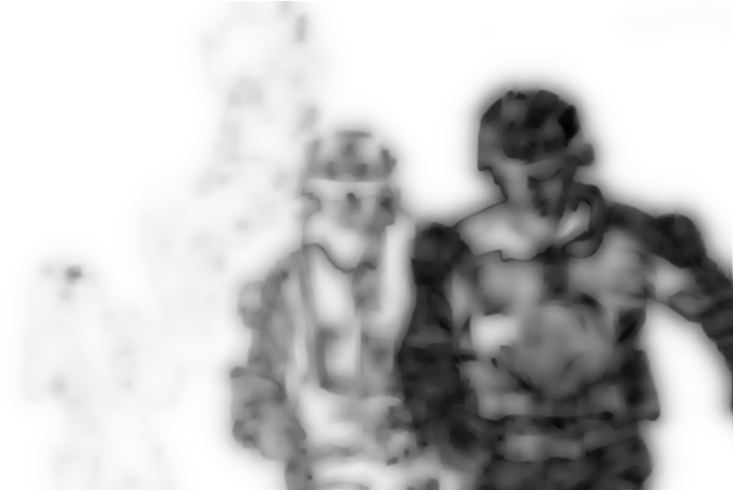

Shi *et al.* [4]

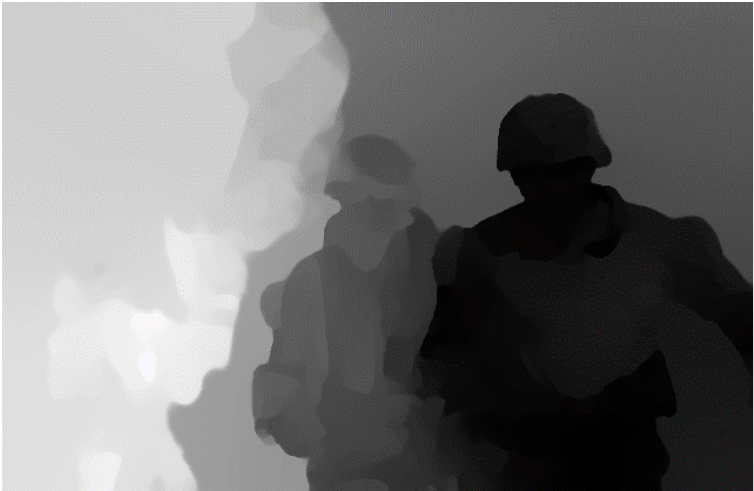

Park *et al.* [5]

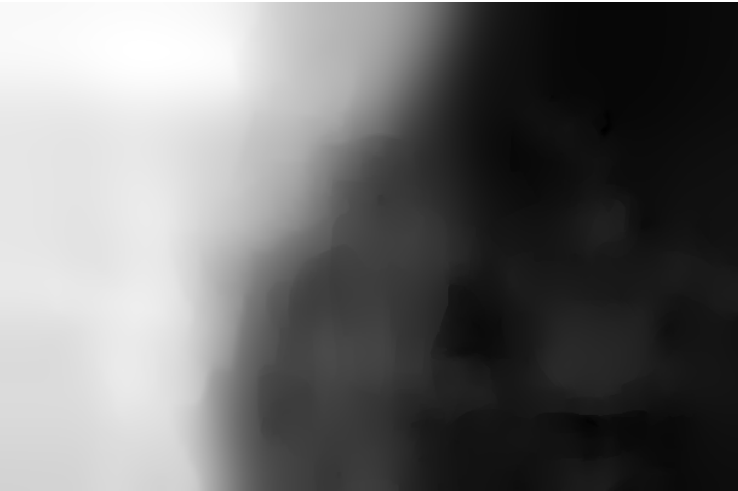

Karaali *et al.* [6]

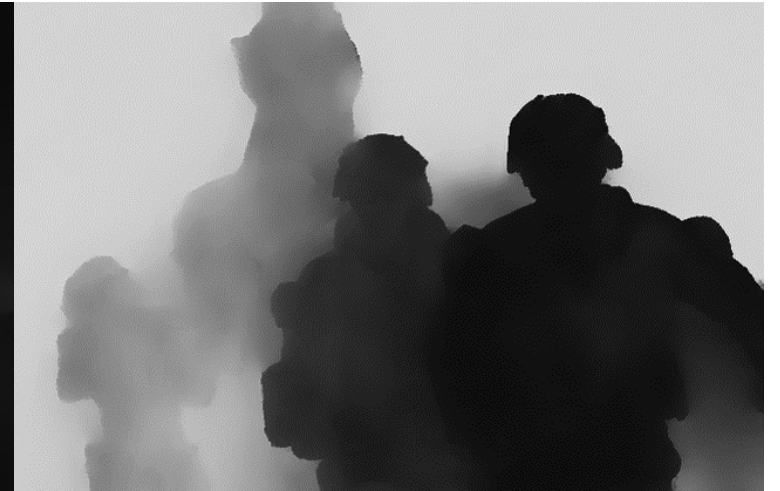

Ours

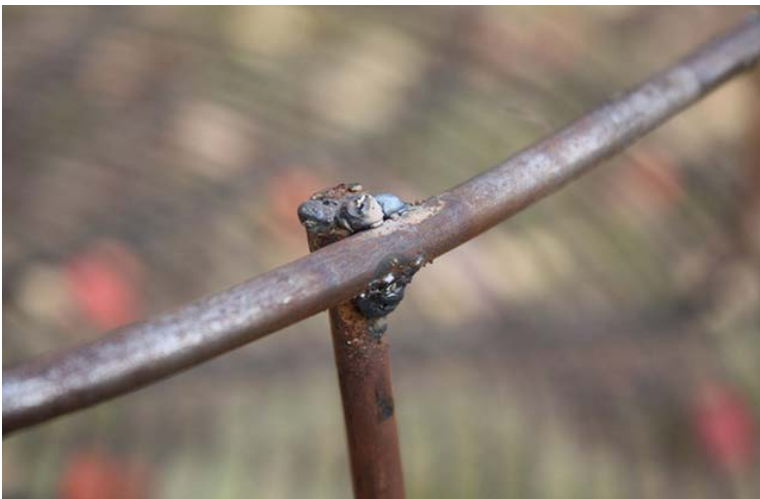

Input

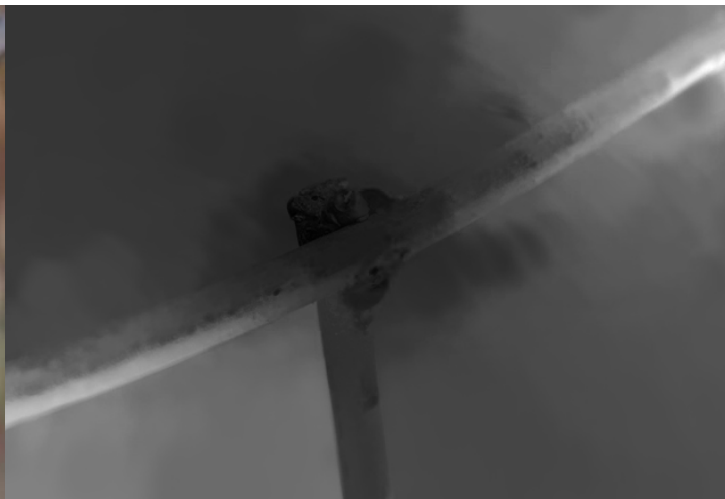

Zhou *et al.* [3]

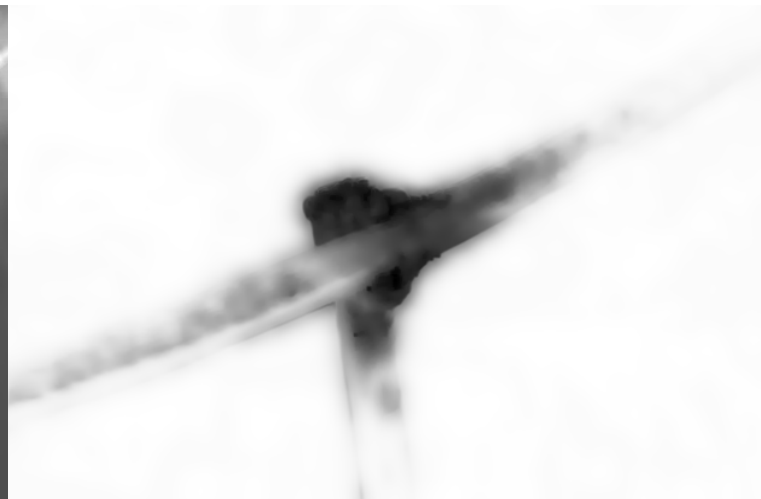

Shi *et al.* [4]

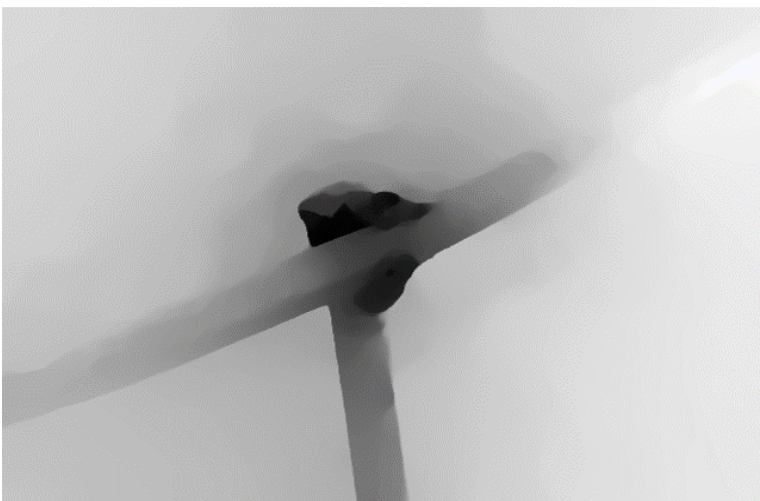

Park *et al.* [5]

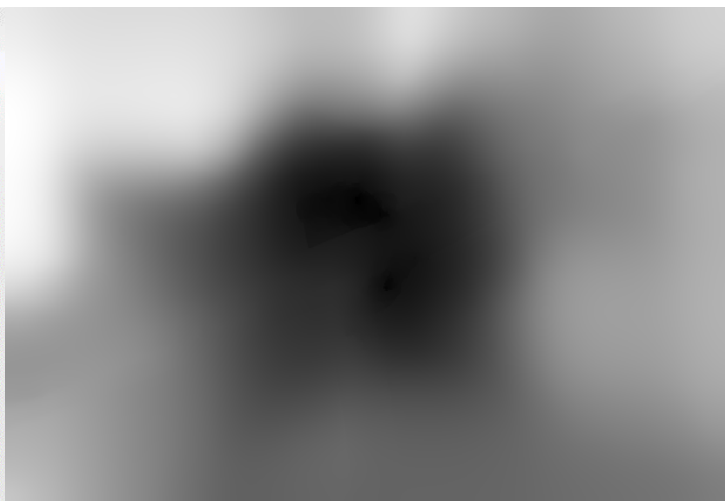

Karaali *et al.* [6]

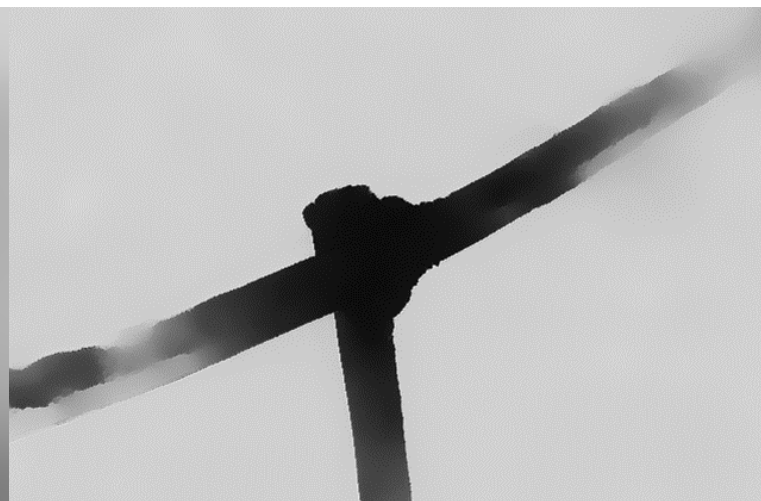

Ours

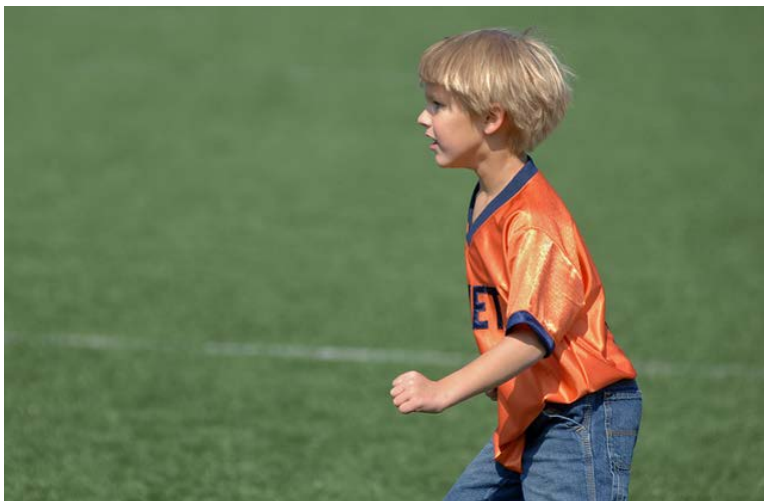

Input

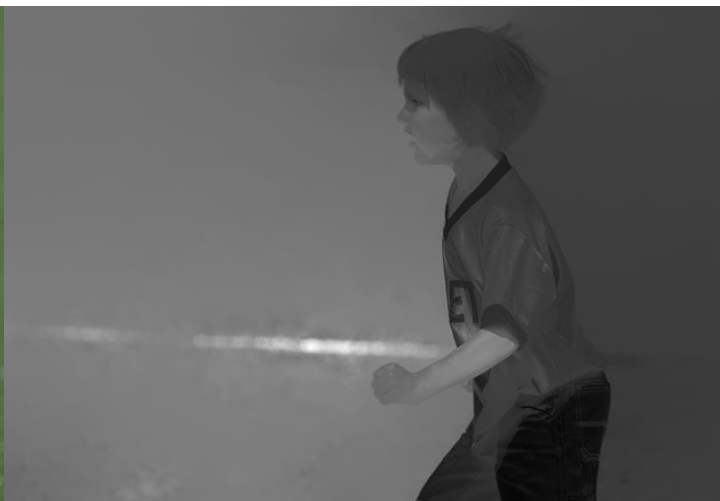

Zhou *et al.* [3]

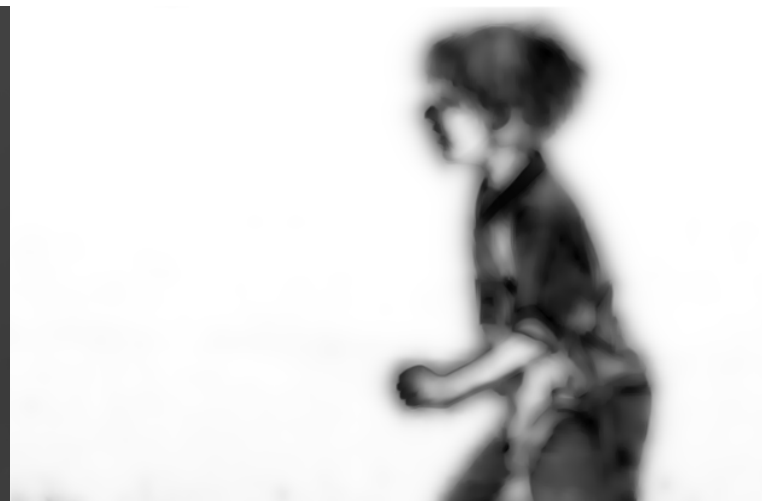

Shi *et al.* [4]

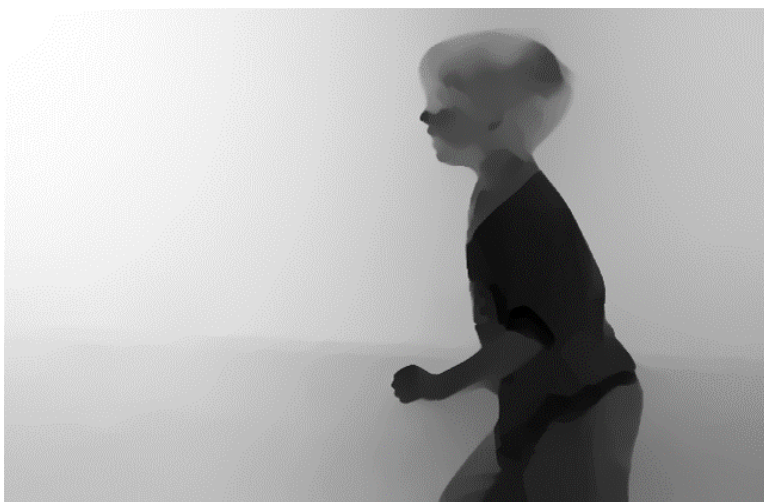

Park *et al.* [5]

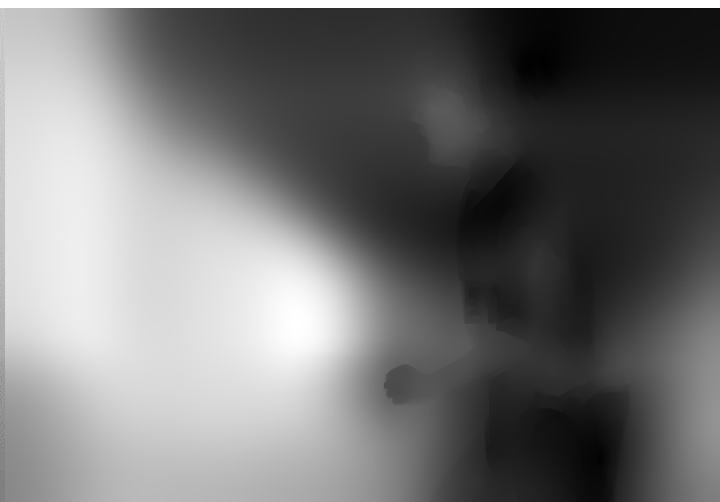

Karaali *et al.* [6]

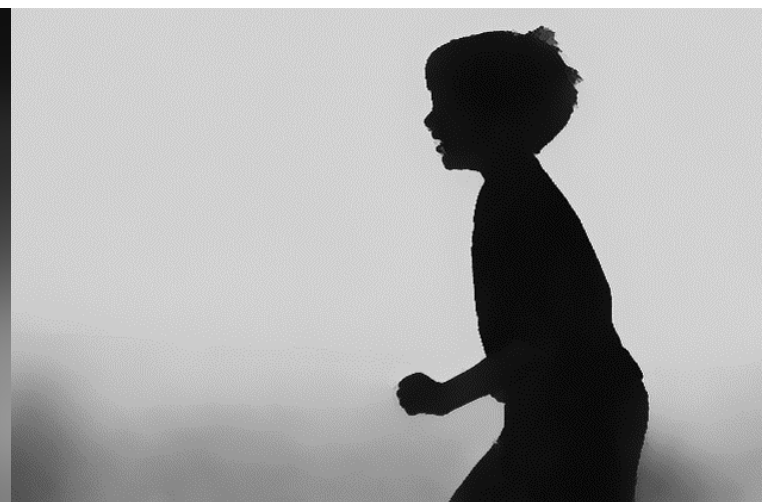

Ours

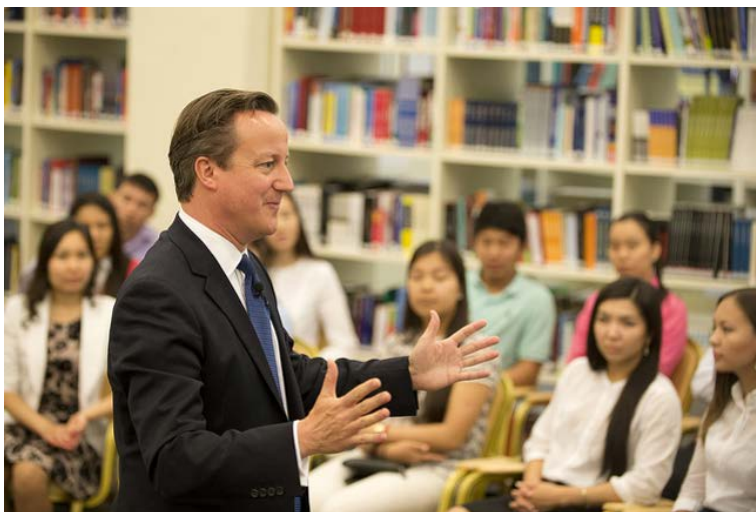

Input

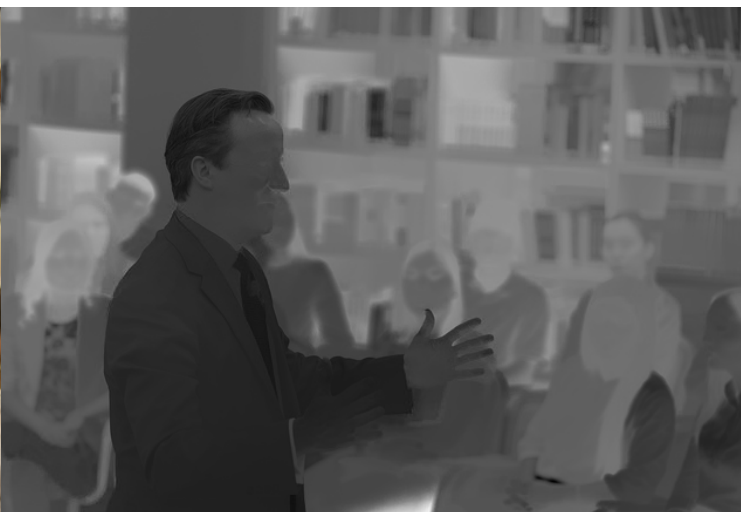

Zhou *et al.* [3]

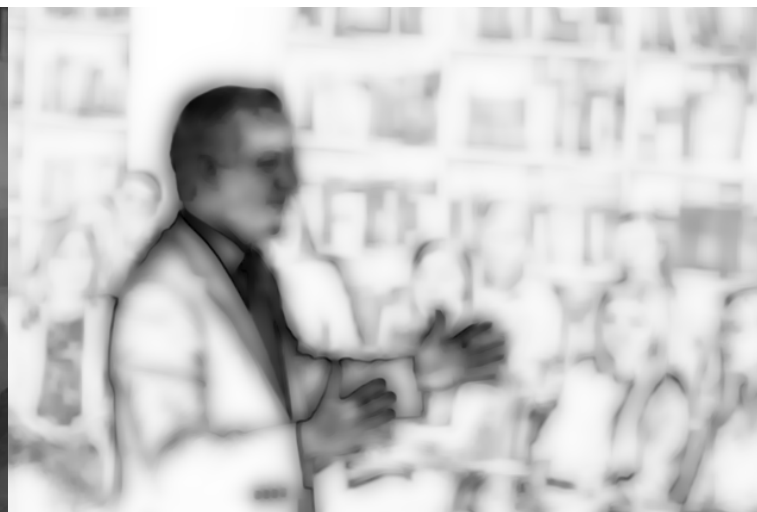

Shi *et al.* [4]

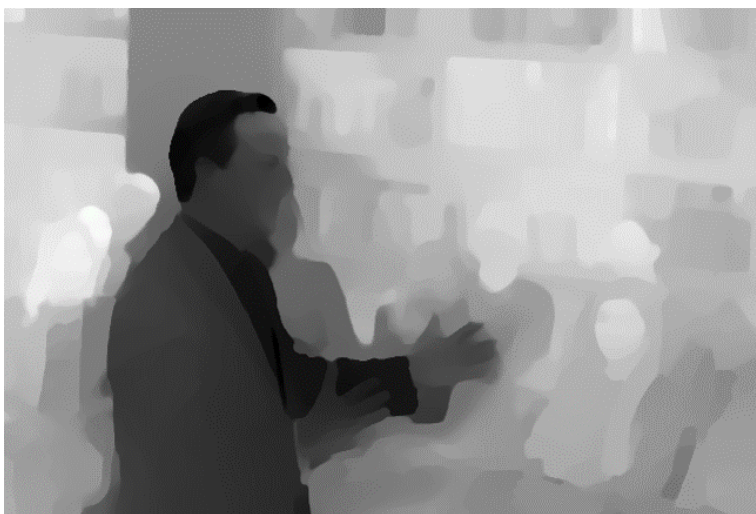

Park *et al.* [5]

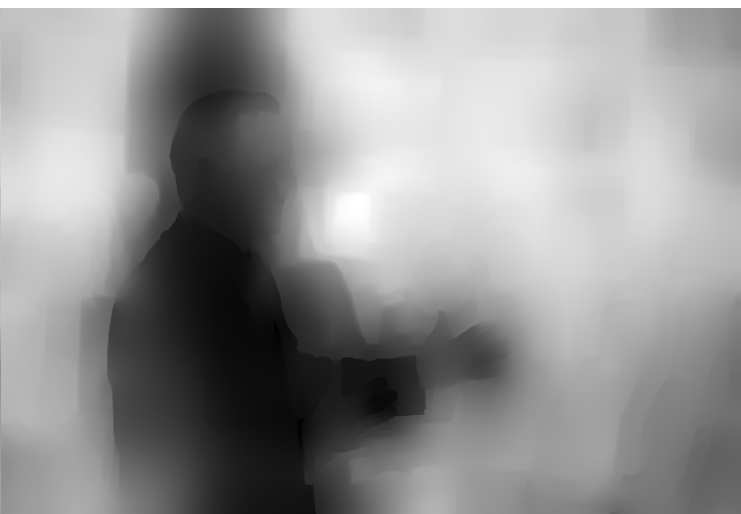

Karaali *et al.* [6]

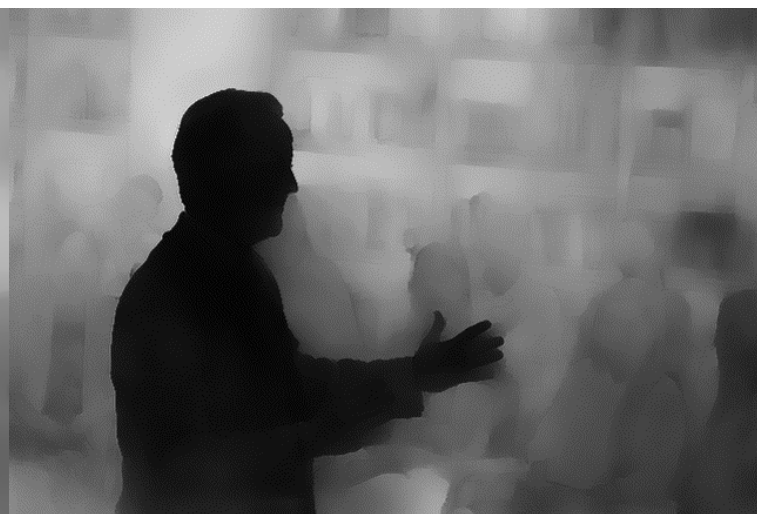

Ours

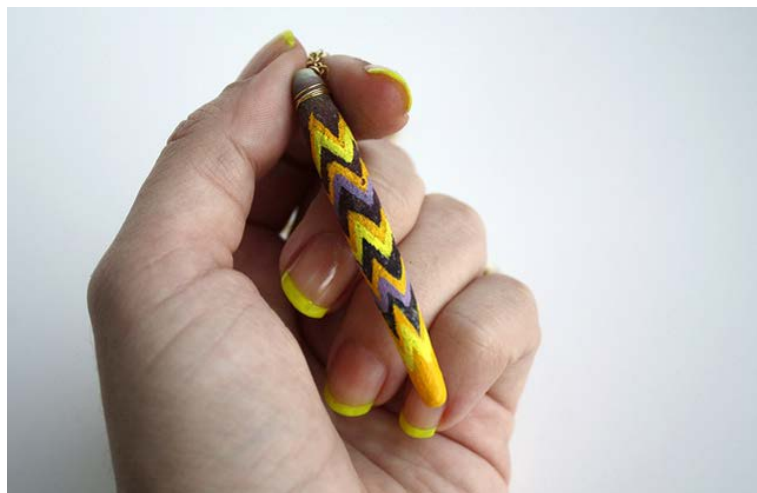

Input

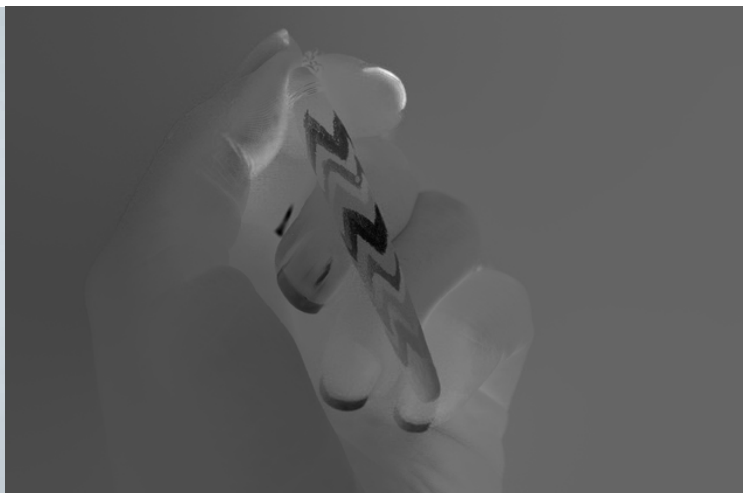

Zhou *et al.* [3]

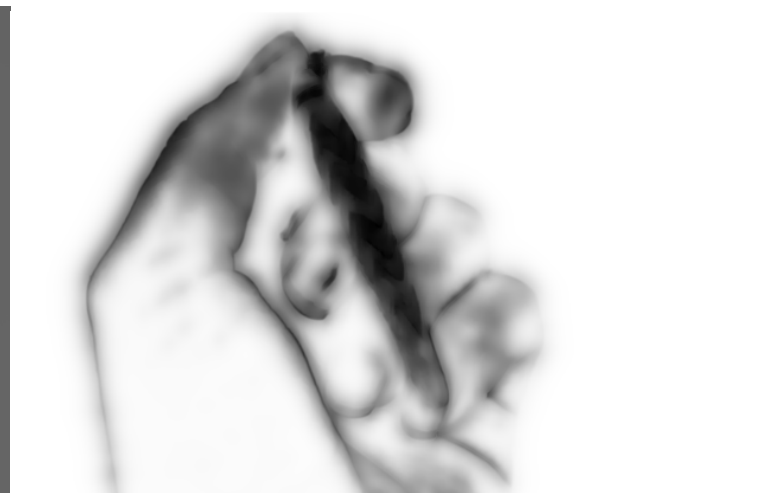

Shi *et al.* [4]

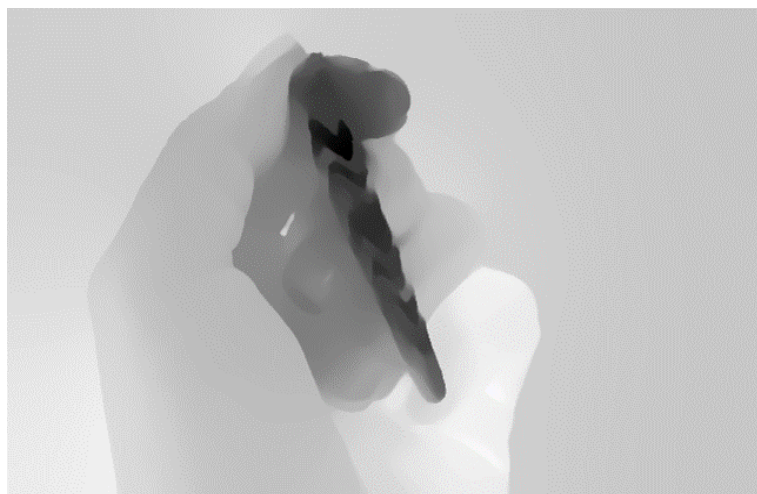

Park *et al.* [5]

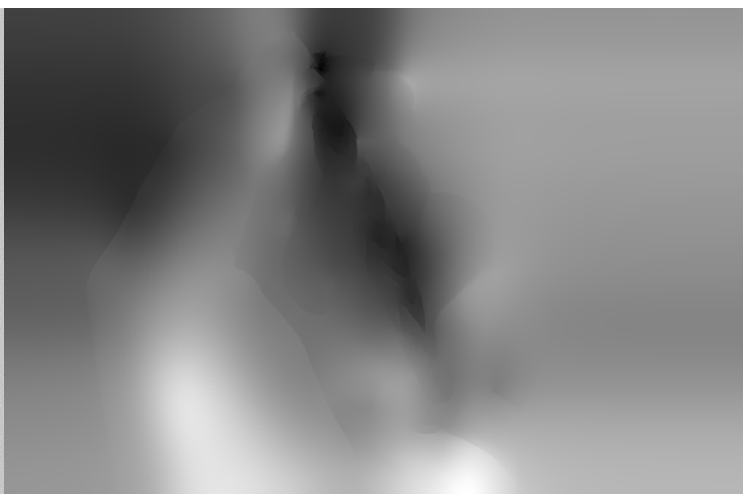

Karaali *et al.* [6]

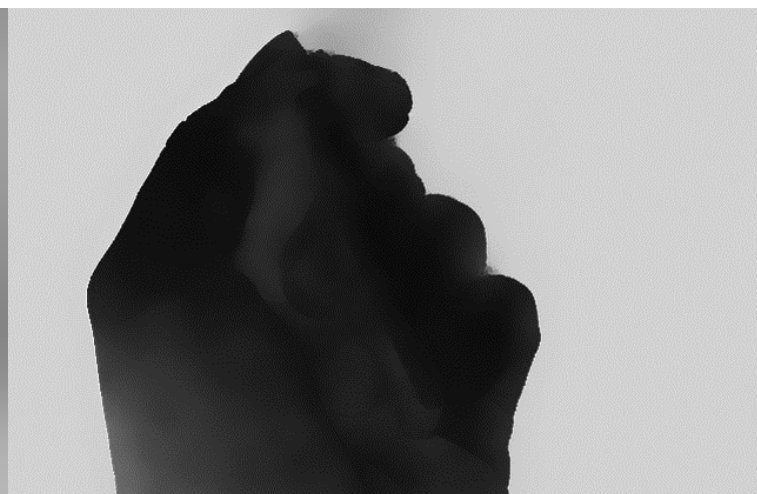

Ours

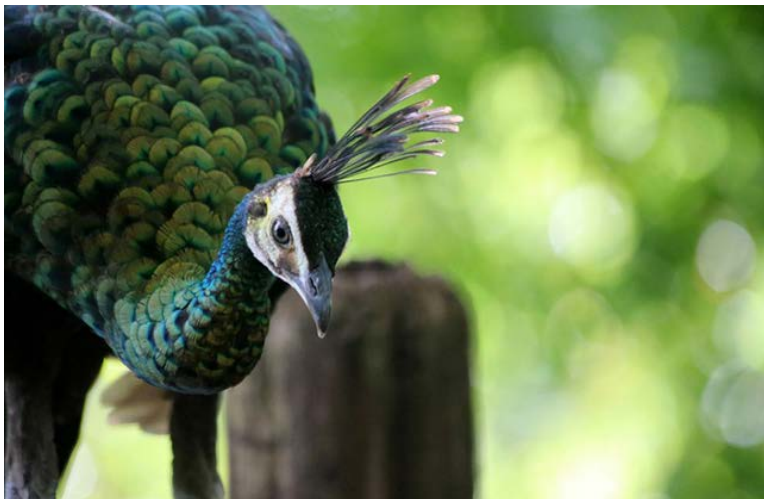

Input

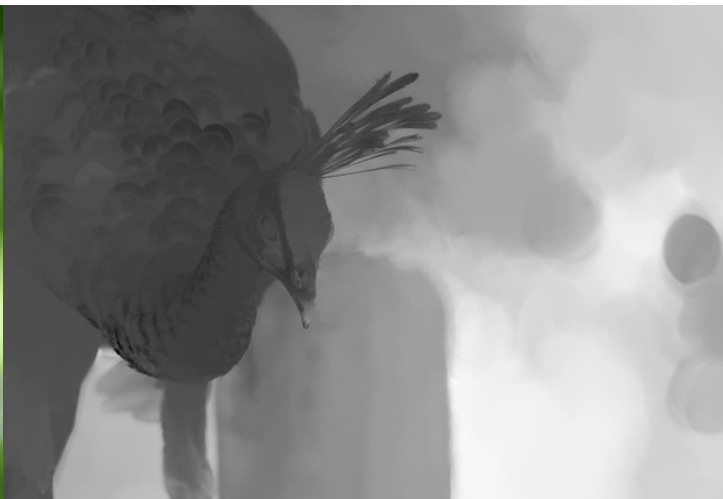

Zhou *et al.* [3]

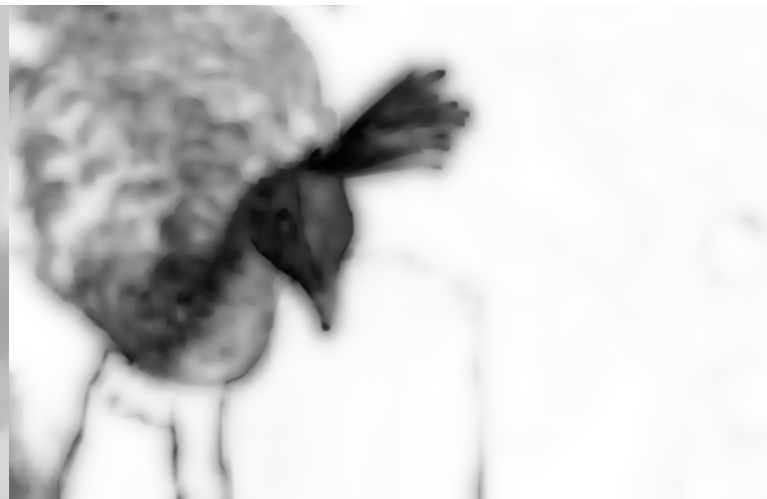

Shi *et al.* [4]

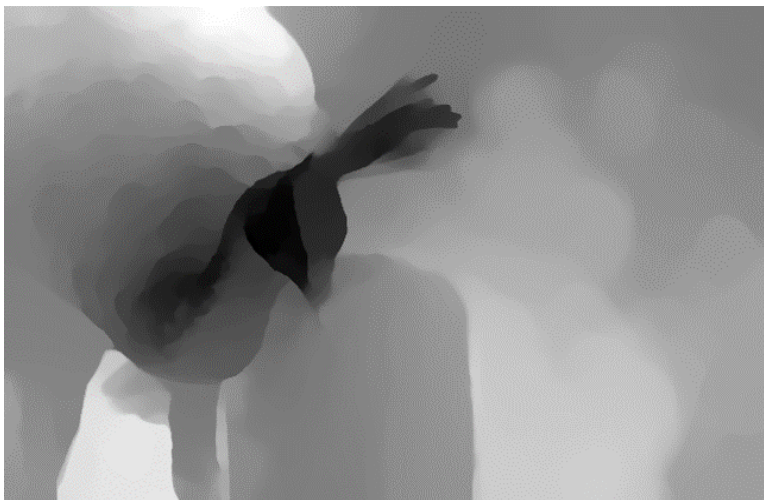

Park *et al.* [5]

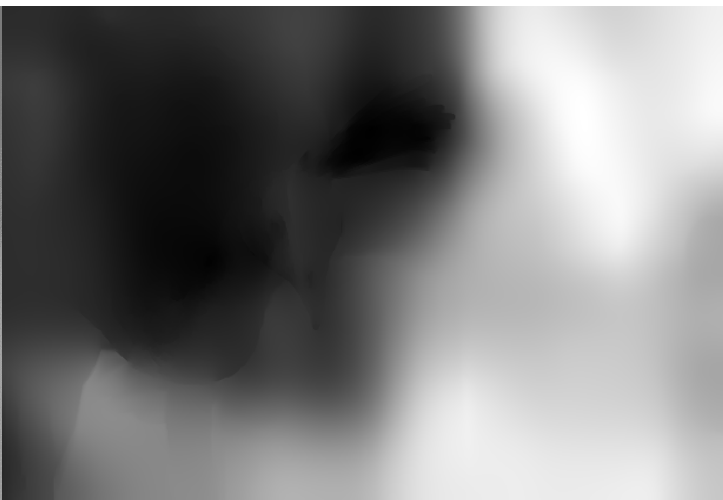

Karaali *et al.* [6]

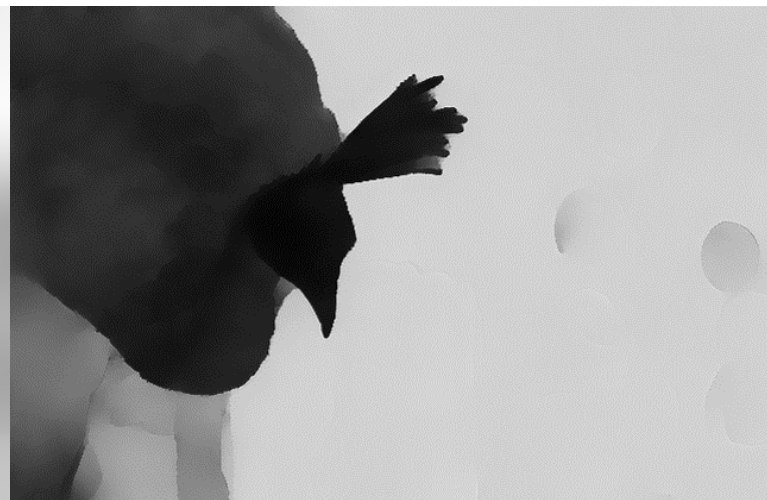

Ours

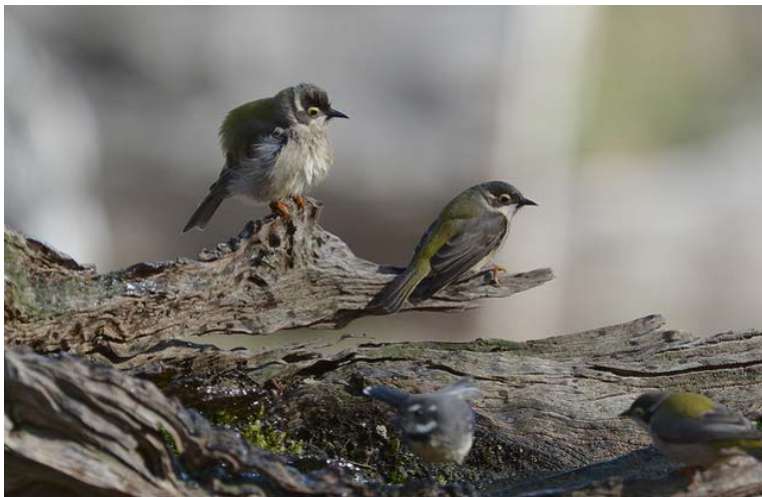

Input

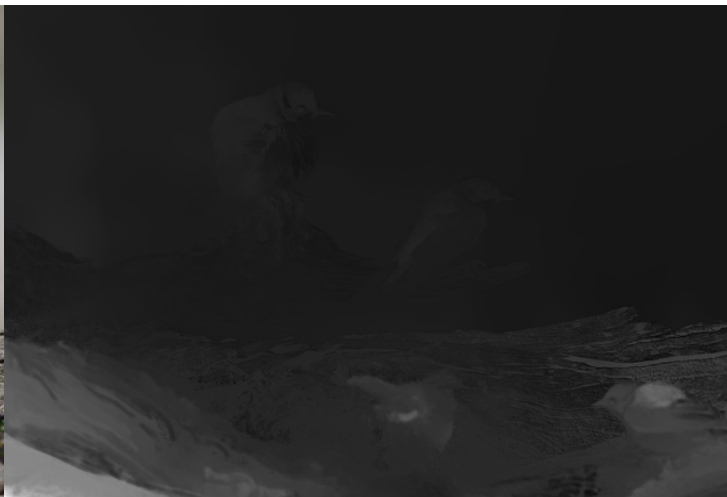

Zhou *et al.* [3]

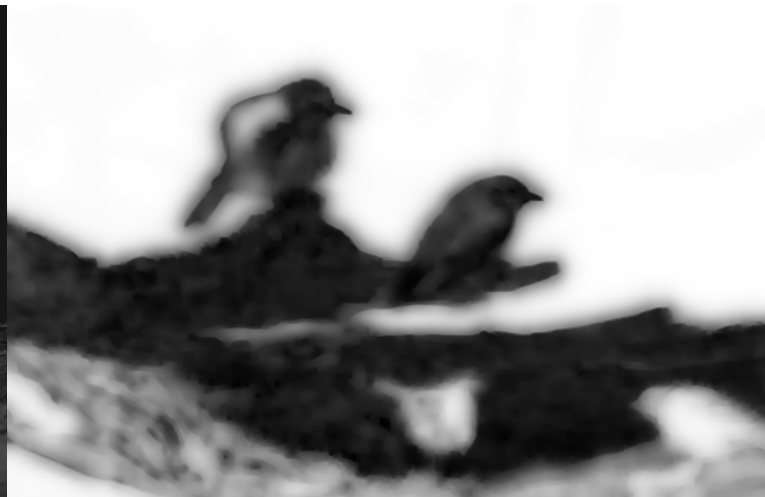

Shi *et al.* [4]

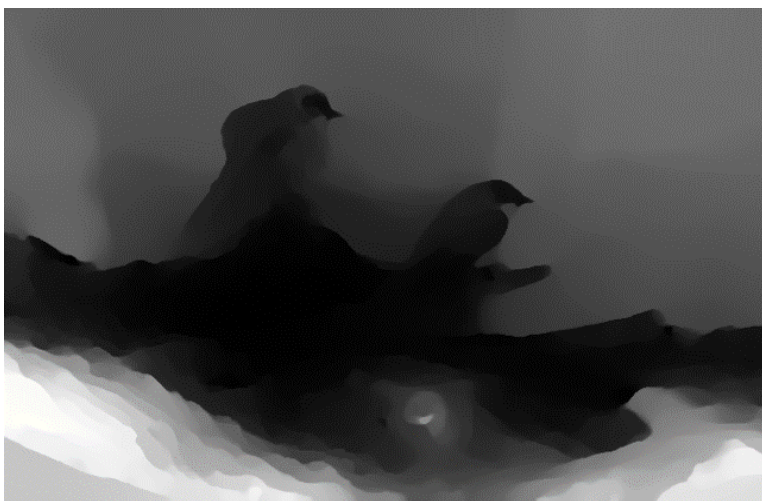

Park *et al.* [5]

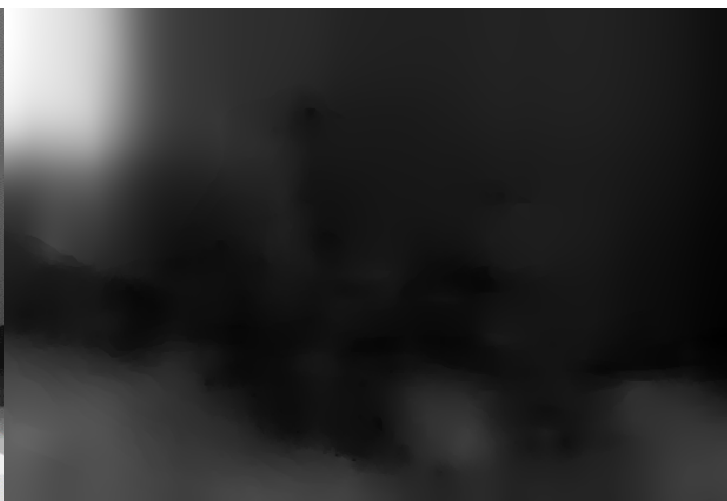

Karaali *et al.* [6]

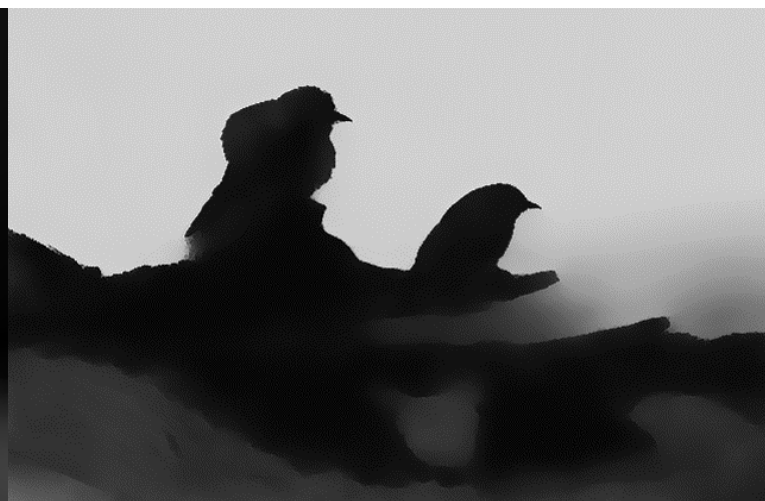

Ours

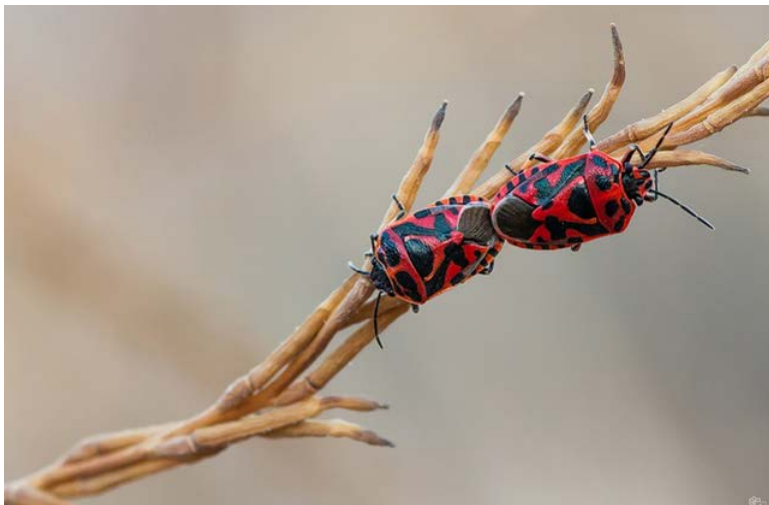

Input

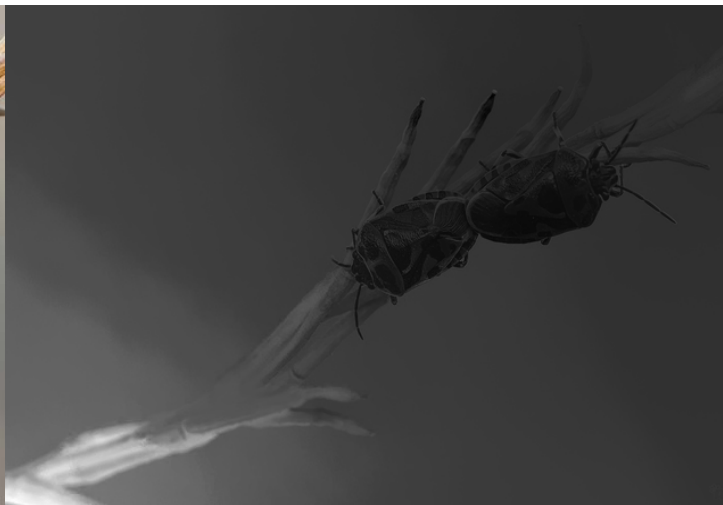

Zhou *et al.* [3]

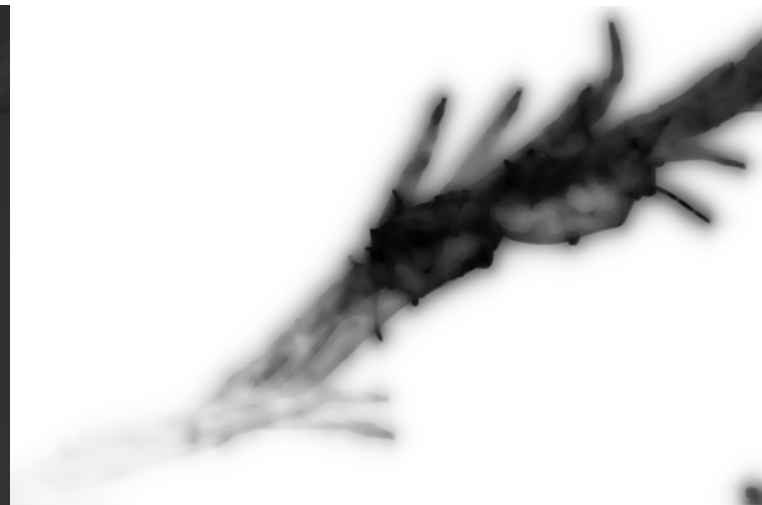

Shi *et al.* [4]

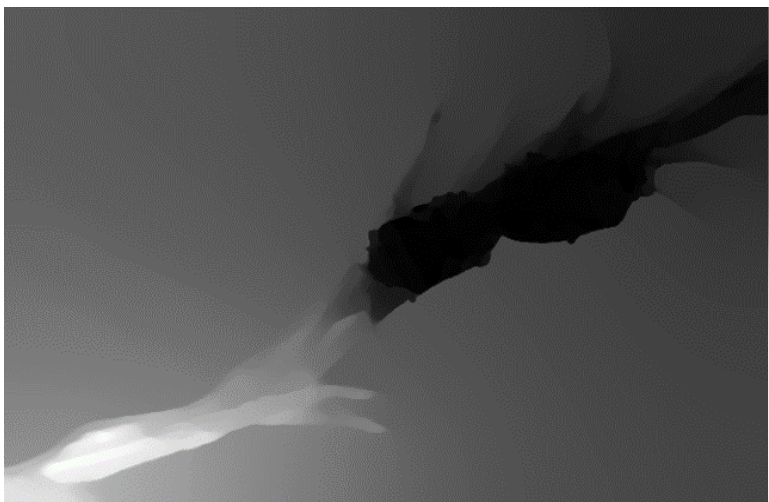

Park *et al.* [5]

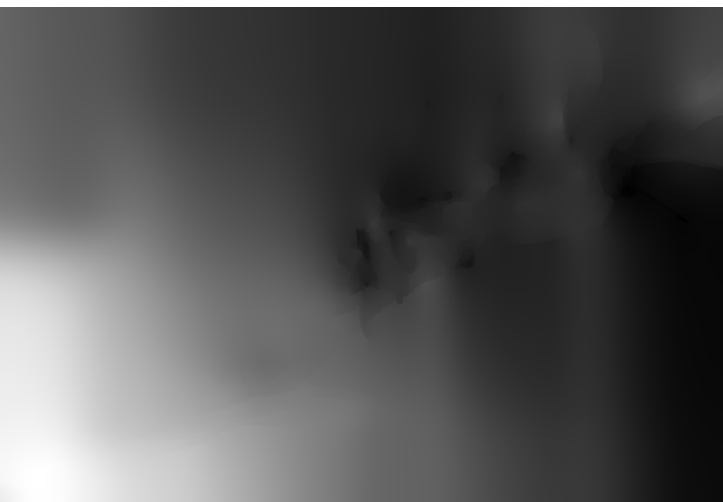

Karaali *et al.* [6]

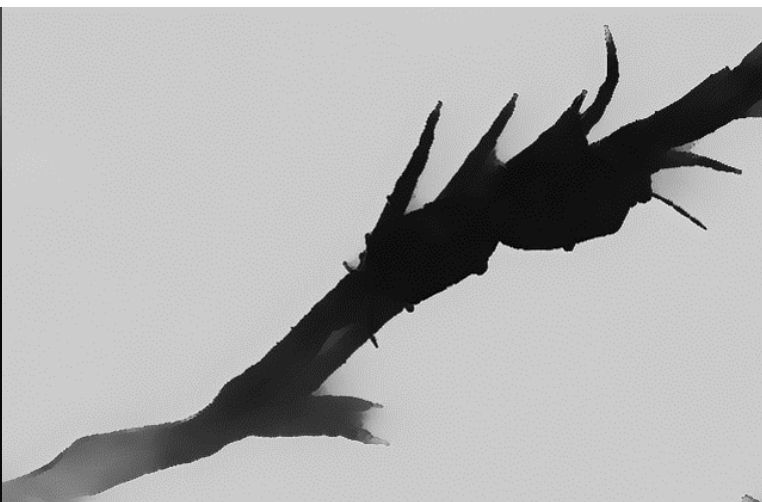

Ours

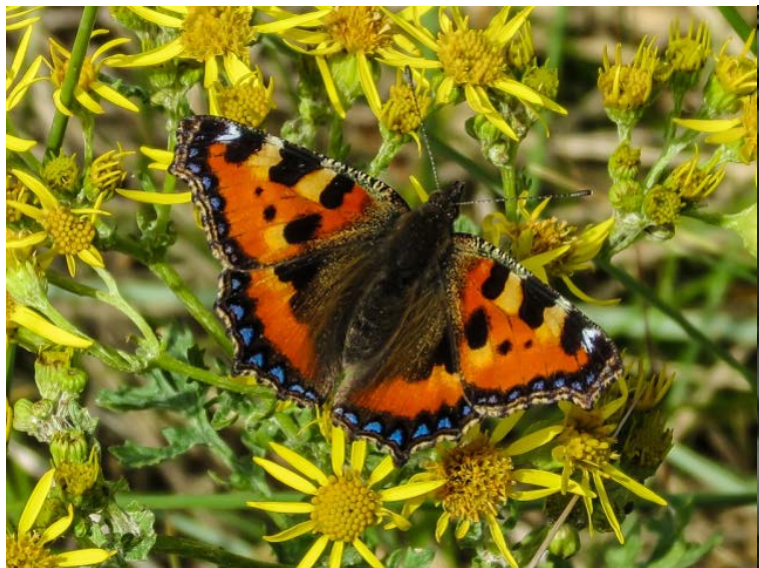

Input

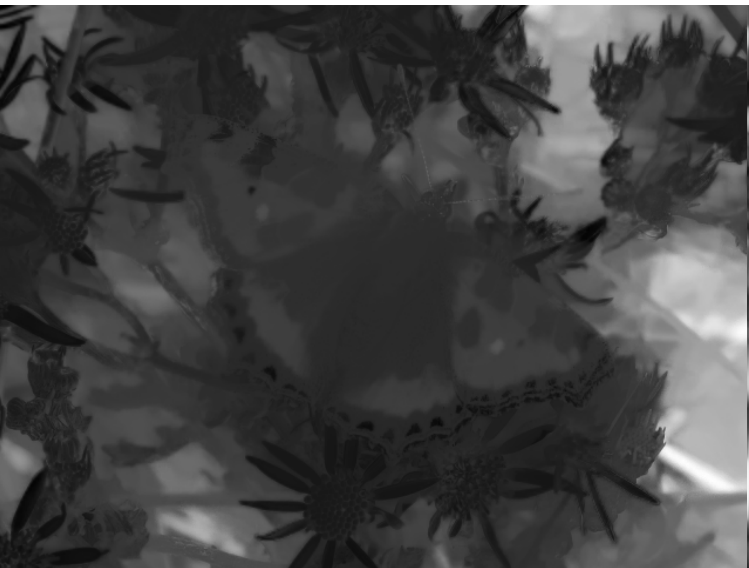

Zhou *et al.* [3]

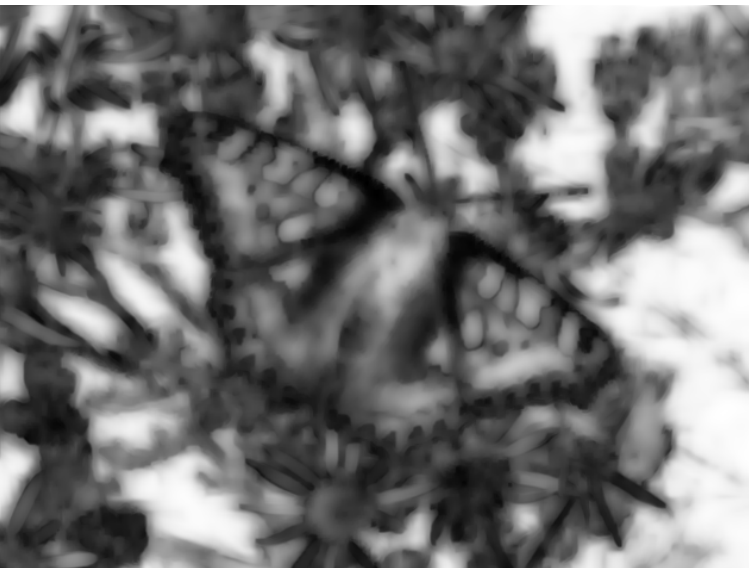

Shi *et al.* [4]

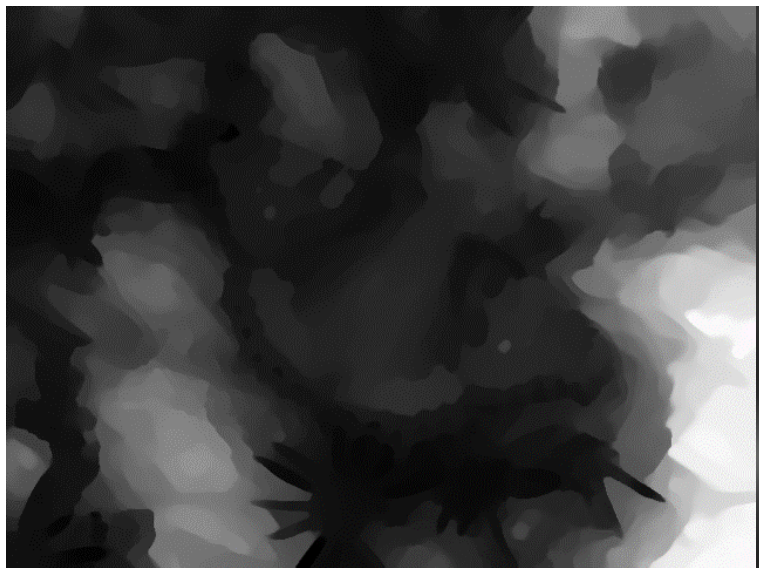

Park *et al.* [5]

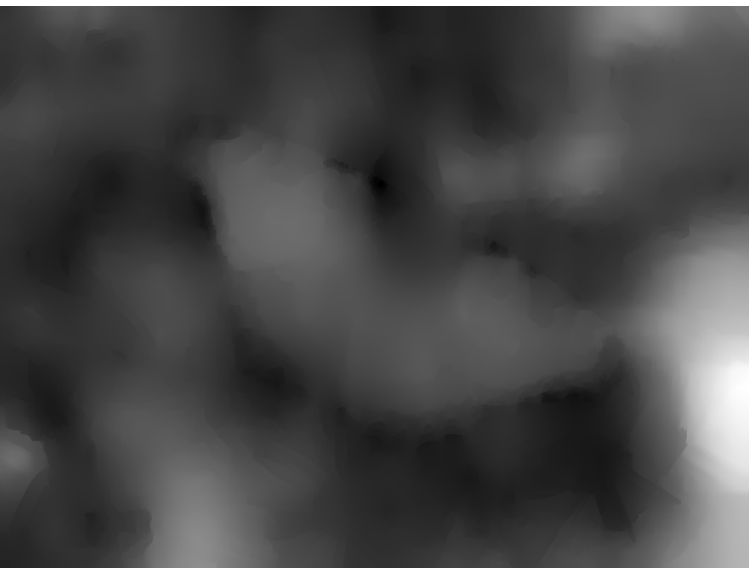

Karaali *et al.* [6]

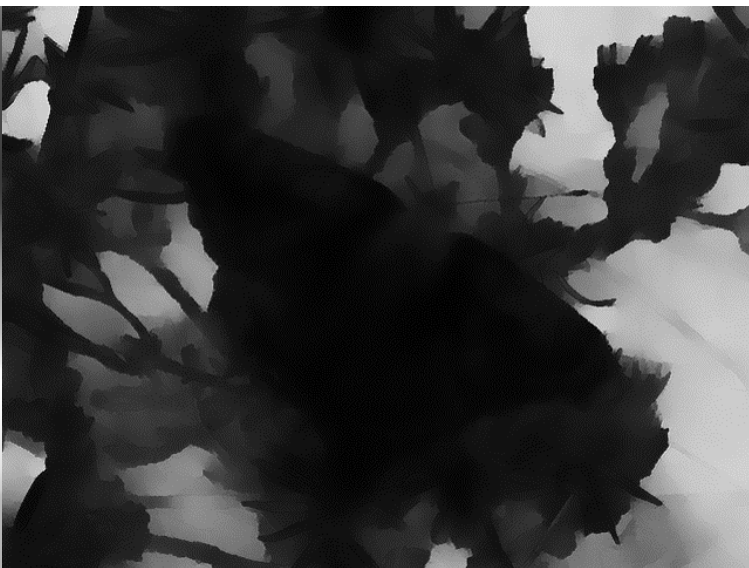

Ours

# Qualitative results on RTF dataset [2]

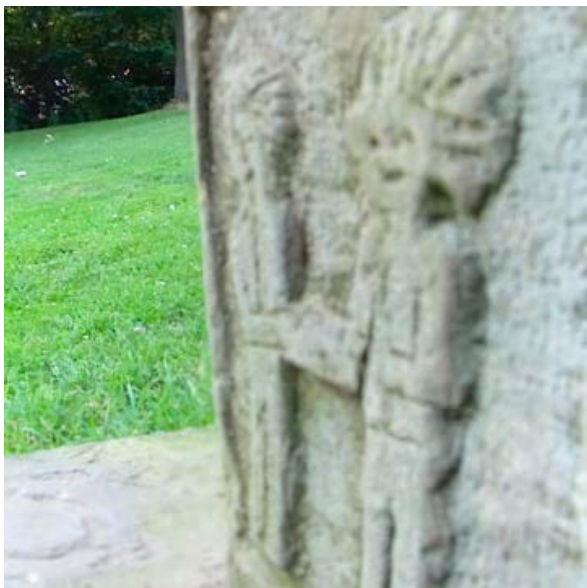

Input

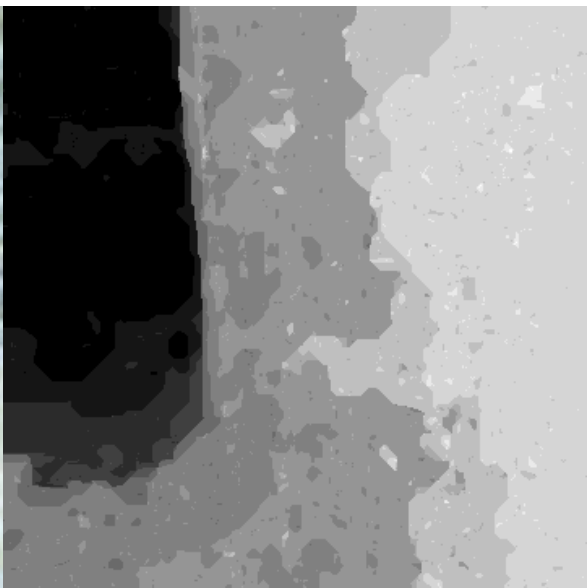

GT

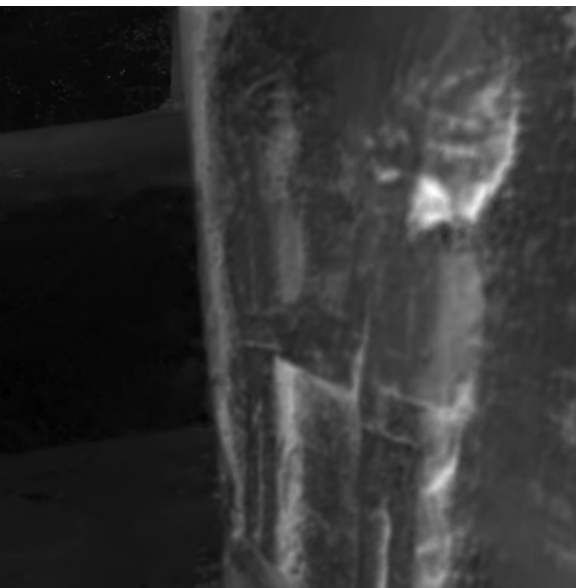

Zhou *et al.* [3]

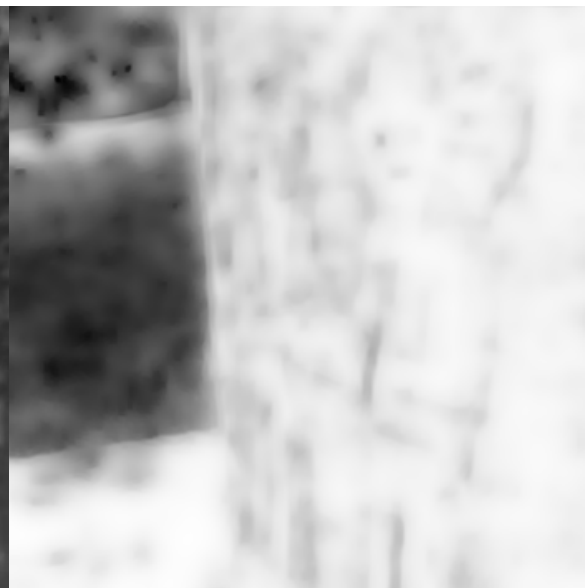

Shi *et al.* [4]

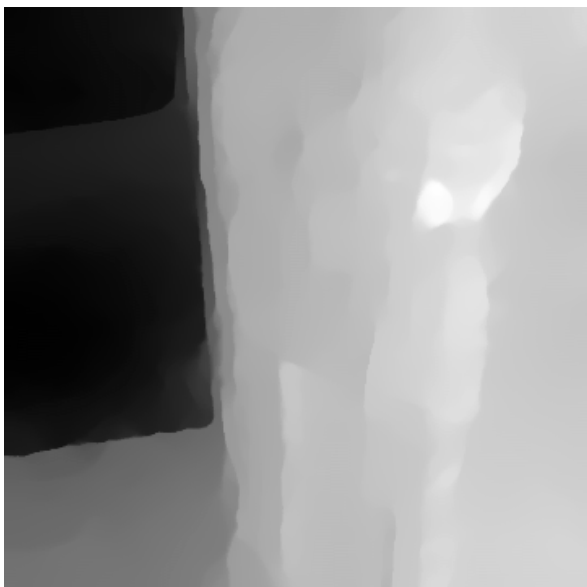

Park *et al.* [5]

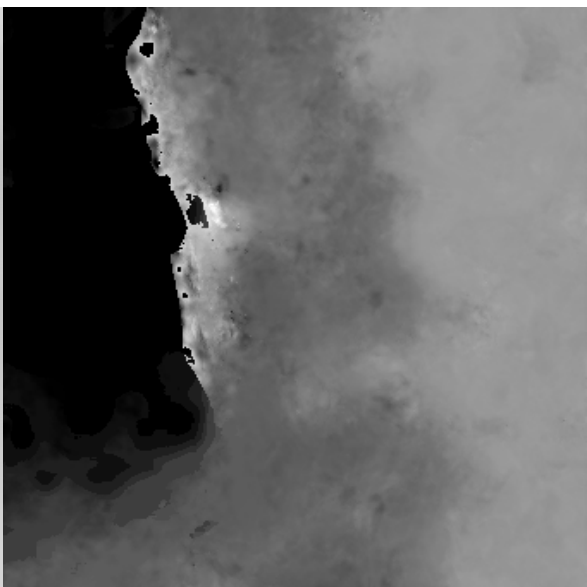

Andrès *et al.* [2]

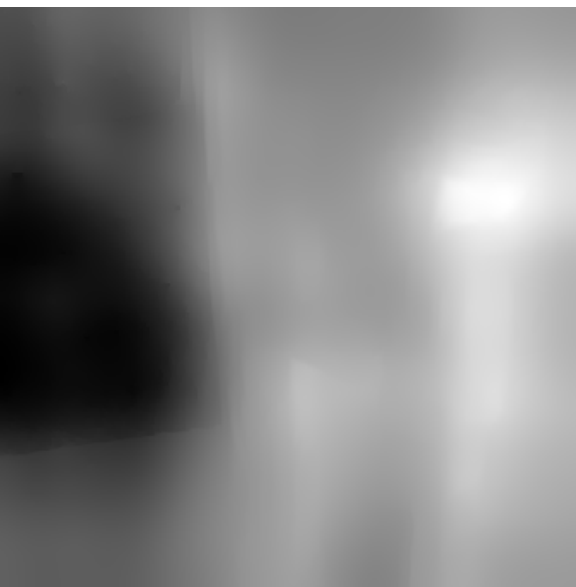

Karaali *et al.* [6]

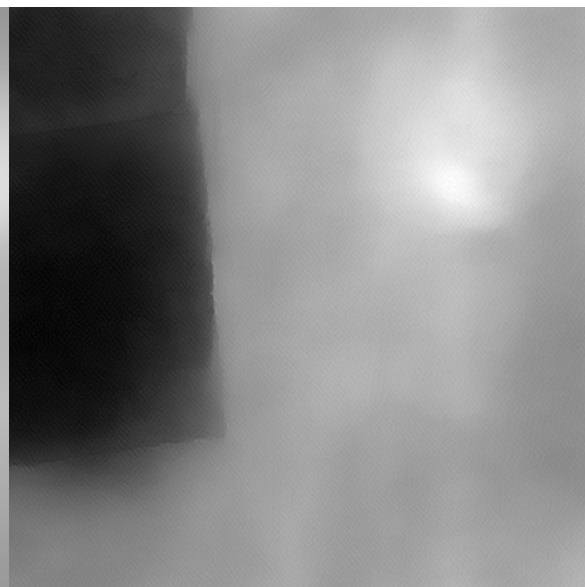

Ours

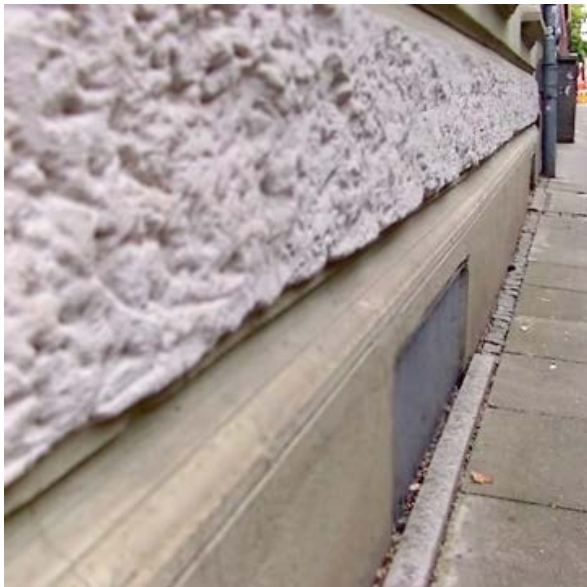

Input

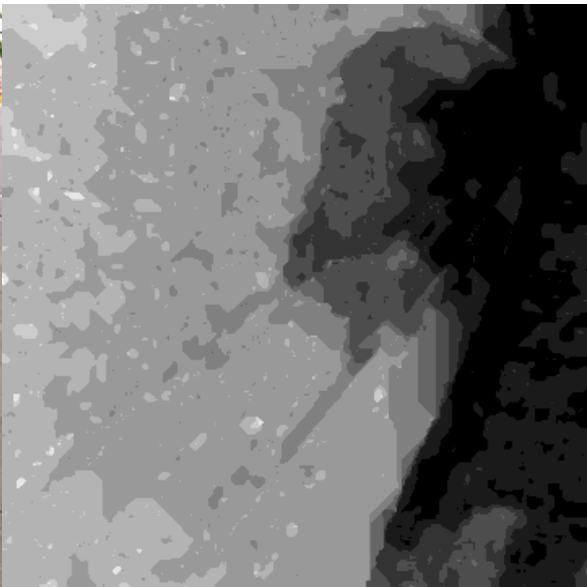

GT

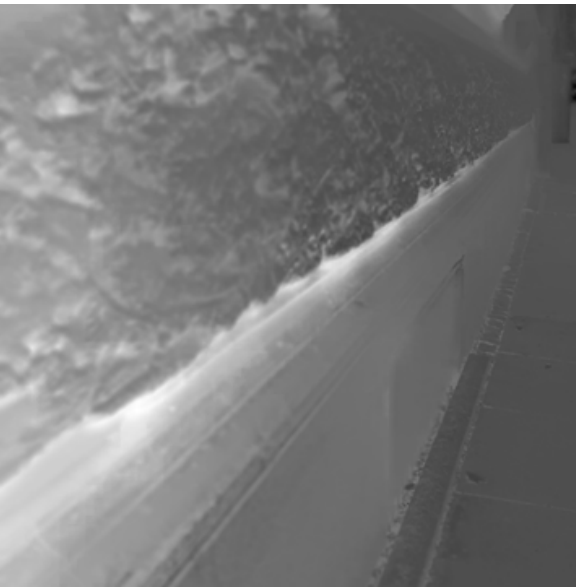

Zhou *et al.* [3]

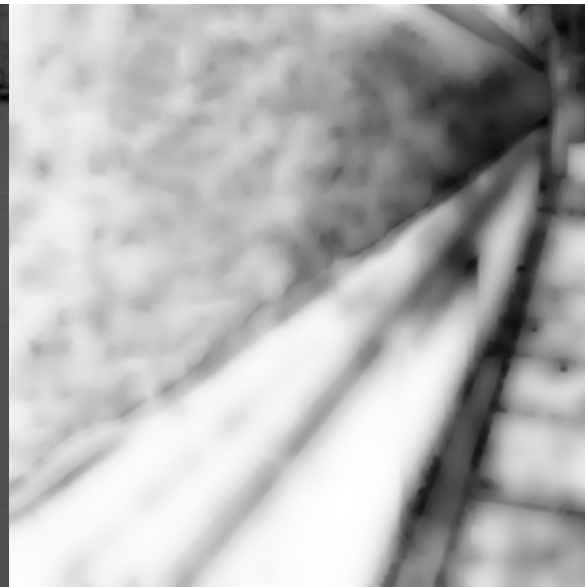

Shi *et al.* [4]

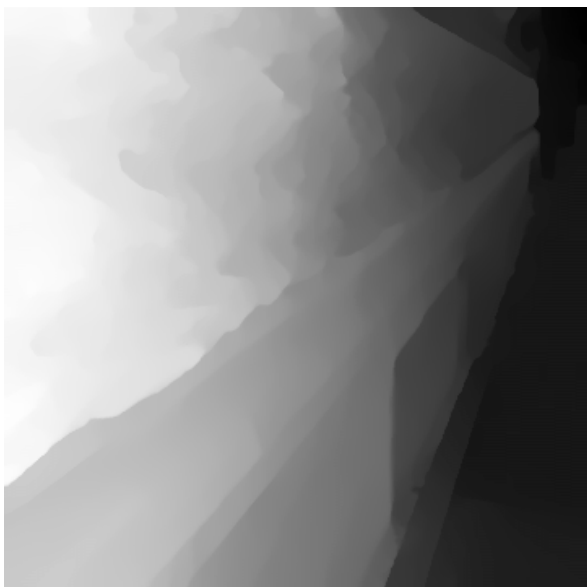

Park *et al.* [5]

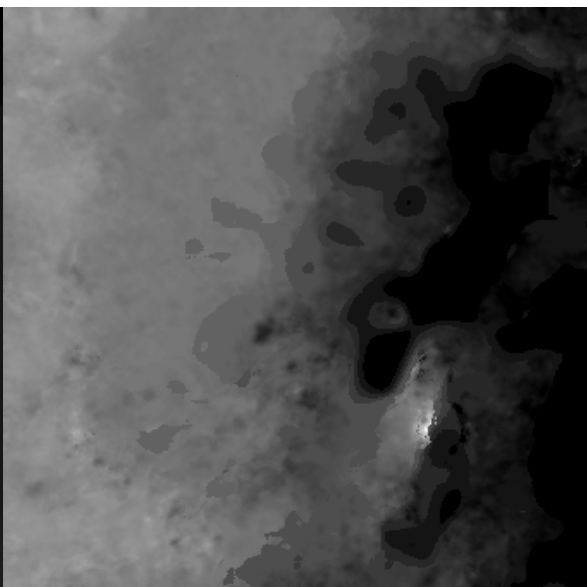

Andrès *et al.* [2]

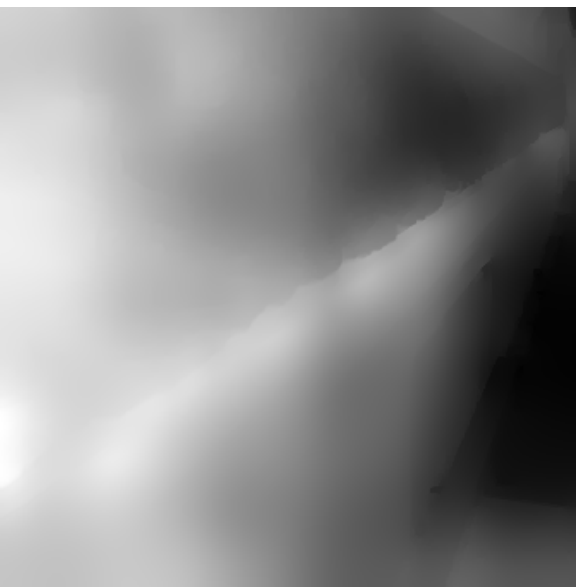

Karaali *et al.* [6]

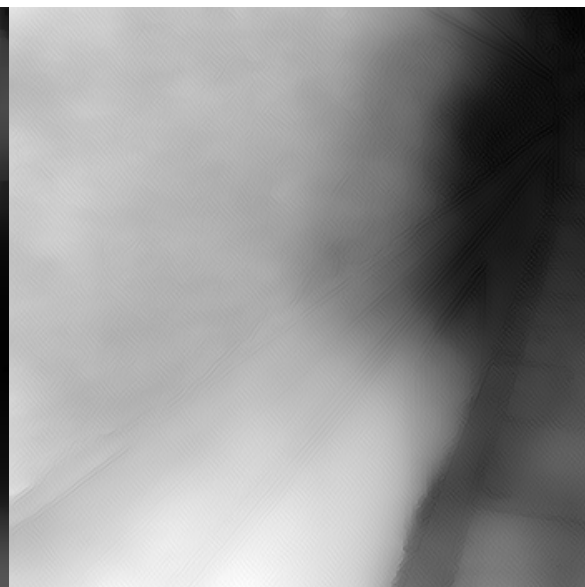

Ours

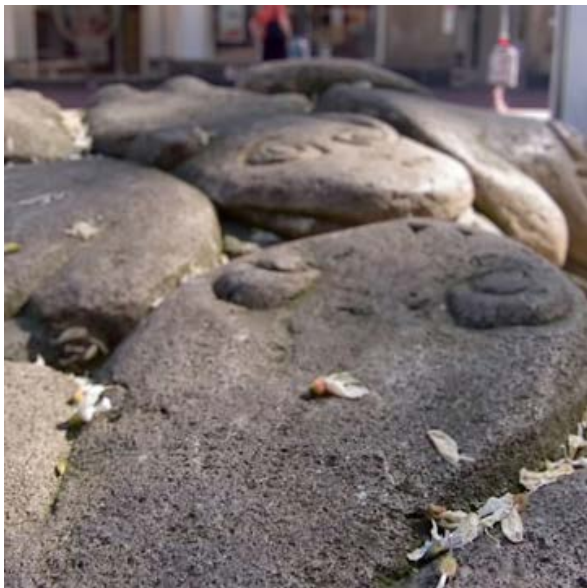

Input

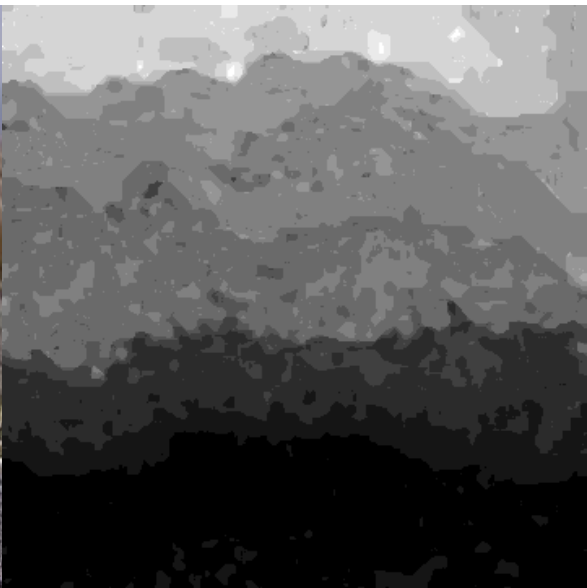

GT

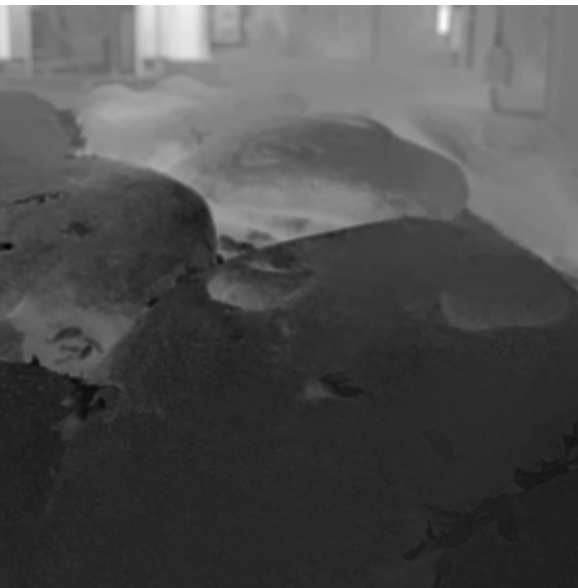

Zhou *et al.* [3]

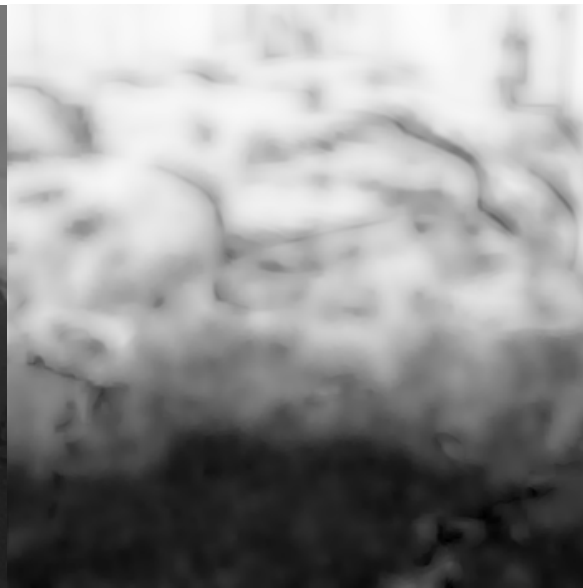

Shi *et al.* [4]

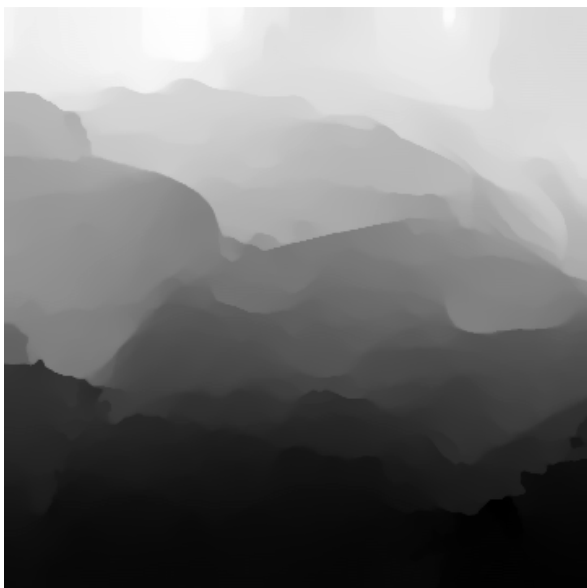

Park *et al.* [5]

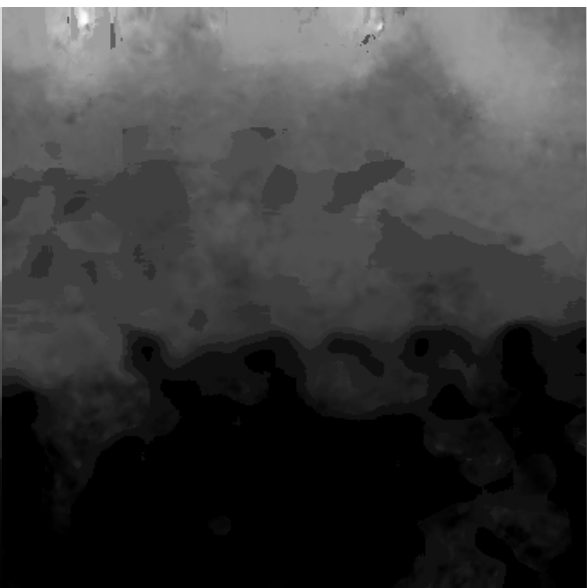

Andrès *et al.* [2]

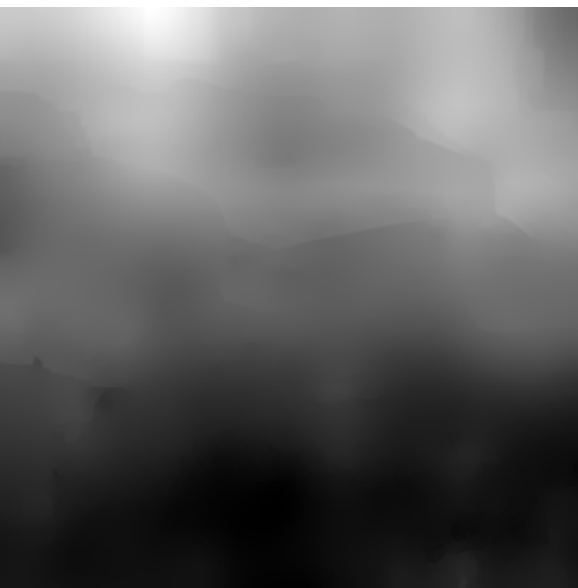

Karaali *et al.* [6]

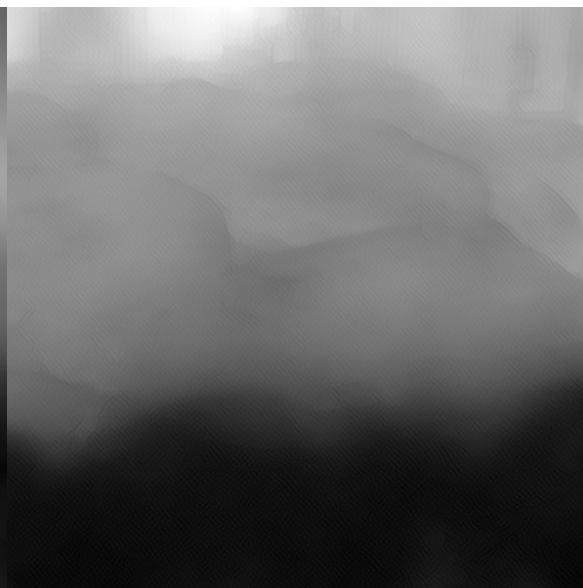

Ours

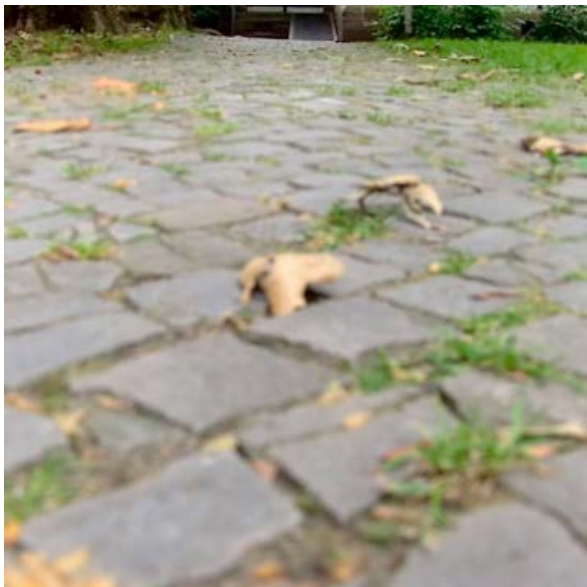

Input

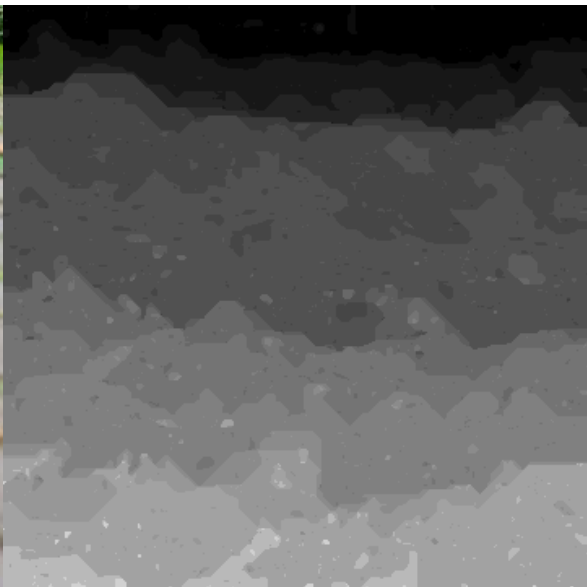

GT

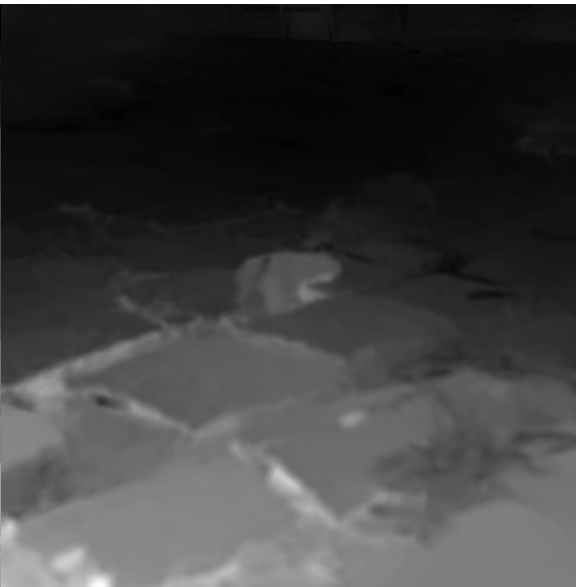

Zhou *et al.* [3]

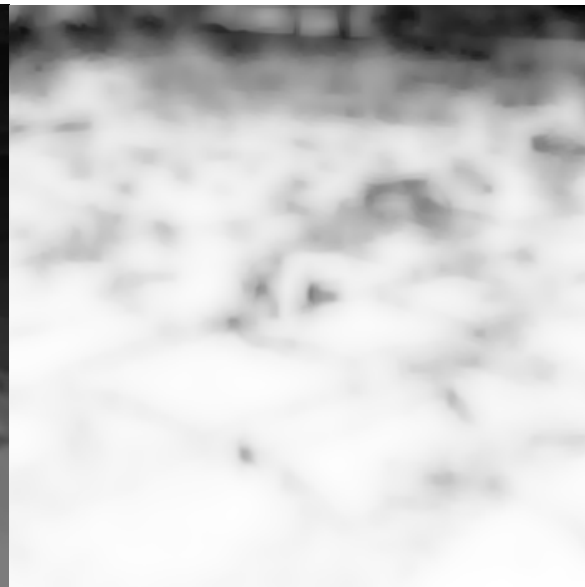

Shi *et al.* [4]

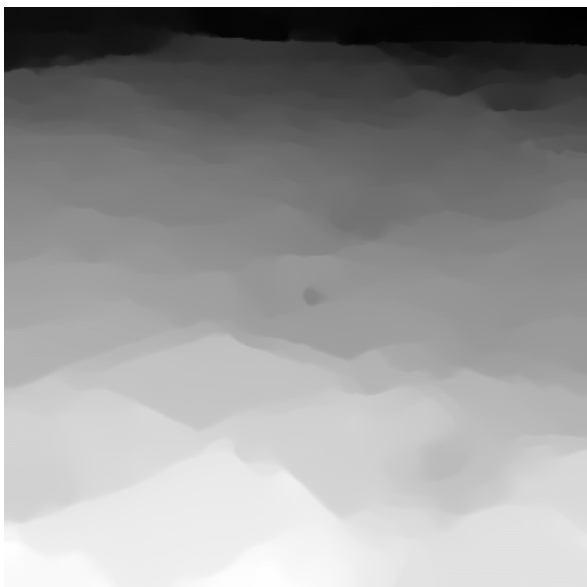

Park *et al.* [5]

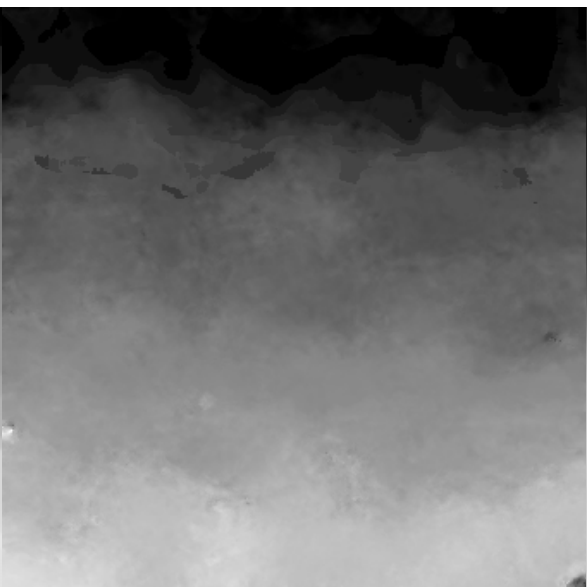

Andrès *et al.* [2]

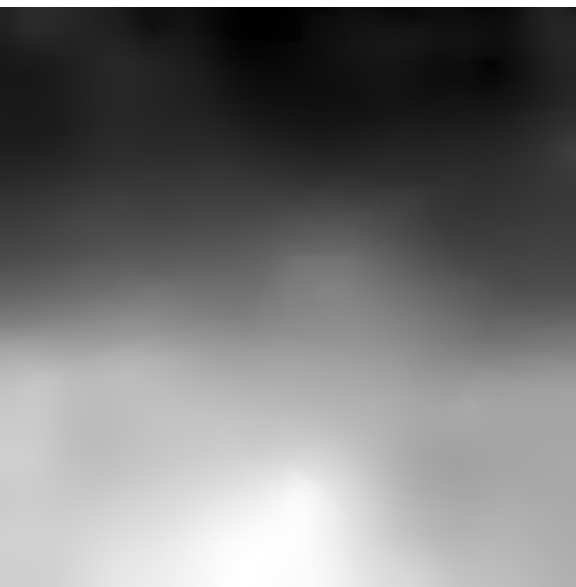

Karaali *et al.* [6]

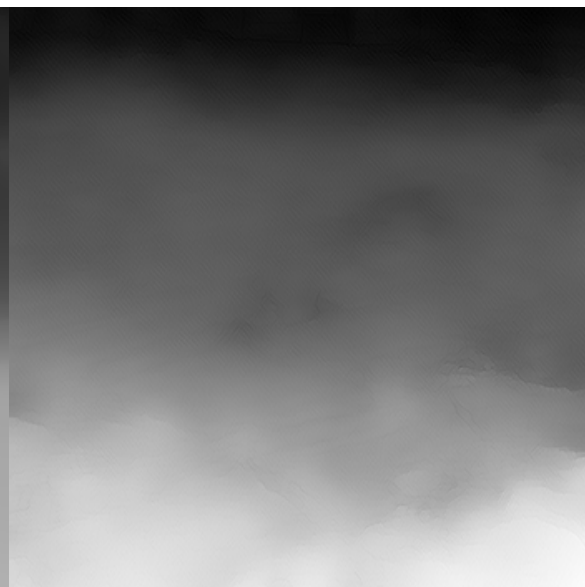

Ours

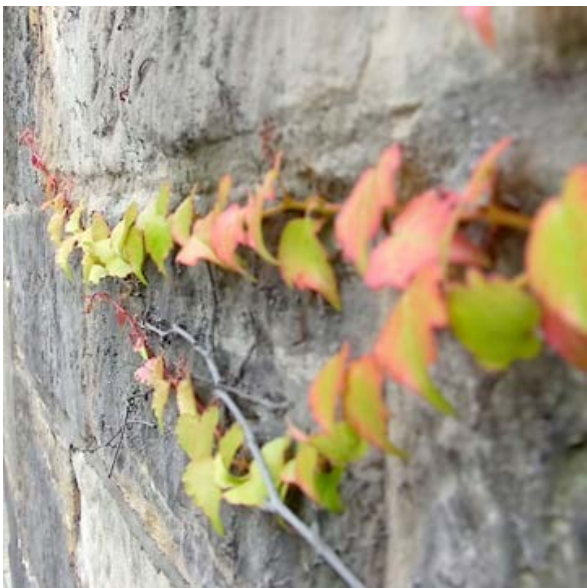

Input

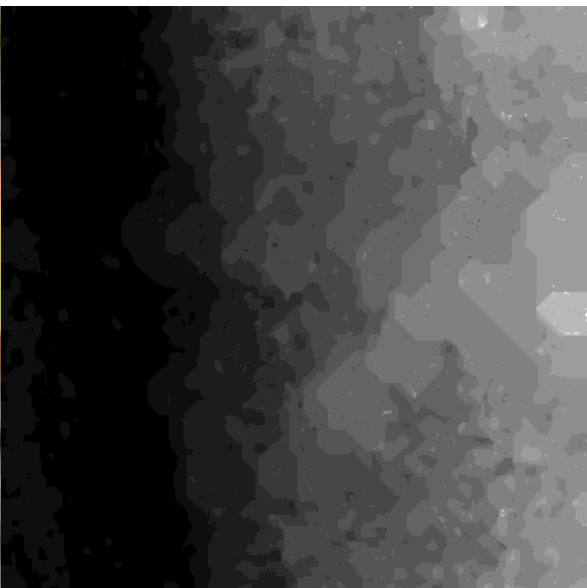

GT

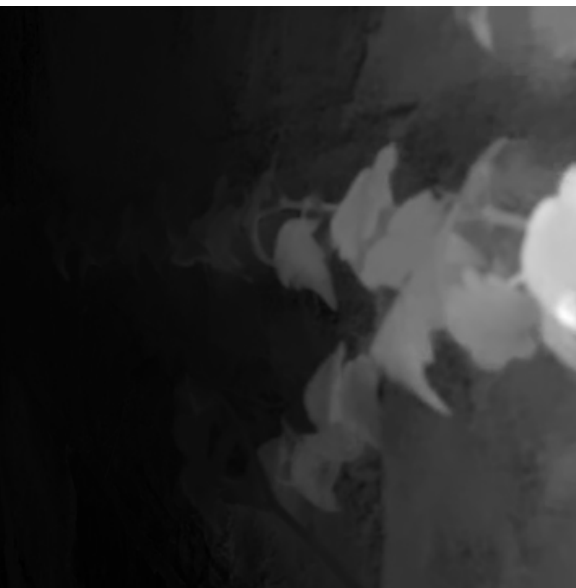

Zhou *et al.* [3]

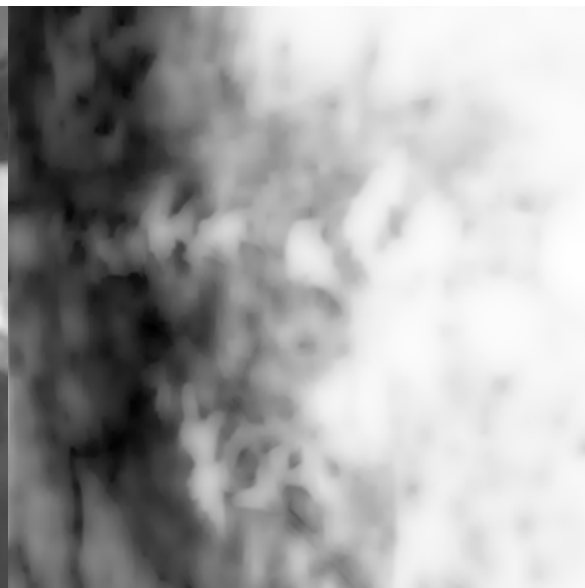

Shi *et al.* [4]

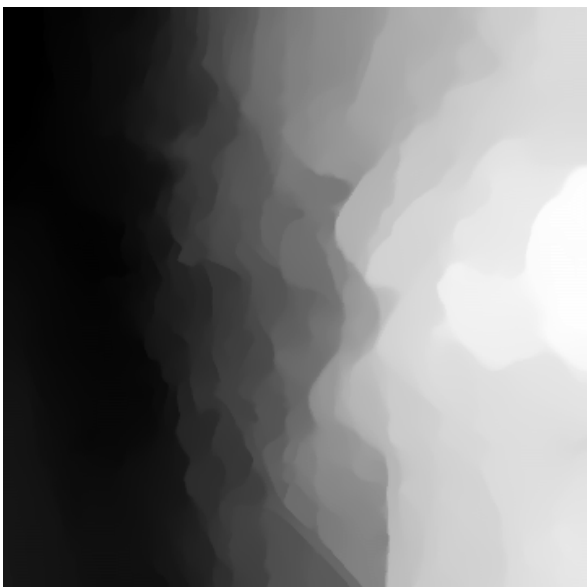

Park *et al.* [5]

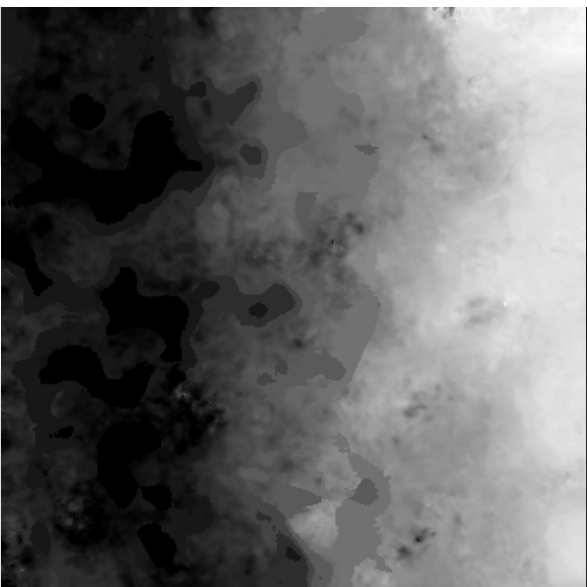

Andrès *et al.* [2]

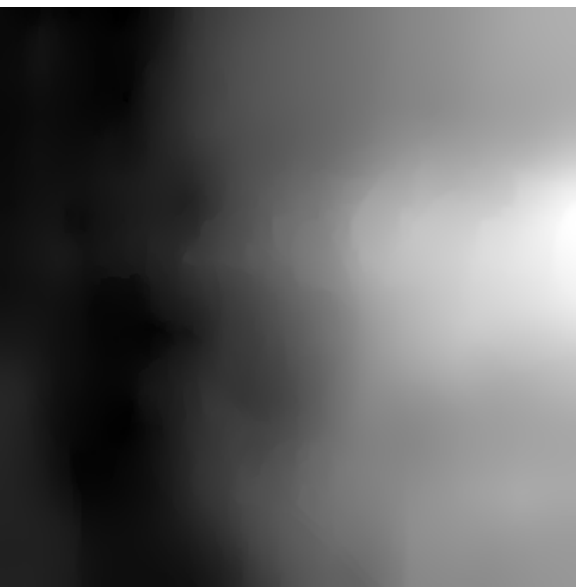

Karaali *et al.* [6]

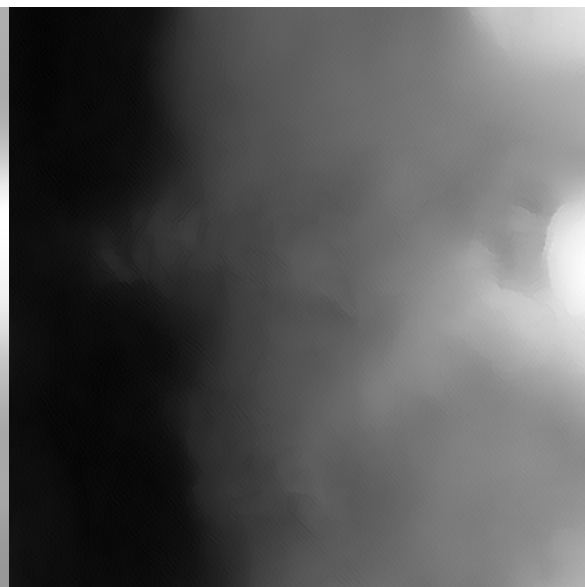

Ours

# References

- [1] J. Shi, L. Xu, and J. Jia. Discriminative blur detection features. In Proc. CVPR, 2014.
- [2] L. D’Andrès, J. Salvador, A. Kochale, and S. Susstrunk. Nonparametric blur map regression for depth of field extension. In IEEE Trans. Image Processing (TIP), 25(4):1660–1673, 2016.
- [3] S. Zhuo and T. Sim. Defocus map estimation from a single image. Pattern Recognition, 44(9):1852–1858, 2011.
- [4] J. Shi, L. Xu, and J. Jia. Just noticeable defocus blur detection and estimation. In Proc. CVPR, 2015.
- [5] J. Park, Y. Tai, D. Cho, and I. S. Kweon. A unified approach of multi-scale deep and hand-crafted features for defocus estimation. In Proc. CVPRI, 2017.
- [6] A. Karaali and C. Jung. Edge-based defocus blur estimation with adaptive scale selection. In IEEE Trans. Image Processing (TIP), 27(3):1126–1137, 2018.
- [7] S. Zhang, X. Shen, Z. Lin, R. Měch, J. P. Costeira, and J. M. F. Moura. Learning to understand image blur. In Proc. CVPR, 2018.
